# Supplementary material for: Transformation-aggravated oxide embrittlement mechanism and carbon microalloying ductilisation strategy in refractory complex concentrated alloys
Source: Research Square preprint supplement (doi:10.21203/rs.3.rs-7842583/v1), 2025-12-12
Supplement: Supplementary file 1 [file 61d8465de0fdcd2f299e4af2.docx]

**Supplementary Materials**

**Transformation-aggravated oxide embrittlement mechanism and carbon microalloying ductilisation strategy in refractory complex concentrated alloys**

Gaoyuan Shen, Shubin Wang*, Junfeng Wang, Yi He, Chao Yang, Da Shu*, Baode Sun

Shanghai Key Laboratory of Advanced High-temperature Materials and Precision Forming and State Key Laboratory of Metal Matrix Composites, School of Materials Science and Engineering, Shanghai Jiao Tong University, Shanghai, 200240, China

Supplementary Note 1 Page 3

Supplementary Note 2 Page 11

Supplementary Note 3 Page 13

Supplementary Note 4 Page 18

Supplementary Note 5 Page 22

Supplementary Note 6 Page 28

Supplementary Note 7 Page 30

Supplementary Note 8 Page 32

Supplementary Note 9 Page 35

Supplementary Note 10 Page 37

Supplementary Note 11 Page 42

Supplementary Fig. 1 Page 44

Supplementary Fig. 2 Page 45

Supplementary Fig. 3 Page 46

Supplementary Fig. 4 Page 47

Supplementary Fig. 5 Page 48

Supplementary Fig. 6 Page 49

Supplementary Fig. 7 Page 50

Supplementary Fig. 8 Page 51

Supplementary Fig. 9 Page 52

Supplementary Fig. 10 Page 53

Supplementary Fig. 11 Page 54

Supplementary Fig. 12 Page 55

Supplementary Fig. 13 Page 56

Supplementary Fig. 14 Page 57

Supplementary Fig. 15 Page 58

Supplementary Table 1~7 Page 59

**Supplementary Note 1 | Oxygen embrittlement in RCCAs**

This note is a short review on various oxygen embrittlement mechanisms in refractory (complex concentrated) alloys, several ductillization strategies and their corresponding limitations. From this note, the novelty yet ubiquity of the oxygen embrittlement mechanisms in this study, the high efficacy and low costs of the carbon microalloying ductilisation strategy, as well as the indispensability of the composition design of the base Nb-Ta-Hf-W RCCA can all be manifested.

In refractory metals, refractory alloys and RCCAs, oxygen impurities come from various origins including the feedstock1, preparation environment1, processing environment2, service environment3, etc. If classifying these materials into two categories as those with or without intrinsic plasticity at room temperature (RT), a rough correlation with the two types of oxygen embrittlement can be found.

In the latter (intrinsically brittle) category, polycrystalline Mo/W and their alloys, as well as RCCAs with high (Mo+W) content, seldom suffer from brittleness caused by oxides, but often by oxygen in atomic form. This is because VIB-group elements Mo and W have relatively lower combining tendency with oxygen compared to other refractory elements4,5, rendering oxygen impurities free atomic form instead of compounds4,6. Meanwhile, VIB-group elements also have far lower (negligible) solubility of oxygen in the intragranular crystal lattice compared to other refractory elements4,6, which leads to severer oxygen segregation towards grain boundaries (GBs) with a local oxygen concentration as high as 5~10 at.% even if the bulk oxygen content is not high7. In the NbTaMoW RCCA with 50% VB-group elements which can dissolve higher amount of oxygen in their pure metal forms4,6, however, the severe distortion and contraction in the overall alloy lattice also result in extremely low oxygen solubility at octahedral/tetrahedral interstitial sites and thus oxygen segregation towards GBs8,9. Due to the high electron negativity and bond directionality of O atoms, the electron charge density along the O-M (M stands for metals) bonds at GBs are depleted around the M sites but are localized around the O sites9-11, causing increased ionicity and weakened strength/flexibility of the bond and thus degraded cohesion of GBs9,11. This ultimately leads to easy intergranular brittle fracture under external loading even at low stresses, as seen in Mo12, TZM13, W14, W-Ta alloys15, equiatomic NbTaMoW RCCA16 and non-equiatomic RCCAs in the Nb-Ta-Mo-W family17,18, typically in their as-cast, as-sintered, homogenized and/or recrystallized states where a large proportion of high angle grain boundaries (HAGBs) possess high GB energy for preferential oxygen segregation19.

On the other hand, pure Mo/W and RCCAs with high VIB element contents have more compact screw dislocation core structures20-22, weaker bimodality in electronic density of states21 and less edge components in the screw dislocation core23 compared to pure V/Nb/Ta or RCCAs with higher VB+IVB element contents, rendering them far higher energy barriers for the activation of screw dislocations or kink pairs at low homologous temperatures and thus a ductile-to-brittle transition temperature (DBTT) below RT. This is why intrinsic brittleness usually overlapps with GB extrinsic embrittlement induced by oxygen in atomic form within these materials, as manifested by their fractography exhibiting mixed intergranular + transgranular cleavage as seen in TZM24,25, Mo-Re alloys26, NbTaMoW9,27, etc. Sometimes, only intergranular fracture can be observed, which is caused by the far lower GB strength compared to the transgranular cleavage threshold stress.

It is worth noting that this correlation is not absolute, especially when concerning the external conditions. Firstly, the supersaturated oxygen in VIB-group metals in some cases should be regarded as tiny oxides4,8, which might actually be embryos and are unnecessary to be distinguished from atomic form oxygen in terms of their embrittlement mechanisms. But secondly, indeed, for some near-equilibrium Mo/W/NbTaMoW samples (e.g., melted at slow solidification rates28, heat treated at high temperatures or for long time29, hot isostatic pressed (HIP)27, and/or thermomechanically processed30), mature oxides would form at GBs with the more active Nb/Ta solutes combining with O27,30, or with Mo/W finally combining with O under sufficient thermodynamic conditions28,29.

For this category of oxygen embrittlement, several mitigating strategies had been put forward. Adding trace amounts of boron and/or carbon atoms can first suppress GB oxygen segregation by their higher diffusion rate and lower GB segregation energy9,31, as an embodiment of the “site competition” effect32,33. Then, boron and/or carbon can even further strengthen the GB atomic cohesion through their robust electronic interactions with metallic elements that enhances the charge density and integrity of the metallic bonds9,11,34. Indeed, the intergranular fracture can be completely or partially eliminated after boron/carbon microalloying, and the fracture toughness and/or compressive ductility can be relatively improved, as seen in Mo35,36, W37, NbTaMoW RCCA9 and VNbCrMoAl0.1 RCCA38. Alternatively, adding small amounts of reactive IVB-group elements can scavenge the harmful free atomic oxygen into small, discontinuous oxides in these materials, as seen in Mo-Hf12, W-Hf39, NbTaMoW-Ti40, etc. These oxides are benign and do not again lead to brittleness. Furthermore, promoting the segregation of specific substitutive solute elements that are most beneficial for GB cohesion under controlled thermodynamic conditions can also alleviate intergranular impurity-induced brittleness, such as W in VTaMoW RCCA41. However, after the implementation of these strategies, the RT tensile/compressive fracture mode of these materials only shifts from intergranular to transgranular cleavage, with still limited elongation even in compression9,12,35-38,40,41, revealing their intrinsic brittleness. One strategy to simultaneously mitigate intrinsic and extrinsic brittleness for these materials is thermomechanical processing, creating a deformed microstructure with large proportions of low angle grain boundaries (LAGBs) which are unfavorable for oxygen segregation and with pre-fabricated dislocations to facilitate the activation and migration of dislocations42,43. Nevertheless, this cannot be utilized for high-temperature applications, because the deformed structures would easily go through recrystallization under high temperatures and the recrystallization-induced oxygen embrittlement at HAGBs would reoccur19,44. Although methods such as doping rhenium45, potassium bubbles46,47, carbides48 and/or oxides49 prior to thermomechanical processing can stabilize the obtained dislocation structures and LAGBs thus increasing the recrystallization temperature, or alternatively, carefully controlling the recrystallization texture while maintaining a high purity sample19,50,51 or adding extremely high amounts of rhenium52,53 can keep RT tensile ductility even at the recrystallized state, these methods are costly, hard to control, and/or only having limited effects. The above are for refractory metals or dilute alloys, still less, for high Mo+W RCCAs with severer lattice distortion, cracks may develop during hot working30,54 because the elevated temperature ductility of these oxygen embrittled RCCAs is still marginal in tension27 and compression27,55, or, even after successful hot working, the RT ductility remains limited56 for subsequent cold processing.

Therefore, the composition design of the base RCCA should only focus on alloy systems with intrinsic ductility, ensuring the applicability of recrystallized alloys and processability of as-cast alloys. This is the former category that was proposed at the beginning of this note, in which a combination of good intrinsic ductility and high-temperature strength is endowed to Nb-based alloys57, Ta-based alloys58 and (V)NbTa-based RCCAs59,60, and oxide-induced embrittlement takes place more often than atomic-form oxygen induced embrittlement. Cracks can preferentially propagate along GBs decorated with coarse oxides such as HfO23,61-63 (Nb-Hf alloys C103 and C3009, and Ta-W-Hf alloy T-111), ZrO2 or TiO64 (V40Nb40Ta10Ti10 RCCA), which form via internal oxidation61 during casting, heat treatments and/or creep test (Nb45Ta25Ti15Hf15 RCCA, creeped even in argon atmosphere3). This internal oxidation arises from the reaction between oxygen coming from feedstocks or environment, and IVB-group elements in these alloys which serve as strengtheners but have highest affinity with oxygen5. Dissolution of the large-radius IVB-group elements into VB-group element matrix can first result in an enhanced oxygen solubility at low IVB element concentrations (~2 at.%) due to the expansion of the body centered cubic (BCC) lattice65,66, but a drastic decrease down to negligible oxygen solubility would then occur for higher IVB element concentrations (10~15 at.%) owing to high formation potentials of oxides65. Under external stresses, GB oxides can selectively decohere from the BCC grains along metal-oxide interfaces with specific terminating layer that has ultra-low work of separation (e.g., NbBCC-OHfO2 layer in C-103 alloy)2, leading to GB microcrack coalescence and embrittlement.

Of course, this correlation also has exceptions. For alloys in this compositional space but prepared via ultra-high cooling rates (e.g., quenching, additive manufacturing), embrittlement by oxygen in atomic form and smooth intergranular fracture surfaces without the trace of oxides can be observed in V3Nb4Ta4Ti1 RCCA67, Ti1Zr1Hf1V0.5Nb1Ta1Mo0.5 RCCA55, Nb-Ti-Al alloy10 and even commercial Ti68.

To address the oxide-induced embrittlement, wrapping the alloy in reactive or rare-earth element foils during heat treatments can effectively absorb oxygen, prevent intergranular brittleness and achive high RT tensile ductility (Zr foil on V40Nb40Ta10Ti1064; Y foil on V3Nb4Ta4Ti167; Ta foil on Nb-1Zr69). Nonetheless, this strategy only prevents the formation of oxides during heat treatments of an oxide-free as-cast ingot, and might be impractical for certain as-cast RCCAs possessing even higher sensitivity to GB oxide formation with pre-existing GB HfO2/ZrO2 in as-cast ingots. This is because it is energetically unfavorable for foils to scavenge oxygen out of these two oxides which have the lowest formation energy among most metal oxides over a wide temperature range5,70.

Furthermore, oxide formation, evolution and its embrittling mechanisms remain insufficiently understood in as-cast state. Unlike most cases where HfO2/ZrO2 precipitate from the solid BCC matrix during sintering or heat/thermomechanical treatments (typically in their stable monoclinic form2,71), during solidification process along with complex solute redistribution and continuous cooling, oxide precipitation from the liquid72 and potential polymorphic transformations may be involved. Oxides have only been studied as black-boxed normal brittle particles in these refractory systems without the knowledge of the influence of their internal structural changes on the extent of embrittlement.

Carbon microalloying strategy have thus far only overcomed/mitigated intergranular brittleness in intrinsically brittle systems. No matter implemented as direct addition of atomic C to compete for the GB atom sites against O9,35, or as addition of carbides to dissolve harmful atomic O into the carbides to form oxycarbides73, this strategy only yields relative improvements of ductility in RT compression, RT bending and 150℃ tension. Although this strategy is cost-effective, whether it can apply to those intrinsic ductile RCCAs with high oxide formation tendency and obtain RT tensile ductility is still unknown, which is eventually proved to be positive by this study. In another aspect, for the sake of high-temperature strength, carbon alloying in traditional refractory alloys often focus on carbide precipitation and does not harm the RT tensile ductility, while in the RCCA community, too much focus on BCC-carbide eutectic systems resulted in a series of RCCAs with extraordinary high-temperature strength but mere RT compressibility74-83, which are actually inapplicable. Therefore, it is of substancial significance to introduce carbide-precipitation strengthening into RCCAs by carbon microalloying without cancelling off the oxygen scavenging and ductilisation effect brought by the same strategy.

For another compositional space of RCCAs, the Ti-Zr-Hf-Nb-Ta alloy family, the sensitivity to oxygen embrittlement is rather low due to the high oxygen solubility in these IVB-group-element-dominated alloys. This is demonstrated by the ultra-high oxygen content threshold for RT tensile embrittlement84, and the embrittlement at moderately-high oxygen contents only at cryogenic temperatures85. Also, the brittleness usually takes the form of transgranular cleavage84,85, which can be overcomed during hot working, not like intergranular brittleness. However, compositions in this alloy family should not be adopted for the design of high-temperature RCCAs, because this alloy family possesses drastically diminished strength with increasing temperature86 due to overly high content of IVB-group elements87. Therefore, the optimal choice for the alloy family aimed at high-temperature use in this study is (V)NbTa-based RCCAs. A more detailed compositional design is described in the ***introduction*** of the main text.

**Supplementary Note 2 | *In-situ* annealing and microstructures of the alloy ingots**

During the final remelting process, the melting current was gradually reduced from high power to 25% at a 30-second interval, maintaining top part of the ingot in liquid form to *in-situ* heat treat the majority of the solidified ingot to achieve desired microstructures27. It is this tuned microstructure at the center parts of the ingot that achived optimal carbide-decorated subgrain boundary networks, otherwise the comprehensive properties of the carbon microalloyed RCCA would be less favorable.

As shown in Supplementary Fig. 2, the microstructures at different positions of the as-cast 0.8C alloy ingot are highly heterogeneous due to different solidification conditions and different extents of *in-situ* annealing at each position. A description of Supplementary Fig. 2 is written as follows:

**a**, Schematic diagram illustrating the distribution of different microstructures across the whole vertical cross-section of the cast ingot.

**b**, Experimentally observed macrostructures of the etched vertical cross-section of the ingot, in an optical stereomicroscope (Leica, M125).

**c**, Observation of a selected area in **b**, in an optical microscope (OM, OLYMPUS, EMP2000). The five distinct microstructural regions are:

1—Chilling zone with fine solidified dendrites at the bottom of the ingot adhering to the water-cooled copper crucible. This is the initial solidification zone of the last remelting, and the subsequent *in-situ* annealing had nearly no effect on this region due to the long distance from the top of the ingot and the continuous cooling effect of the crucible.

2—Solidified dendrites coarser than (1). *In-situ* annealing had no to little effects.

3—Equiaxed grains containing subgrains. This region underwent complete *in-situ* homogenization.

4—Equiaxed grains simultaneously containing dendritic structures and subgrains. This region underwent incomplete *in-situ* homogenization due to prior melting and insufficient time for diffusion after the liquid-solid interface advanced further upward.

5—The top of the ingot, with quiaxed grains containing subgrains only. This region underwent complete *in-situ* homogenization due to low cooling rate and prolonged time for diffusion.

**c12**, SEM image showing interdendritic carbide clusters within the fine solidified dendrites.

**c2**, A deliberately defocused OM image to better show the dendritic structures.

**c21**, EDS mapping of metallic elements in the solidified region. W and Ta segregate in dendrite arms, whereas Hf and Nb segregate in interdendritic regions. This applies to both 0.8C and 0C alloys, and is consistent with the calculated results in Extended Data Fig. 4c.

**c22**, SEM image showing interdendritic carbide clusters within the coarser solidified dendrites. These carbide clusters are also coarser, likely due to the slower cooling rate and/or a slight degree of *in-situ* homogenization.

**c3**, OM image showing equiaxed grains containing subgrains in the completely homogenized region at the mid-height of the ingot.

**c31**, SEM image demonstrating that the interdendritic carbide networks had evolved into the subgrain boundary carbide networks. The carbides exhibit fine sizes individually, and a chain character collectively, which is consistent with Extended Data Figs. 7g-i.

**c5**, OM image showing equiaxed grains containing subgrains in the completely homogenized region at the top of the ingot.

**Supplementary Note 3 | Local deformation behaviors of 0C alloy**

For the fractured 0C alloy in RT tension in a brittle manner, misorientation angles between the geometrically separated parts along the primary crack (Extended Data Figs. 2a, e) are mostly ≥ 15°, verifying the intergranular failure mode at high angle grain boundaries (HAGBs). A minor part of these angles are ≤ 10° (Extended Data Fig. 2e) and correspond spatially with the strained areas in the grain reference orientation deviation (GROD) map (Extended Data Fig. 2c), which indicates very limited local regions of plastic deformation instead of direct crack propagation along low angle grain boundaries (LAGBs). Selected grains containing slip traces (Extended Data Fig. 2d) happened to be ideal for slip system activation analysis due to mere incipient plasticity88-90. Single (01)[11] planar slip with straight slip traces can be observed in the center region of grain 1 (G1) (Extended Data Fig. 2f), whereas non-coplanar double slips of (01)[11] and (112)[11] are also present, which cannot be cross slip due to different Burgers vectors. In the left region of G1, cross slips occurred between (01)[11] and (110)[11], based on identical Burgers vectors and the successive zig‑zag trajectory of the straight slip traces (Extended Data Fig. 2f). This {110} slip system coexisted with (21)[11] planer slip. Other double slips observed include (21)[11] + (1)[11] (in G1) and (121)[11] + (13)[11] (in G7). In G2, G4 and G5- G7, traces with {112} plane trace directions can either be {112} slip (with misorientation < 1°) or {112}<111> twinning with 60° misorientation91,92 (Extended Data Fig. 2f). {112} twins with two variants (Extended Data Fig. 2p) and wider widths are also present (Extended Data Figs. 2m-o) in a coarser grain where twins have lower critical activation stress93. Slip transfer across the matrix and one twin variant, as (10)[11]Matrix ↔ (101)[11]Twin (Extended Data Fig. 2m), although unavoidably triggered some extent of dislocation pile up (due to resistance to this transfer) and interfacial strain concentration94 (Inset of Extended Data Fig. 2p), it did, on the other hand, alleviate local stress concentration and continued the plastic deformation by adopting new favourable slip planes in the rotated lattice95. Notably, the twin tips caused significant level of stress concentration96 and activated more slips (white circle in Extended Data Fig. 2m). There’re also minor casting shrinkages (Extended Data Fig. 2m, and G1 in Extended Data Fig. 2f), but the surrounding matrix buffered the development of the voids by plastic deformation, and no further void coalescence or cracking were present around these shrinkages. In all, the diverse deformation behaviors shown above demonstrate good intrinsic ductility within each grains of 0C alloy. Indeed, the averaged valence electron concentration (*VEC*) of 0C alloy is 4.92, even lower (roughly implying better intrinsic ductility21,97) than the ductile VNbTa RCCA98,99 (*VEC* = 5). Therefore, the origin of RT brittleness of 0C alloy is only related to GBs (Fig. 2a). However, the GB separation is not due to poor polycrystalline deformation compatibility, for the averaged Taylor factor *M* (Extended Data Fig. 2k) of the whole map is 2.753 (Supplementary Fig. 4a) (concerning {110}, {112} and {123} slips), which is very close to the typical value of well-compatible untextured BCC polycrystals (*M* = 2.754)100.

It is worth noticing that 0C alloy exhibited typical pencil glide and non-Schmid deformation behaviors. Slip in non-close-pakced BCC crystals occurs along <111> directions but on indeterminate planes that all have high critical resolved shear stress and contain the slip direction101, with the relatively dense {110} planes engaging the most and few-to-no {112} planes at low homologous temperatures including RT102. These genuine, atomic slip planes alternate by frequent cross-slips at a (sub-)nanometer scale102,103 in order to get an averaged plane along or near maximum resolved shear stress plane (MRSSP) under certain loading conditions, which can be non-crystallographic101,104. {112} and {123} slip planes can be derived from alternating {110} slip planes105. Thus, the mesocopically straight slip traces under EBSD (even the microscopically straight planar slip bands under TEM) were actually the averaged, crystallographic slip planes103,104. It is now explainable that high proportions of {112} and {123} slips occurred at RT in a poorly-activated 0C alloy without macroscopic yielding (Extended Data Fig. 2f) because they are not necessarily genuine. It is also explainable that mesoscopically wavy slip traces (Extended Data Fig. 2m) are either a manifestation of pencil glide and cross-slips at a larger scale106 and/or lattice rotation, and the unidentifiable traces (G3 and G5 in Extended Data Fig. 2f) belong to higher-order averaged slip planes (e.g., {134}) or completely non-crystallographic ones104. Compared to pure BCC metals or dilute alloys, RCCAs are especially prone to undergo frequent (sub-)nanometer cross-slips and exhibit mesoscopically straight slip traces due to local chemical complexity106,107, as proved by the dominant straight traces of the grains (Extended Data Fig. 2f).

However, the mesoscopic slip planes still have large deviations from MRSSP. The maximum Schmid factor (*SF*) for {110} slip of G1 was lower than {112} or {123} slip (Extended Data Figs. 2g-j), but G1 was experimentally observed to be rich in {110} slip (Extended Data Fig. 2f). Similar phenomenon applied to G4, G6 and G9 (Extended Data Figs. 2f-j). A large proportion of the activated slip systems of all the selected grains were not the slip system with maximum *SF* within all potential {110}, {112} and {123} slip systems, even not the maximum within the same slip plane family (Table S3), which is commonly seen in the deformation of other BCC metals and RCCAs89,108. This non-Schmid behavior further influences slip transfer across GBs. The geometrical compatibility factor *m*’109 calculated based on activation of slip systems with maximum *SF* was very low for the GB between G8 and G9 (Extended Data Fig. 2l). However, transferred slips was observed in G9 from GB into the interior (Extended Data Fig. 2f), which is especially abnormal after taking into account the incipient plasticity. Twinning-antitwinning (T/AT) asymmetry between the positive and negative <111> shear directions on {112}BCC23, as well as the non-glide stress components110 applied perpendicular to {110}, {112}, {123} and all other slip planes on the non-planar BCC screw dislocation cores, lead to variations in local stress tensors and Peierls barriers23, and/or deviated dislocation trajectories111, ultimately causing non-Schmid deformation behaviors. Apart from the above factors, Schmid law can also be violated by polycrystallinity itself due to compatibility issues103,108, or by the competition from slip systems beneficial for GB slip transfer106. In addition, coarser grains usually possess more different microscopic stress states from the global state than finer grains, and activate slip systems with extremely-low *SF*s112, which is consistent with G1 (Table S3). It is known that pencil glide lowers the *M* value of untextured BCC polycrystals from 2.754 to 2.733 (more compatible)100, whereas non-Schmid deformation in some cases can promote crack tip shielding113, but 0C alloy still fractured at a rather premature stage. Therefore, the RCCA designed to be intrinsically ductile was severely hindered by its dominant extrinsic GB brittleness, which is the sole origin of the brittleness.

**Supplementary Note 4 | Morphology and growth mechanisms of GB HfO2**

In the ***main text***, the dense layer covering the intergranular fracture surfaces in 0C alloy is determined to be m-HfO2 in dendritic morphology caused by specific growth conditions. However, rigorous demonstration is needed.

Firstly, these dense dendrites are not from the alloy matrix, because the tensile samples were sectioned from the mid-height of the ingot where grains had been fully *in-situ* homogenized without dendritic structure/segregation (Supplementary Fig. 2c). Another proof is that on the fractured surface of another tensile sample which had partial regions of casting shrinkages, similar “dendritic structures” appeared inside the bridged positions (last solidified positions) of premature, exposed, spherical alloy dendrites (Supplementary Figs. 5b, c), which indicates that these two “dendrites” are not the same thing and are at different dimensional scales. Under SEM-EDS, the “effective” (unspalled) parts of these dendrites are observed to be rich in Hf and O, relatively depleted of Nb, Ta, W (white lines in Figs. 2d, h), and is consistent with the more spatially resolved TEM-EDS (Extended Data Figs. 3b, h). The semi-quantitative composition (Supplementary Table 4) points to a conclusion that these are HfO2 dendrites in themselves, exceeding the detection limit of XRD (Supplementary Fig. 1).

Secondly, the formation and growth of the GB HfO2 in this study is unique, for the first time in RCCAs the dendritic morphology of HfO2 is reported and is caused by solute supersaturation. In other studies containing melt-based preparation instead of HfO2/ZrO2 precipitation during solid-state heat/thermomechanical treatments, HfO2/ZrO2 formed as the primary phase from the liquids in electron beam welding (EBW) of C-103 alloy72,114 or electron beam melting (EBM) of Cb-752 alloy71, whereas in other cases ZrO2 was precipitated from the fully solidified BCC matrix in Nb521 alloy115. The former is because the liquidus temperature of the base BCC phase is too low in niobium alloys, whereas the latter is due to the rapid solidification in additive manufacturing (AM). In 0C alloy, however, HfO2 was most likely to precipitate from the remaining liquids at the final stage of solidification, which also rendered its dendritic nature. Integrating the experimentally measured O content 99 wppm (0.09 at.%) of 0C alloy, Extended Data Fig. 4a shows a sudden occurrence of high temperature t-HfO2 from the last liquids in equilibrium cooling. Although the volume fraction of BCC phase also increased upon the emergence of t-HfO2 (Extended Data Fig. 4a), eutectic reaction can be excluded by the experimental morphologies (Fig. 2). Only minor Hf was in BCC phase during early stages of solidification (Extended Data Fig. 4c), which is more evident in actual non-equilibrium cooling, causing Hf segregation in the interdendritics and GB regions where the residual liquids retained (Supplementary Fig. 2c21). The oxygen in the completely solidified BCC phase only accounted for ~20% of total oxygen content (Extended Data Fig. 4c), implying ~80% O in the retained liquids at the final stage of solidification. This can be further attributed to the extremely low solubility of O in high temperature BCC phase (Extended Data Figs. 4d-f), which is a common phenomenon in high-hafnium (Nb/Ta)-Hf systems65. This co-segregation of Hf and O at GBs and interdendritic regions, and ultra-high level of O supersaturation (~30 at.% in Extended Data Figs. 4d, e, even higher for non-equilibrium conditions) favoured direct precipitation of HfO2 from the liquids instead of coordinated eutectic growth. The driving force for precipitation was further boosted due to the supersaturation, leading to “kinematic roughening”116 of the interface between the growing HfO2 and the liquids. Thus, rough interfaces by continuous adhesive growth were formed, instead of crystallographically faceted interfaces by spiral growth or 2D-nucleation growth116,117, the latter of which being common for oxides and other ionic compounds (with Jackson’s factor *α* > 2) if not concerning the driving force. After adopting rough interface for growth, dendritic morphology is not uncommon for solidified oxides118-120, depending on local thermal gradients during cooling. Indeed, in the shrinkage region, HfO2 adhering to the outer surface of the exposed alloy dendrites exhibited faceted morphology (Supplementary Figs. 5f-l), where the chemical supersaturation had not been significant, due to the absence of spatial confinement in the surrounding liquid or sufficient solute rejection from ripe alloy dendrites. In contrast, HfO2 inside the bridged positions (last solidified areas) of the alloy dendrites exhibited dendritic morphology (Supplementary Figs. 5c, f).

Thirdly, the formation of the dendritic morphology of HfO2 is only attributed to the above liquid-phase-precipitation growth factor, not to other potential reasons. Solid-state GB precipitation still has some possibility to be dendritic morphology121,122, but severe supersaturation would lead the onset of the HfO2 precipitation process ahead of the completion of BCC solidification. On the other hand, some HfO2 dendrites possess clear structures of primary, secondary (and tertiary) dendrite arms (Figs. 2e-h) and in some cases are regularly aligned, with symmetry of near-90° or specific angles (Figs. 2e, g and Supplementary Fig. 5e). Although processes such as tetragonal to monoclinic (t→m) martensitic transformation of t-HfO2123 and ferroelastic domain switching of stabilized t’-HfO2124 would also generate a near-90° (or specific angle) dendritic/herringbone structure, but the studied GB HfO2 exhibited such morphology due not to these factors. In these two processes, the matter in the interstices of the herringbone/dendrites is also HfO2123,124, whereas here it is BCC. The occurrence of BCC can be inferred from the discontinuity of HfO2 (Extended Data Figs. 3a, b), and from its deformability to form tear ridges (Fig. 2i) which is not possible for oxides.

Fourth, the over-proliferation of GB HfO2, mentioned in the ***main text*** acting as an aggravating factor to the microscopic plastic deformation localization in the tiny interconnecting BCC channels and interfacial cracking of BCC-HfO2, needs to be analyzed because the total oxygen content is only 99 wppm (around the critical value between commercial purity and high purity). In literature, this is attributed to the coexistence of Hf and W. Observable GB oxides were neither found in annealed Ta-10W nor Ta-2Hf alloy, but were found in Ta-8W-*x*Hf and Ta-4W-*x*Hf (*x* ≤ 2) ternary alloys, with larger oxide volume fraction and higher brittle fracture propensity as *x* increases125. This was said to be attributed to the segregation of W towards dendritic arms (as also the case in this study, Supplementary Fig. 2c21) that further promoted Hf’s tendency to segregate towards the last-solidified regions to generate riper oxides. And it was also attributed to the lattice contraction upon adding small sized W atoms to the solid solution, causing the larger Hf atoms to segregate to misfit (dislocations) or GBs125.

**Supplementary Note 5 | Crystallography and phase transformation of GB HfO2**

The precipitated t-HfO2 dendrites fully transformed to stable m-HfO2 at ~1900 ℃ (Extended Data Fig. 4a), without any residual t-HfO2 as demonstrated by nano-beam diffraction (NBD) (Extended Data Figs. 3c, i) and EBSD indexing (Figs. 3a, a1). The completeness of the transformation is possibly due to the absence of nanocrystallinity126 or high compressive stress127 from the relaxable BCC phase at high temperaturess to stabilize the tetragonal phase. The t→m transformation in this study follows typical martensitic characteristics, as evidenced by the regularly alternating monoclinic variants128 (Fig. 3d, Supplementary Fig. 6c and Supplementary Fig. 7c) with specific misorientations notably frequent in 90° and 180° (Figs. 3a, a2, d). During t→m martensitic transformation, the monoclinic daughter grains can align either of their three axes (am, bm and cm) to the unique ct axis of the tetragonal parent grain, forming A, B and C types of correspondence, respectively128. Within each correspondence, the other two monoclinic axes have the freedom to align with the two equivalent tetragonal axes (at and bt), leading to a 90° variant relationship inherited from the symmetry of the parent phase129. On the other hand, due to the monoclinic distortion (*β*m = 99.18° for m-HfO2), there is not even 2-fold symmetry except along bm axis128. Hence, monoclinic daughter grains with bm aligned to one of at and bt (e.g., bm // at), and another axis (e.g., am) aligned with the other equivalent tetragonal axis (am // bt), marked as BAC variant in the Hayakawa notation130, is distinct from C variant, and has a misorientation angle of 180° along ct. The 90° variants are crystallographically coincident to be regarded as twins reflecting about {110}m or {011}m, whereas the 180° variants are twins about {100}m or {001}m (namely, ±(100)m and ±(001)m)128. This is verified by clear twin diffraction spots (Extended Data Fig. 3k) and mirror-reflected lattices with naturally faulted layers across the twinning plane ±(100)m (Extended Data Fig. 3l). Different Kikuchi patterns (KPs) of the m-HfO2 grains (Extended Data Fig. 3j) reveal profuse variant distribution. The sizes of most variants (tens of nanometers, Extended Data Fig. 3j) are also consistent with the traces observed on fractography (Fig. 2i). Therefore, the frequent occurrence of these twinned variants implies that the experimentally indexed m-HfO2 underwent t→m martensitic transformation instead of direct precipitation. However, directly precipitated m-HfO2 can also have 90° and 180° growth twins131 by inheriting the orthorhombic symmetry of BCC phase. Fortunately, this can be excluded by CALPHAD (Extended Data Fig. 4a), as well as the following analysis: Shear-generated variants with these two misorientations (especially 180°) can cancel off a great extent of the strain generated during the volume expansion of t→m transformation128, whereas in a nucleation-precipitation process this is impossible, thus happens far less frequent, if any.

To gain further insight into the evolution of HfO2, orientation relationships (ORs) between t-HfO2 – BCC and m-HfO2 – BCC are essential, which serves as one of the foundations for the oxide embrittlement mechanisms in the next chapter. However, the analysis of t-BCC and m-BCC ORs are complicated by the multiple t-m ORs, as evidenced by the following. Statistics of m-HfO2 GB angles (Fig. 3a2 and Supplementary Fig. 9) show frequent occurrence of 80°, 90°, 115~120°, and 180°, which is exactly the angles of the “operators” among monoclinic variants after martensitic transformation129,132. This not only proved the reliability of the EBSD data at such confined scales, but also demonstrated that the monoclinic variants adopted multiple correspondences and orientation relationships (ORs) with the parent tetragonal grains, because 120° only occurs between variants with different correspondences129, and 80°, 115° only between different ORs132. Due to *β*m ≠ 90° and the impossibility to simultaneously align all three monoclinic axes with the tetragonal ones, a (*β*m − 90)° (~10°) distortion angle between either (100)m or (001)m and {100}t/(001)t can occur depending on type-I or type-II OR, leading to all six ORs of A1, A2, B1, B2, C1 and C2, with a total of 24 variants128,129 and generating those operators apart from 90°/180°. Under multi-OR conditions, parent grain reconstruction, which can reveal the t-BCC ORs, is impossible in this study, due to the chain-like (2D cross-section) GB m-HfO2 having a lack of sufficient contiguity among the variants to be utilized in the reconstruction algorithms132,133.

Nevertheless, both t-BCC and m-BCC ORs can be directly indicated from the m-BCC pole figures (PFs). As evidenced in Figs. 3e-g, Supplementary Figs. 6d-f and Supplementary Figs. 7d-f, a (near-)coincidence of either {001}m, {010}m or {100}m poles with {011}BCC poles from the BCC grain on one side of the GB is present, after statistically analyzing three different GB triple junctions and allowing ~15° orientation deviation. Within the pole figures containing coincidence, for any pair of monoclinic planes and directions with the same Miller index, one of them would occur closer to the corresponding BCC pole (0~15°), and in many cases the other would occur with higher orientation deviations (10~20°). For example, the light blue <001>m poles are closer to one <011>BCC pole, but it is more distant for {001}m-{011}BCC (Fig. 3f). Inversely, the green {001}m poles are closer to one {011}BCC pole, but it is more distant for <001>m-<011>BCC (Fig. 3g). This is due to the ~10° distortion upon the inheriting of monoclinic axes/planes from the tetragonal ones129 (Fig. 3i), the latter of which possessing real ORs with BCC during the final stage of solidification. Furthermore, it is normal for some degrees of deviation from the ideal t-BCC OR to be present, accounting for larger deviations between m-HfO2 and BCC. The above is consistent with the TEM observations: Simultaneous perfect parallels of zone axes and planes between m-HfO2 and BCC were scarce, e.g., a [110]BCC // [100]m (Extended Data Figs. 3a, c) would lead to some small angles between (10)BCC - (001)m, and (001)BCC - (010)m (Extended Data Figs. 3e, f). Although the deviation angle illustrated in IFFT appears significantly reduced due to the algorithmic nature of this all-area IFFT imposed on these two inclined crystals (Extended Data Figs. 3e, f), the true deviation angle shown in FFT is measured to be 11° (Inset of Extended Data Fig. 3f), which is highly consistent with the theory. Interfacial periodic misfit dislocations were generated (Extended Data Figs. 3e) to accommodate this semi-coherent interface which is geometrically ledged, crystallographically inclined, and atomically misfitting (Extended Data Figs. 3d, *d*(001)m = 0.262 nm, *d*(10)BCC = 0.236 nm, misfit *δ* = 11.02%).

If taking the Bain OR between tetragonal HfO2/ZrO2 and BCC, {011}BCC // {100}t, <001>BCC // <001>t134 (Supplementary Table 5), all the (near-)coincidence observed in the BCC-m pole figures can be explained at once. This OR was possibly necessitated by minimum interfacial misfit and best wettability for heterogeneous nucleation sites from the liquids, and is visualized in Fig. 3i. Then, the {001}m/{010}m/{100}m ≈// {011}BCC (≈// for near-parallel) was the direct consequence of monoclinic planes freely inheriting any of the corresponding tetragonal planes with or without ~10° distortion (Figs. 3e-g, Supplementary Figs. 6d-f, Supplementary Figs. 7d-f). <001>m/<010>m/<100>m ≈// <001>BCC is another consequence, but less frequent, because only those inherited ct (correspondence C) are compatible (Fig. 3h, Supplementary Figs. 9a-c, Supplementary Figs. 6g-i and Supplementary Figs. 7g-i). These two basic BCC-m ORs are also consistent with [115]. Then, {011}m/{101}m/{110}m ≈// {001}BCC, as well as {011}m/{101}m/{110}m ≈// {111}BCC (Supplementary Figs. 9g-l, Supplementary Figs. 6m-r and Supplementary Figs. 7m-r), originate from crystal symmetry and can be derived from the basic ORs, with the former applicable to partial variants underwent {011}m/{101}m/{110}m ≈// {110}t, and the latter to partial variants underwent {011}m/{101}m/{110}m ≈// {101}t. Indeed, if constricting to the basic ORs with a tolerance angle of 15°, the majority of the monoclinic grains can have a delineated phase boundary with one BCC grain on either side of the GB (Supplementary Fig. 10). The analysis for the m-BCC pole correspondences and ORs are reliable for the following reasons: (1) Pseudo-coincidence between m-HfO2 grains and BCC grains without geometrical adjacency was excluded, such as the near-coincidence between one G3-{110}BCC pole and the green monoclinic poles at the right of the pole figure (Fig. 3e). The red circles in it only represent the coincidence between the deep purple monoclinic variants and G3 which are abutting. (2) The pole figures having hardly any coincidence, such as {001}m/{010}m/{100}m superimposed by {111}BCC, are the same for all three triple junctions (Supplementary Figs. 9d-f, Supplementary Figs. 6j-l and Supplementary Figs. 7j-l), whereas the pole figures having other prolific coincidence are also the same for all three triple junctions, such as {011}m/{101}m/{110}m superimposed by {111}BCC (Supplementary Figs. 9j-l, Supplementary Figs. 6p-r and Supplementary Figs. 7p-r). The validity of the previous analyses can be further manifested in that the dark purple and light purple monoclinic grains only have ORs with G3, and the rest only have ORs with G1 (Supplementary Fig. 10), which is consistent with Figs. 3e-h and Fig. S10. To conclude, the high temperature t-HfO2 precipitated from the remaining liquids adopting Bain OR, and after t→m martensitic transformation, m-HfO2 exhibited ORs with BCC as {001}m/{010}m/{100}m ≈// {011}BCC, <001>m/<010>m/<100>m ≈// <001>BCC (Fig. 3k), which provides the basis for further analysis of the degradation of interfacial bonding between BCC matrix and the oxides, and the embrittlement mechanisms, in the ***main text***.

**Supplementary Note 6 | Macroscopic deoxidation**

Quantitative measurement of averaged oxygen and carbon content of 0C, 0.2C, 0.4C, 0.6C, 0.8C and 1C alloys were shown in Extended Data Figs. 5b, c. For C addition ≤ 0.4 at.%, the O content is even higher than 0C alloy, which can be explained by the high oxygen content inherently present in the commercial TaC pellets135 as feedstock for arc melting. For C addition ≥ 0.6 at.%, the O content drastically decreases, which corresponds well with the gained tensile ductility at RT (Fig. 1a). Unlike electron beam melting (EBM) or consumable vacuum arc remelting (VAR) with an ultra-high vacuum of 10-4~10-6 Pa136 and a continuously operating vacuum pump, where oxygen impurities tend to be removed by degassing process from the metal molten pool under low O2 partial pressures1,137, the laboratory-scale non-consumable electrode arc melting (PAM) used in this study has lower levels of vacuum (2~3×10-3 Pa) and is backfilled with Ar, so that O2 partial pressures are high and the degassing process is thermodynamically difficult to happen1. Furthermore, with high Hf content in the RCCA composition, the majority of the potentially generated oxides are HfO2 due to highest affinity of Hf with O5, which does not have any volatile suboxides138 and is non-volatile in itself (boiling point 5400 ℃), excluding the sacrificial deoxidation mechanism138. Nevertheless, temperatures in the molten pool under the tungsten arc can be as high as 3500~4000 ℃, melting the feedstocks including TaC and forming a reducing environment rich in dissolved active [C]inmelt. The reaction between [C]inmelt and dissolved active [O]inmelt has a thermodynamic equation of [O]inmelt + [C]inmelt = CO(g)↑, with Δ*Gθ* = − 43.95T − 66109 J/mol137, which is increasingly favourable at higher temperatures. CO(g) is inert to, and insoluble in high temperature metallic species and would be degassed, therefore reducing the total oxygen content139. Despite the lack of database for [O]inmelt, calculated free energy curves of oxygen combined with Hf and C (for same oxygen molar content) via HSC Chemistry software is still meaningful for mutual comparison using O2(g) as reactant (Extended Data Fig. 5a). It is revealed that at temperatures ≥ 2500 ℃, the propensity of oxygen to be combined by carbon exceeds that of by Hf (Extended Data Fig. 5a), let along other metallic elements. However, this reaction is effective only when [C]inmelt is abundant137, which accounts for the inability of 0.2C and 0.4C alloy to decrease the total oxygen content. This is also consistent with the trend that the actual C content for the alloys in the range of 0.4C~0.6C increased more slowly than nominal (Extended Data Fig. 5b) due to the consuming of carbon to realize deoxidation. Even if metal oxides had already formed, excess [C]inmelt can still reduce them into carbides or pure metals via carbothermic reduction140,141, which also has negative Δ*G* and is thus spontaneous at high temperatures (green line in Extended Data Fig. 5a), as long as the process is still in liquid phase.

**Supplementary Note 7 | Microscopic scavenging of oxygen**

In the ***main text***, the complete elimination of GB HfO2 oxides and replacement by GB FCC-MC carbides are said to be observed at both high and (quasi-)low grain boundaries. The supporting details are as follows. When the BCC grain on the upper side of a GB was exactly under [100] zone axis (Fig. 4d), the Kikuchi pattern (KP) of the BCC grain on the lower side was far from any <100> zone axes (Fig. 4d1); also, when the BCC grain on the lower side of another GB was exactly under [311] zone axis (Fig. 4k), the BCC grain on the upper side exhibited diffraction spots (in KP) with <311> characteristics but rotated to a different angle (within <311> family but a different specific axis) (Inset of Fig. 4g). These, together with the 40.4° and 56.7° GB misorientation angle observed by EBSD (Fig. 4b and Supplementary Fig. 14b), demonstrate that these are high angle grain boundaries (HAGBs). On the other hand, the quasi-low angle (15.03°) of another GB is determined by EBSD scanning of the TEM foil perforation in advance (Supplementary Fig. 11a).

For the mechanism of oxygen scavenging by FCC-MC, actually, this is only possible if FCC-MC precipitated in the liquids ahead of potential oxides, and has been proved by CALPHAD results. For equilibrium thermodynamics, although FCC-MC (e.g., HfC) had even higher melting point than HfO2 (3900 ℃ vs 2758 ℃), it was formed at lower temperatures than HfO2 and only in solid-state precipitation (Extended Data Fig. 4b), which is attributed to the far higher solubility of C in the liquids than O (Extended Data Fig. 4d) to temporarily prevent liquid phase carbide precipitation. However, for the actual non-equilibrium continuous cooling during casting, more severe segregation would retain higher concentrations of Hf and C in the remaining liquids, ultimately exceeding the solubility. Due to the lack of Scheil + back diffusion model in CALPHAD, a calculation based solely on Scheil model gave erroneous results with the emergence of hexagonal close-packed (HCP) phase and no oxides for both 0C and 0.8C alloys (Supplementary Figs. 13a, b). Nevertheless, the results do indicate that a part of FCC-MC first precipitated from the liquids (Supplementary Fig. 13b), and it was not eutectics due to the morphology shown in Supplementary Figs. 12a-f. This offers great chances for oxygen scavenging, otherwise after the formation of HfO2, it was difficult to “re-scavenge” the oxygen in solid state, even for the minor carbothermic reduction, due to the lack of active [C]inmelt. The O-rich HCP phase (Supplementary Fig. 13c) is *α*-Hf in the model, but it should be HfO2 after modified by the experimental findings. Despite the affinity of Hf (and all refractory elements) with C being lower than that with O over a wide temperature range5 (Extended Data Fig. 5a), the precipitation of HfO2 was inversely later than FCC-MC (Supplementary Fig. 13b) due to the abundance of C addition and thus higher chemical potential for MC formation. If considering the further decrease in Gibbs energy after O dissolution into FCC-MC142, HfO2 formation would be further suppressed. After the continuous consumption of remaining O in the liquids, HfO2 ultimately tended to not precipitate at all, due to the O concentration reaching below the allowed solubility in the matrix (still of some value even in high-Hf BCC)65.

**Supplementary Note 8 | Determination of active slip systems and slip transfer**

In Fig.5, Deformation behaviors of 0.8C alloy in RT tension were studied after straining to 8% instead of incipient plasticity, as the high-density SGBs and other microstructural features would interfere with the observation of slip traces143, unlike 0C alloy (Extended Data Fig. 2 and Supplementary Note 3). The indexing of experimentally observed slip traces was done by a combination of intragranular misorientation axis (IGMA) analysis89 and minimum angular deviation matching between the experimental trace and all the possible theoretical traces of all the slip systems. For example, the activation of (2)[11] slip in G12 (Fig. 5n1) was first identified by angular comparison between the observed trace and all the possible traces for {110}<111>, {112}<111> and {123}<111> slips of G12 (Supplementary Fig. 15b). In the {011}, {112} and {541} pole figures of G12, the rotation focus can be found at (514) pole (circled in red) with near-invariant orientations across all grain regions (Supplementary Figs. 15e, f), demonstrating the dominance of intragranular rotation about [514] Taylor axis, which corresponds to one activated {123} slip system according to IGMA. Specifically, the cross product of the normal vector of the slip plane [2] and the Burger vector [11] yields a rotation Taylor axis of [], which is just consistent with the IGMA result. This verified the previously identified slip system. On the other hand, the focus poles in {011} and {112} pole figures (circled in blue) still had some degrees of rotation in themselves (Supplementary Figs. 15c, d), indicating the existence of some more dominant activated slip(s) other than {112} or {110} systems.

For the slip transfer across grains, various geometrical compatibility factors could be used to characterize its easiness, such as

*N* factor144

*N* = cos(*ψ*) ∙ cos(*κ*) + cos(*γ*) ∙ cos(*δ*) = () () + () ()

where *ψ* is the angle between slip plane normal directions of the two grains (and ), *κ* is the angle between slip directions (and ), *γ* is the angle between the direction of incoming slip and the plane normal of outgoing slip, and *δ* is the angle between the direction of outgoing slip and the plane normal of incoming slip.

*LRB* factor145,146

*LRB* = cos(*θ*) ∙ cos(*κ*) = () ()

where *θ* is the angle between the two slip plane intersections with the GB ( and ).

*m*’ factor109

*m*’ = cos(*ψ*) ∙ cos(*κ*) = () ()

Among these, *m*’ was adopted for its good reliability without the need to assess slip plane intersections with GBs via 3D-EBSD108, and the applicability to RCCAs109,147. Similar to 0C alloy, 0.8C alloy also exhibited non-Schmid deformation behaviors. For example, G9 had high {110} slip preference (Figs. 5e-h), whereas it activated {123} slip (Fig. 5l1). This is further shown in Supplementary Table 7. Therefore, considering the inaccuracy of slip transfer calculated from maximun-*SF* slip systems (Extended Data Fig. 2l), real identified activated slip systems were set as inputs for the STABiX toolbox148.

It is worth noting that compared to 0C alloy (Extended Data Fig. 2), 0.8C alloy exhibited reduced {112}<111> slip tendency (Fig. 5). This may be attributed to the altered dislocation core structures and thus changed Peierls barriers on different slip planes caused by the core-decoration effect of unprecipitated carbon interstitials149-151, or may be attributed to the increased generalized stacking fault energy (GSFE) of a 1/2<111> vector on {112} planes caused by compositional changes including interstitials and/or depletion of Hf in BCC solid solution89,90. But this is beyond the main scope of this study.

**Supplementary Note 9 | Potential intrinsic deformability of FCC-MC**

In the ***main text***, although a microscopic TEM study of the deformed 0.8C sample is absent, solid evidence in EBSD is that upon slip transfer across a GB with low *m*’ value and a chain of acicular FCC-MC carbides, no detrimental cracks were observed at this GB whereas densely paralleled slip traces were successfully transferred even at positions overlapping with individual FCC-MC carbides on the sample surface (Fig. 5k2). This points to the potential deformability of FCC-MC to transfer the deformation, which can be an intrinsic ability of this phase as long as its chemistry lies in certain compositional ranges.

Firstly, FCC-MC carbides have a NaCl-type B1 lattice structure that inherently has a ratio of *a*/*b* ≥ 0.5, indicating low Peierls barrier and good deformability152 (*b* is the magnitude of the Burgers vector, *a* is the lattice spacing of the slip plane). This resembles metallic behavior and is in sharp contrast with low-symmetric, nearly undeformable m-HfO2. Furthermore, in addition to the relatively stiff C-C and M-C bonds153, high proportions of M-M metallic bonds in FCC-MC carbides have non-directional nature and are rich in free electrons, thus can relax/accommodate the strain caused by dislocations154. The metallic bond fraction would not decrease even for FCC-MC with partial dissolution of O, or oxycarbides, as O only substitute for the C sublattice155,156.

Secondly, semi-quantitative TEM-EDS result of the GB FCC-MC gave an averaged composition of (Hf32.37Ta22.3Nb9.34W1.58)(C23.81O10.6) (Supplementary Table 6), which can be simplified into MC*y* (*y* ≈ 0.52), where M stands for all metallic species and C stands for carbon and other substitutive non-metallic elements on carbon sublattice. Although 0.52 << 1, this is a common phenomenon in transition metal carbides (TMCs) due to the propensity of metallic elements to occupy the C vacancies generated at high temperatures157 during precipitation. The structural stability of FCC-MC can be maintained as long as *y* ≥ 0.47~0.54158,159. This off-stoichiometry effect in turn increases the proportion of M-M metallic bonds and decreases the elastic modulus and yield strength of FCC-MC153, making it more compatible to deform with the alloy matrix. Alongside this, the salient Ta, Nb and W dissolution into FCC-MC (Supplementary Table 6) can potentially render it better deformability than pure HfC by decreasing the generalized stacking fault energy160, increasing the valence electron concentration (*VEC*)161,162 and promoting the {111}B1 slip163. According to the FCC-MC composition in Supplementary Table 6, its *VEC* is calculated to be 9.11, which falls in the relatively tough/deformable *VEC* range161.

With this intrinsic deformability, the actual deformation mode of this type of multicomponent FCC-MC carbide can be dislocation glide164 and/or faulting76.

**Supplementary Note 10 | Evolution and crystallography of FCC-MC**

Three important conclusions, (1) good coherency and registry of the intragranular BCC-MC interface under certain ORs, (2) lack of in-depth study of the BCC-MC ORs in the refractory community, and (3) refinement of MC at SGBs, can be found in this note, among which (1) and (3) are directly referenced in the ***main text*** as foundations for further analysis.

One GB FCC-MC had an orientation relationship (OR) with a BCC grain on one side of the GB as (01)BCC ≈// (11)FCC, [100]BCC ≈// [110]FCC (Figs. 4d, f). This seemed to roughly conform to Nishiyama-Wassermann (N-W) OR, {110}BCC // {111}FCC, <100>BCC // <110>FCC, which was originally defined to describe <110>BCC // <112>FCC165 but can be scrutinized using the crystallographically equivalent <100>BCC // <110>FCC166. The Kurdjumov-Sachs (K-S) OR, {110}BCC // {111}FCC, <111>BCC // <110>FCC167, specifies the same parallelism conditions between the two densely-packed planes of BCC and FCC as N-W OR, but has a slight deviation of ±5.26° (two variants) from each N-W variant when it comes to the parallelism conditions of crystal directions166,168. The diffraction spots in Fig. 4d are asymmetric with respect to the central transmitted spot, which was caused by [100]BCC and [110]FCC zone axes having a small deviation angle. Therefore, this GB FCC-MC might actually have K-S OR with the BCC grain on the upper side, but this remains speculative because zone axes of <111>BCC or <110>FCC could not be tilted to the beam direction for scrutiny. The phenomenon that {110}BCC and {111}FCC being strictly parallel in some cases (Fig. 4k) and not strictly parallel in other cases (~4°, Figs. 4d, f) is commonly seen in both shear-related BCC-FCC systems169 and precipitation-related ones (like in this study)170. This can be attributed to an energy compromise with other GB FCC-MC variants, and/or an inclined interface for enhanced growth kinetics170. However, another equally possible reason might be that the GB FCC-MC in Figs. 4d, f did not follow K-S OR, but instead followed an OR which does not specify parallelism conditions between {110}BCC and {111}FCC and also has a small deviation angle from K-S OR, such as the Pitsch OR, {110}BCC // {100}FCC, <111>BCC // <110>FCC171. Likewise, the poles of EBSD-detectable intragranular FCC-MC and the corresponding BCC matrix exhibited some degrees of deviations from the ideal positions of K-S and/or N-W OR (Supplementary Figs. 14d-i). The orange and yellow FCC-MC variants in Supplementary Figs. 14a, b had ≥ 3 growth orientations according to morphology, and are mutually rotated within a small angle of ≤ 12° (Supplementary Figs. 14d-f), which corresponds well to the orientational distribution of the 24 K-S variants (Inset of Supplementary Fig. 14a) regarding to both the misorientation (can be an ideal value of 10.53° for crystallographically neighboring variants172) and the pole shape (symmetrically rotating around a reserved center for the ideal Bain OR). Therefore, these orange and yellow neighboring variants can be classified into variants group 1173 and they have distinct misorientations (60 ± 6°) with the blue intragranular variants belonging to variants group 2, to which the GB FCC-MC also belongs (Supplementary Figs. 14d-f). However, these FCC-MC variants might as well followed other ORs other than the K-S OR during precipitation, because if also concerning N-W and Pitsch ORs, the ideal distribution of the poles of the variants would be even more concentrated around the Bain centers and is thus more flexible to account for variants with small mutual misorientations168.

All the above observations demonstrate the complexity and uncertainty of the crystallographic relations between FCC-MC and BCC matrix. This was already realized in MC precipitation-strengthened ferritic steels174,175, but seldom in the refractory community, where FCC-MC carbides grow from/with the refractory BCC matrix in precipitation or eutectic processes. Pole figures containing (near-)coincident poles (Supplementary Figs. 14d-i)80-83 or SAED/FFT patterns containg near-paralleled diffraction spots74-79,176 would easily lead to conclusions of (near-)K-S or (near-)N-W ORs.

In this study, two intragranular FCC-MC variants were firstly observed to be under strictly paralleled zone axes of [111]BCC // [101]FCCv1 // [110]FCCv2 (Extended Data Fig. 7d). Then, it was found that variant 1 had two diffraction spots with some degrees of deviations from the neighboring BCC spots, and another diffraction spot at the identical position (< 2°) with the corresponding BCC spot (Extended Data Fig. 7c); whereas variant 2 had two diffraction spots slightly deviating from the neighboring BCC spots but along different directions from variant 1, and another diffraction spot that strictly overlapped with a BCC spot, but a different one from variant 1 (Extended Data Fig. 7c). The FCC-MC spots which always deviated from BCC densely-packed plane {110}BCC spots were revealed to be {111}FCC densely-packed plane spots, while spots overlapping with {110}BCC were {100}FCC, as (01)BCC // (020)FCCv1 and (10)BCC // (002)FCCv2 (Extended Data Fig. 7d). Therefore, these two FCC-MC variants actually followed the Pitsch ORs with the BCC matrix, and it was consistent with the simulated diffraction pattern (Extended Data Fig. 7e1). The interplanar spacings of the BCC and MC planes with ORs had such close values that the actual contacting interfaces were coherent ones without any interfacial misfit dislocations within 50 atomic planes (Extended Data Figs. 7e2, e3), indicating a small lattice misfit ≤ 2% with elastic coherent strain fields (Extended Data Fig. 7e4).

During the ending stage of non-equilibrium solidification, FCC-MC precipitated from the solute-saturated BCC regions (Supplementary Fig. 13b) such as GBs and interdendritic regions (Supplementary Figs. 12a-c, j-l). During the subsequent *in-situ* homogenization, FCC-MC increased in volume fraction (Extended Data Fig. 4b) and simultaneously altered in distribution and morphology (Supplementary Figs. 12a-i). Columnar dendrites gradually turned spherical (Supplementary Figs. 12a, d) as the diffusion of atoms and migration of microstructures towards lower-energy configurations proceeded, but with some long, continuous FCC-MC preserved from Supplementary Fig. 12b to Supplementary Fig. 12e. The process finally transformed the dendritic arms into the interior of subgrains, and the interdendritic regions into the SGBs (Supplementary Figs. 12a-h). The SGBs inheriting the long, continuous FCC-MC would be consistent with Supplementary Fig. 2c31 in SEM and Extended Data Fig. 7g in TEM, while the SGBs without the long, continuous FCC-MC would be consistent with Supplementary Fig. 12i in SEM and Extended Data Figs. 7h, i in TEM. During *in-situ* homogenization, FCC-MC did not have significant changes in width (50~100 nm) but had obvious reductions in length (Supplementary Figs. 12c, f, i), indicating the occurrence of a fragmentation mechanism which could be caused by thermal grooves177 or stresses from the incompatibility of thermal expansion/contraction rates between the matrix and FCC-MC178. However, upon the formation of SGBs, high-density dislocations were generated to accommodate for the trivial misorientations between two subgrains originating from two dendritic arms (Extended Data Fig. 7h). The elastic field around large Hf atoms in the RCCA matrix would then interact with the elastic field of dislocations and promote a stress induced diffusion of Hf atoms to the dislocations179 (EDS in Extended Data Fig. 7h). The unprecipitated residual C atoms in the matrix also preferred to segregate to dislocaions through a classical Cottrell mechanism to reduce the elastic energy of the dislocations180. Therefore, the co-segregation of Hf and C enhanced the driving force for new FCC-MC precipitation at SGB dislocaions, which is already an inherently favourable heterogeneous nucleation process to reduce energy. Owing to the high driving force, FCC-MC had high nucleation rates and thus fine sizes (~20 nm, Extended Data Fig. 7i) due to solute competition. The formation of the SGB networks decorated with refined FCC-MC carbides was revealed to be especially beneficial for further toughening of the ductilized 0.8C alloy, as demonstrated by EBSD study after deformation in the ***main text***.

**Supplementary Note 11 | Microcrack toughening**

In Figs. 5p-r, at the late plastic stages of 0.8C alloy in RT tension, FCC-MC carbides at SGBs are believed to further delay the onset of fatal propagation of the main crack, achieving the good RT tensile elongation (13.3%) of this alloy.

Carcks/voids were observed at minor positions along GBs (Fig. 5p), which are almost inevitable for particle-filled GBs after high degrees of straining, no matter how compatible they are181. Despite this, high density microcracks at SGBs (Figs. 5p, q) might further boost the ductility of 0.8C alloy. The microcracks were generated by the breakage of FCC-MC at stress concentrated SGBs, or by interfacial decohesion between FCC-MC and the matrix (Fig. 5q) during loading. In unnotched tensile test for the ductile 0.8C RCCA, primary cracks may appear at the late plastic stages and took the form of shear ridge separation and micro-void coalescence182. Although this process have high strain energy release rates unlike in brittle materials, the *in-situ* formation (or controlled expansion) of microcrakcs ahead of the primary crack tips can still absorb energy that is sufficient to help suppress the propagation of the primary cracks183,184. Furthermore, during earlier plastic stages, the formation of microcracks released local stress concentrations185 around SGBs (Fig. 5o and the inset of Fig. 5c) and intragranular carbide clusters to prevent catastrophic cracking. The formed microcracks were then buffered by the surrounding ductile matrix186 through frequent slip activities and dislocation emission (Fig. 5q), thus continuously leveraging the formation of microcracks without growing into fatal cracks. Under a tilted SEM direction, wavy slip traces formed by pencil glide or cross-slips with intense slip localization (evidenced by the facet height88) also generated microcracks (Fig. 5r), releasing the stress concentrations and delaying the advent of cleaving.


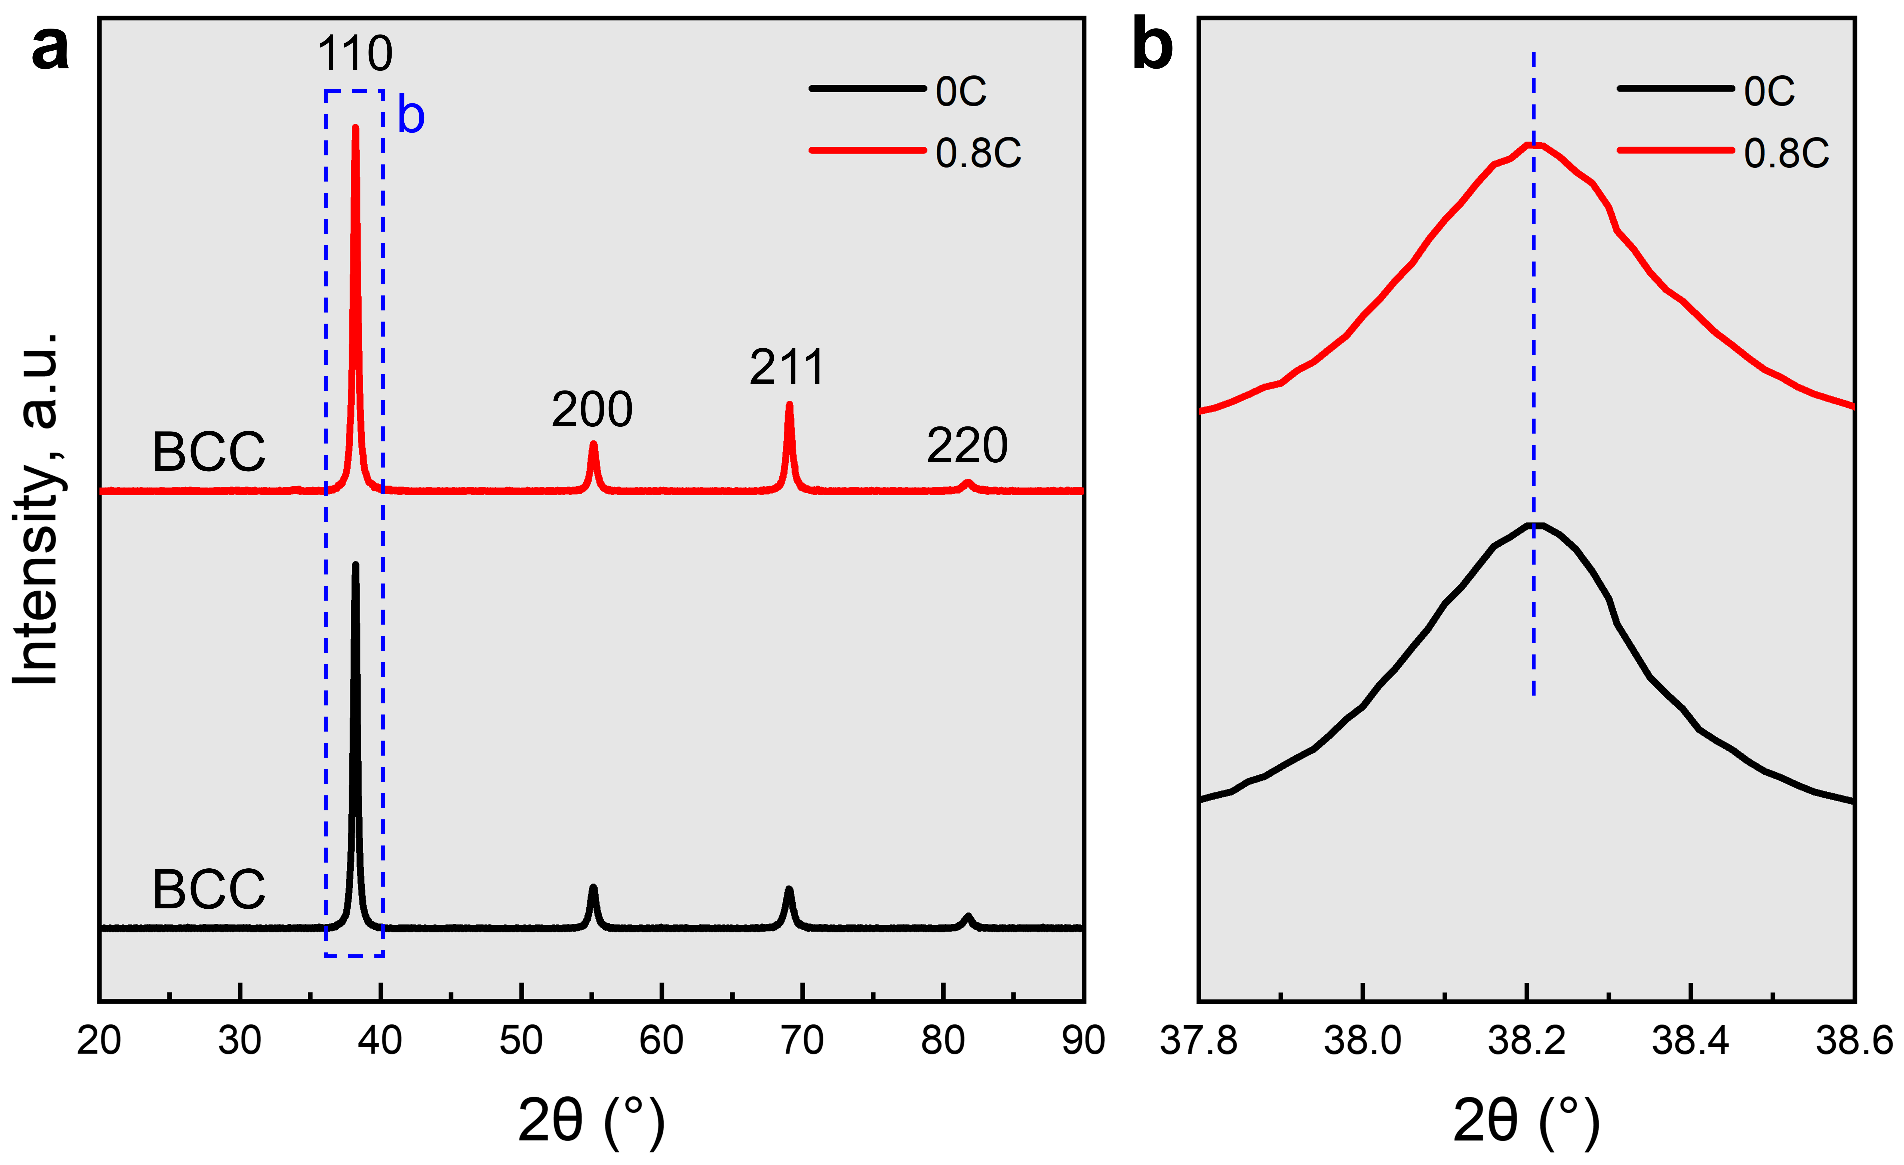


**Supplementary Fig. 1 | XRD results of as-cast 0C and 0.8C RCCAs.**

**Notes:** In **b**, the identical 2*θ* position of the {110}BCC peaks for 0C and 0.8C alloys might be attributed to a possible cancellation effect between the depletion of large-size Hf atoms in the BCC solid solution (due to carbide formation) and the increasing interstitial C concentration. However, this lies beyond the main scope of the present study.


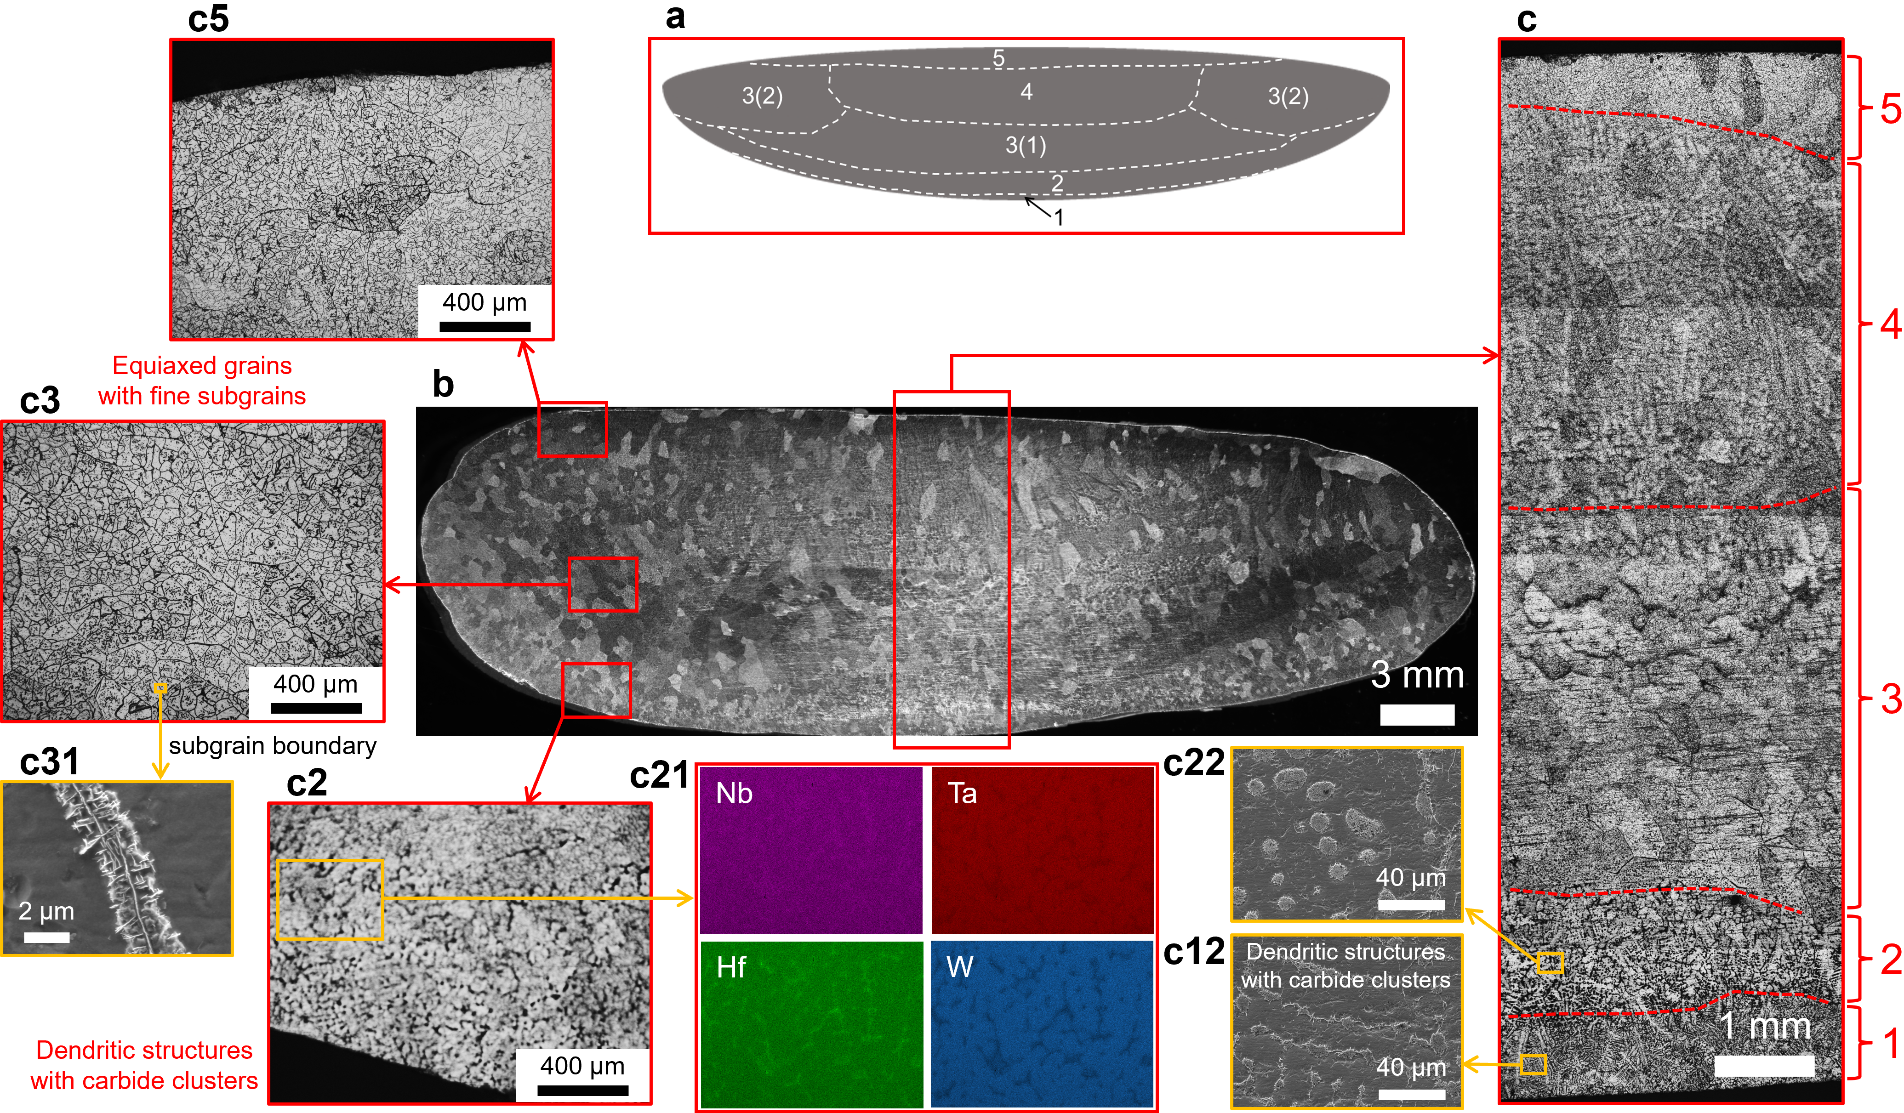


**Supplementary Fig. 2 | Distribution of different microstructures across the whole as-cast ingot of 0.8C RCCA.** The description and interpretation of this figure can be found in Supplementary Note 2.


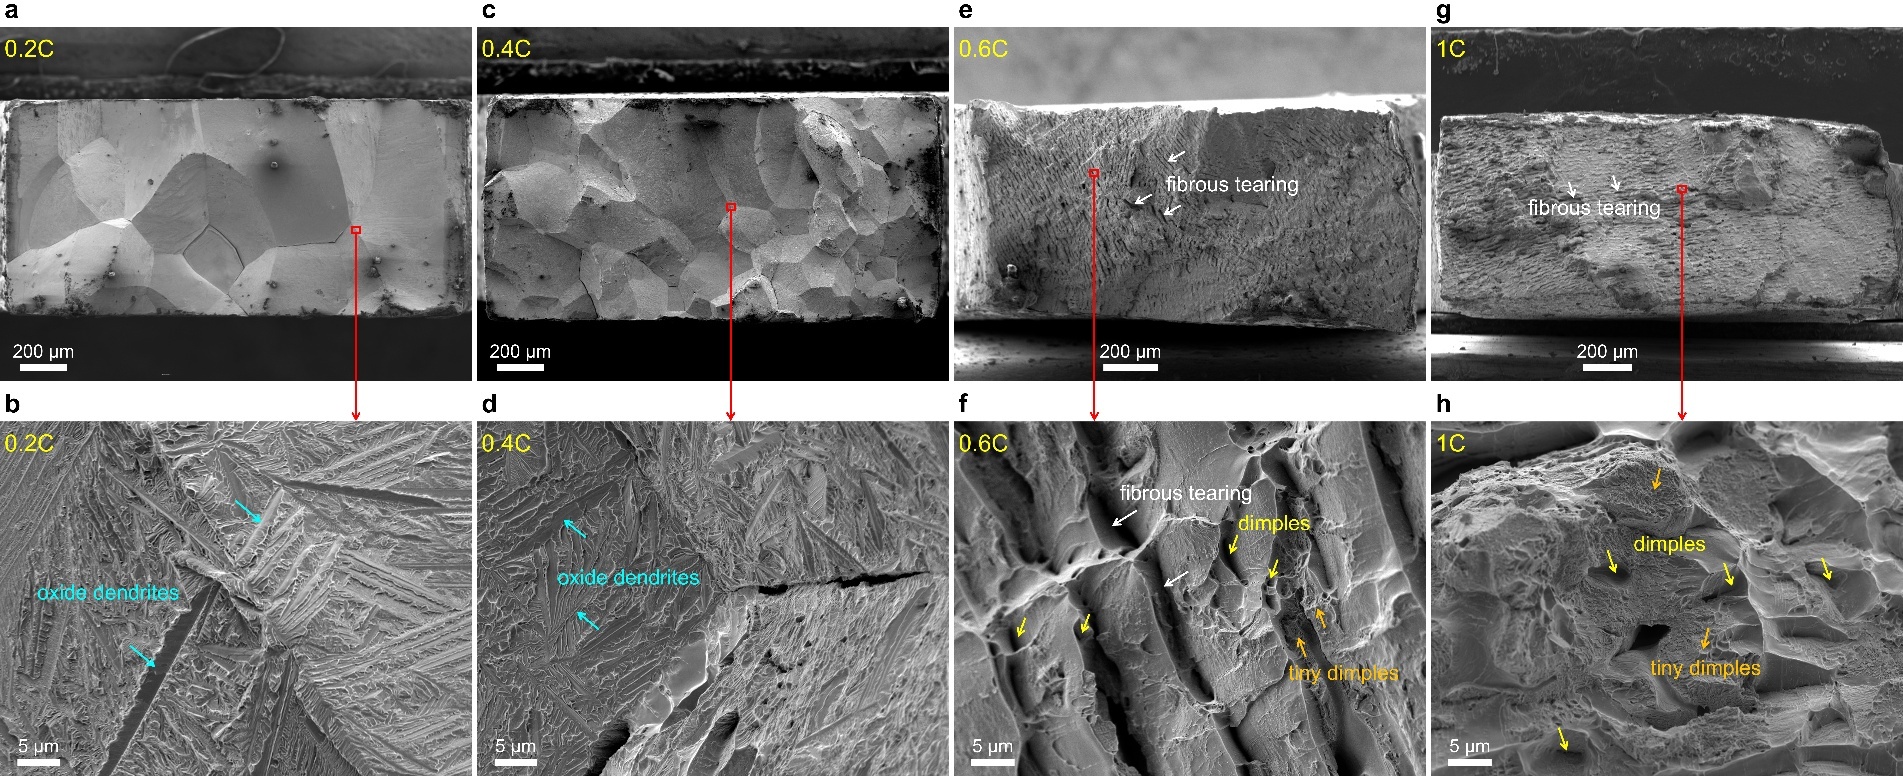


**Supplementary Fig. 3 | Room temperature tensile fractography of:** **a, b**, 0.2C alloy; **c, d**, 0.4C alloy; **e, f**, 0.6C alloy; **g, h**, 1C alloy.

**Notes:** 0.2C alloy fractured at an even lower macroscopic elastic strain than 0C alloy. This may be attributed to coarser grains of 0.2C alloy (in **a**), which had a lower total grain boundary area and thus higher oxygen concentration (riper oxide growth) at each local point68.


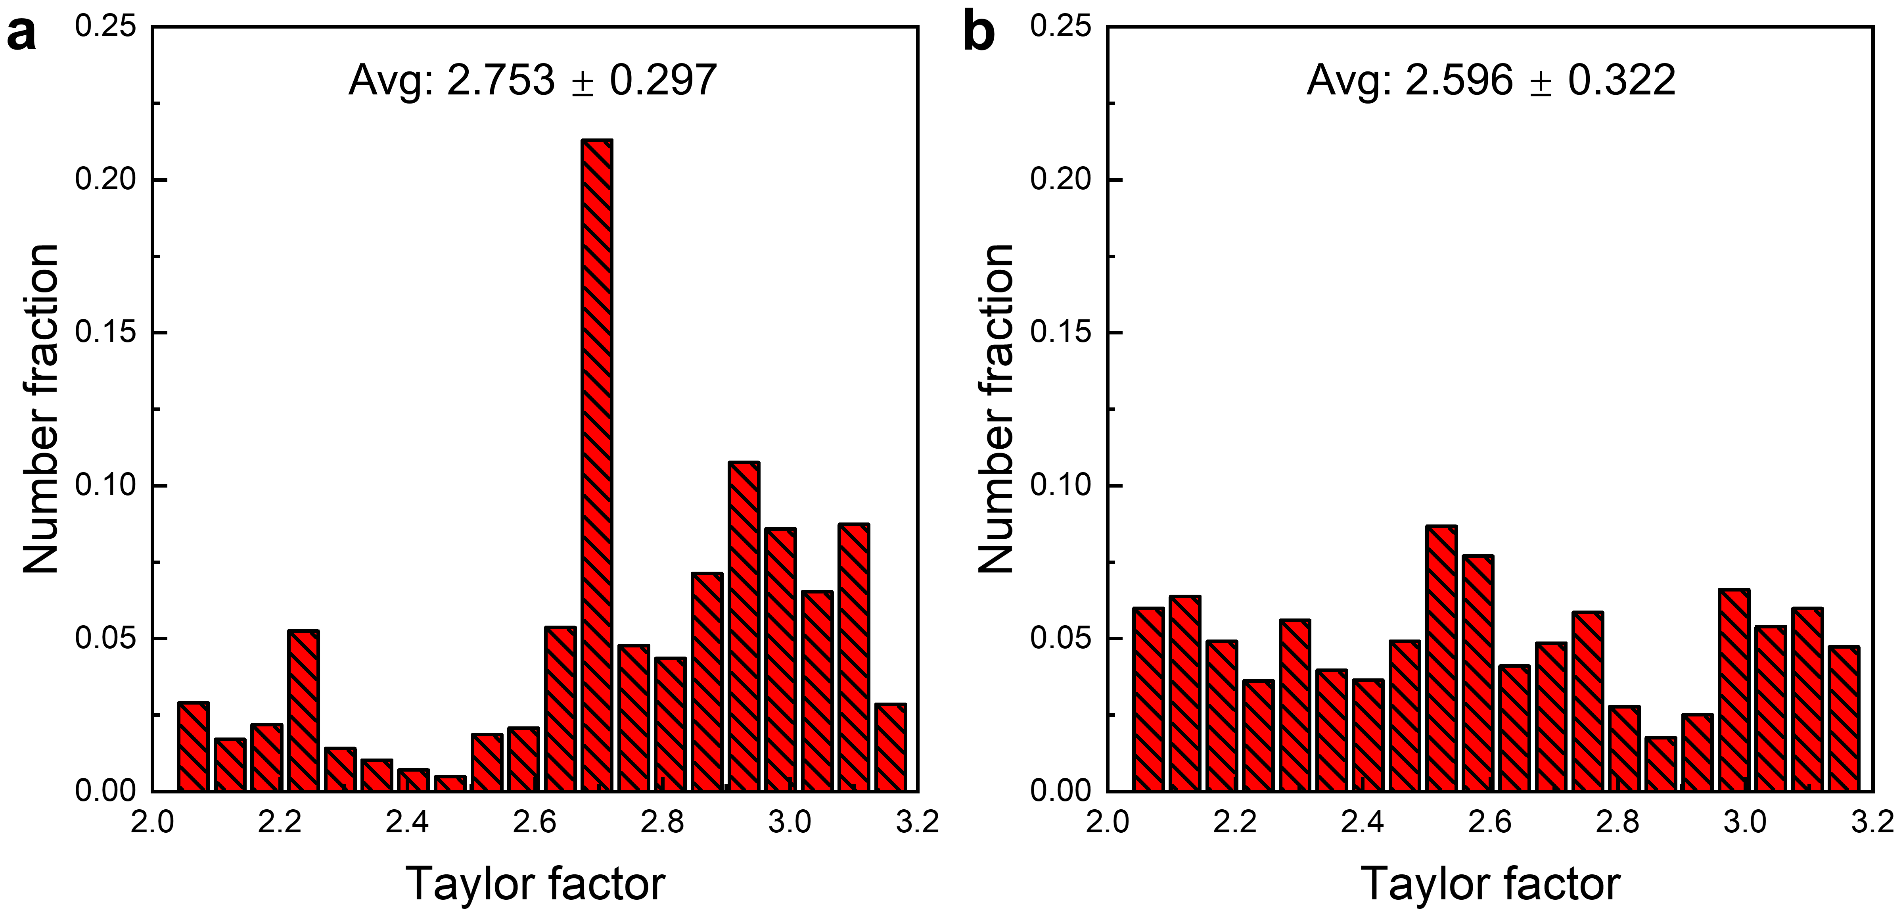


**Supplementary Fig. 4 | Taylor factor distribution of the EBSD studied area of the room temperature tensile samples of:** **a**, 0C alloy; **b**, 0.8C alloy. Corresponding to Extended Data Fig. 2 and Fig. 5, respectively.


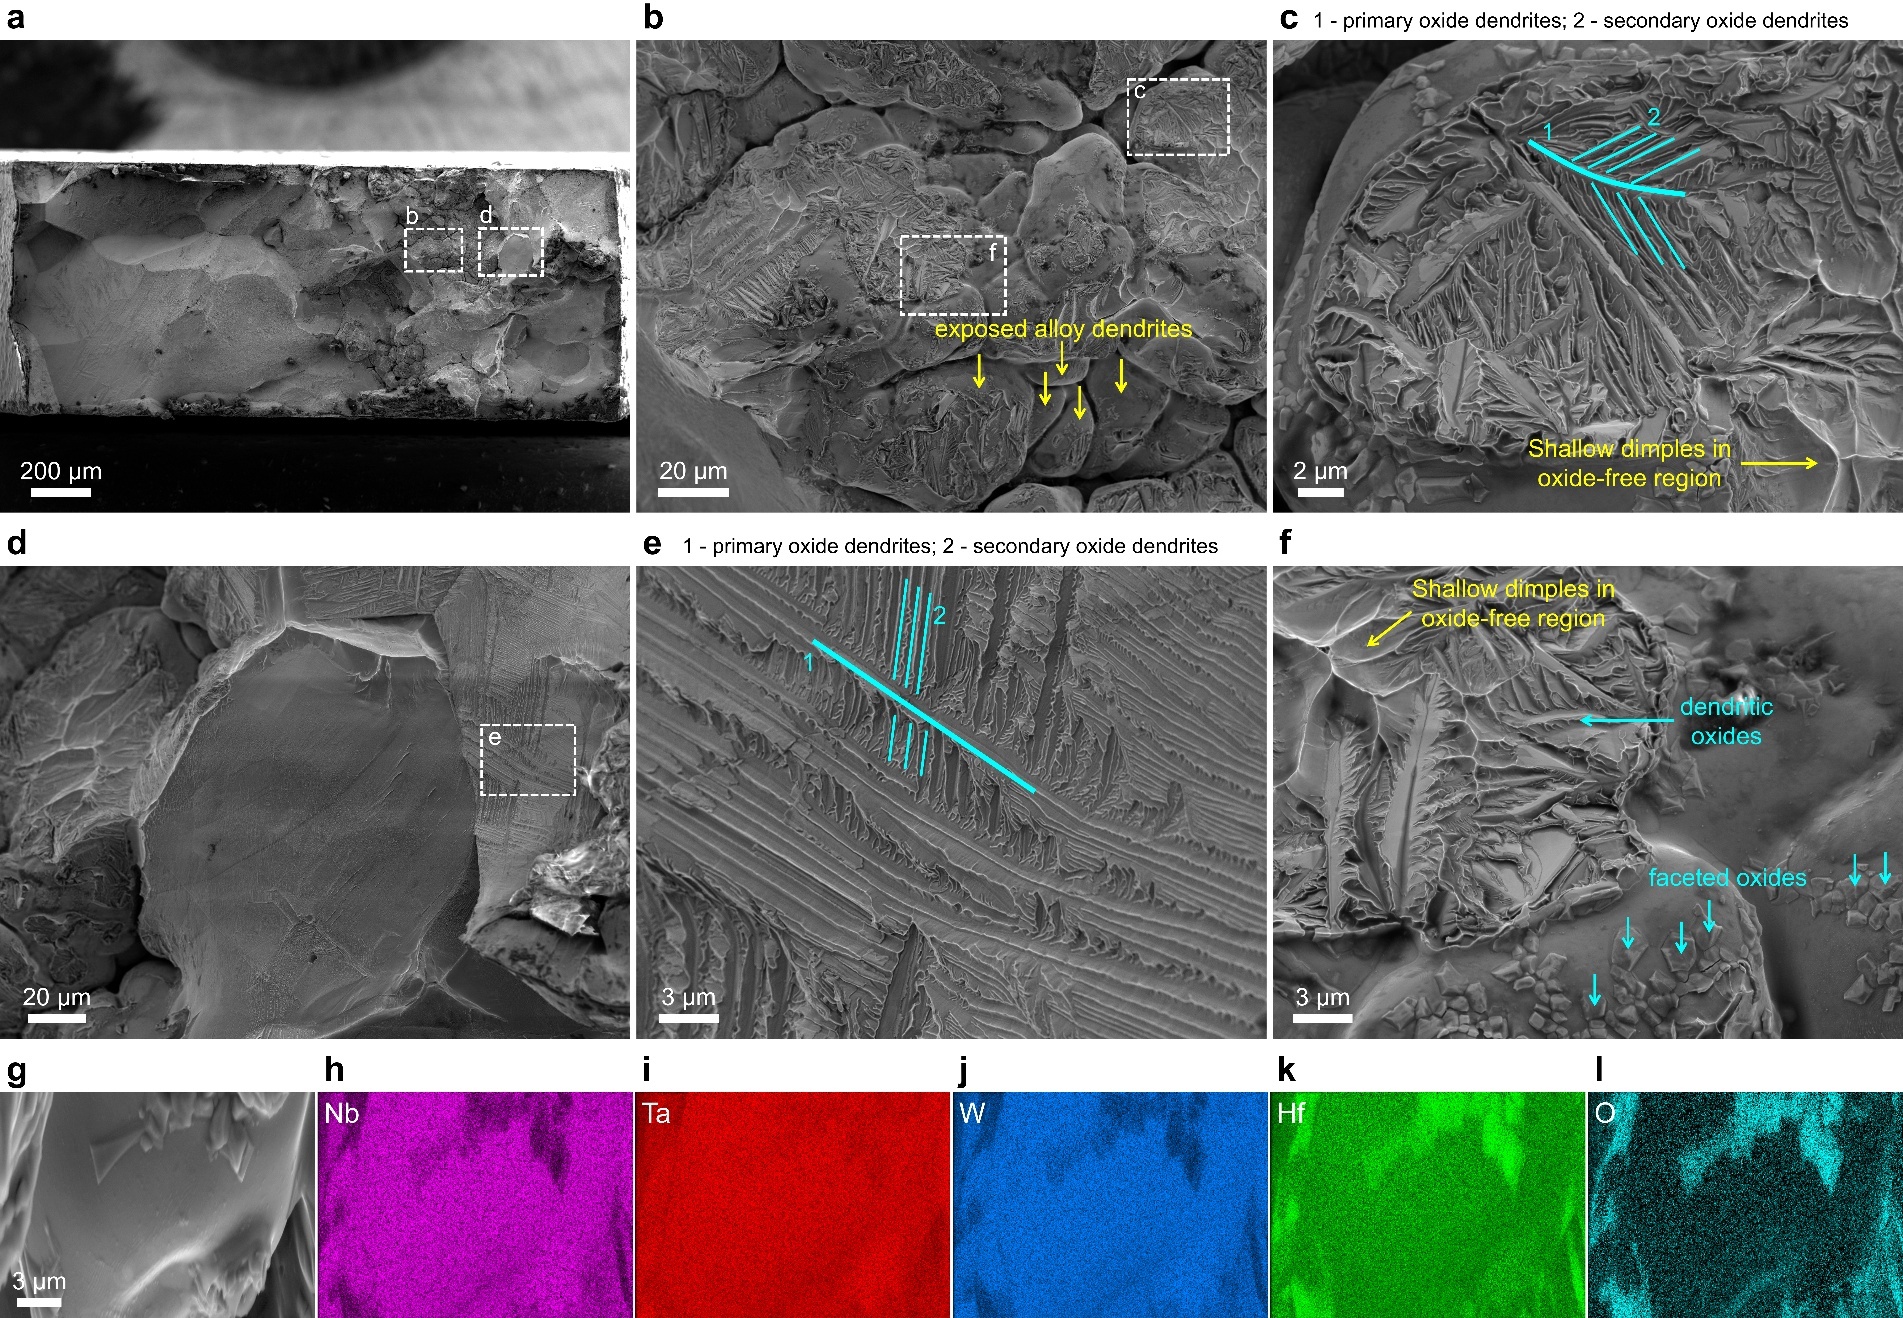


**Supplementary Fig. 5 | Room temperature tensile fractography of another tensile sample of 0C alloy containing regions of casting shrinkage.** **a**, Overall fracture morphology. **b**, The shrinkage region. **c**, Oxide dendrites inside the bridegd (thus fractured after tensile) positions of the premature, exposed, spherical alloy dendrites. **d**, A region of no shrinkage. **e**, Normal dendritic oxide morphology, as consistent with Fig. 2, and also partially spalled. This is to show the comparability of this tensile sample with Fig. 2. **f**, Comparison between dendritic oxides inside the mechanically bridegd positions of the exposed alloy dendrites, and faceted oxides outside of the exposed alloy dendrites. **g-l**, EDS mapping of the faceted particles, proving these are indeed HfO2.


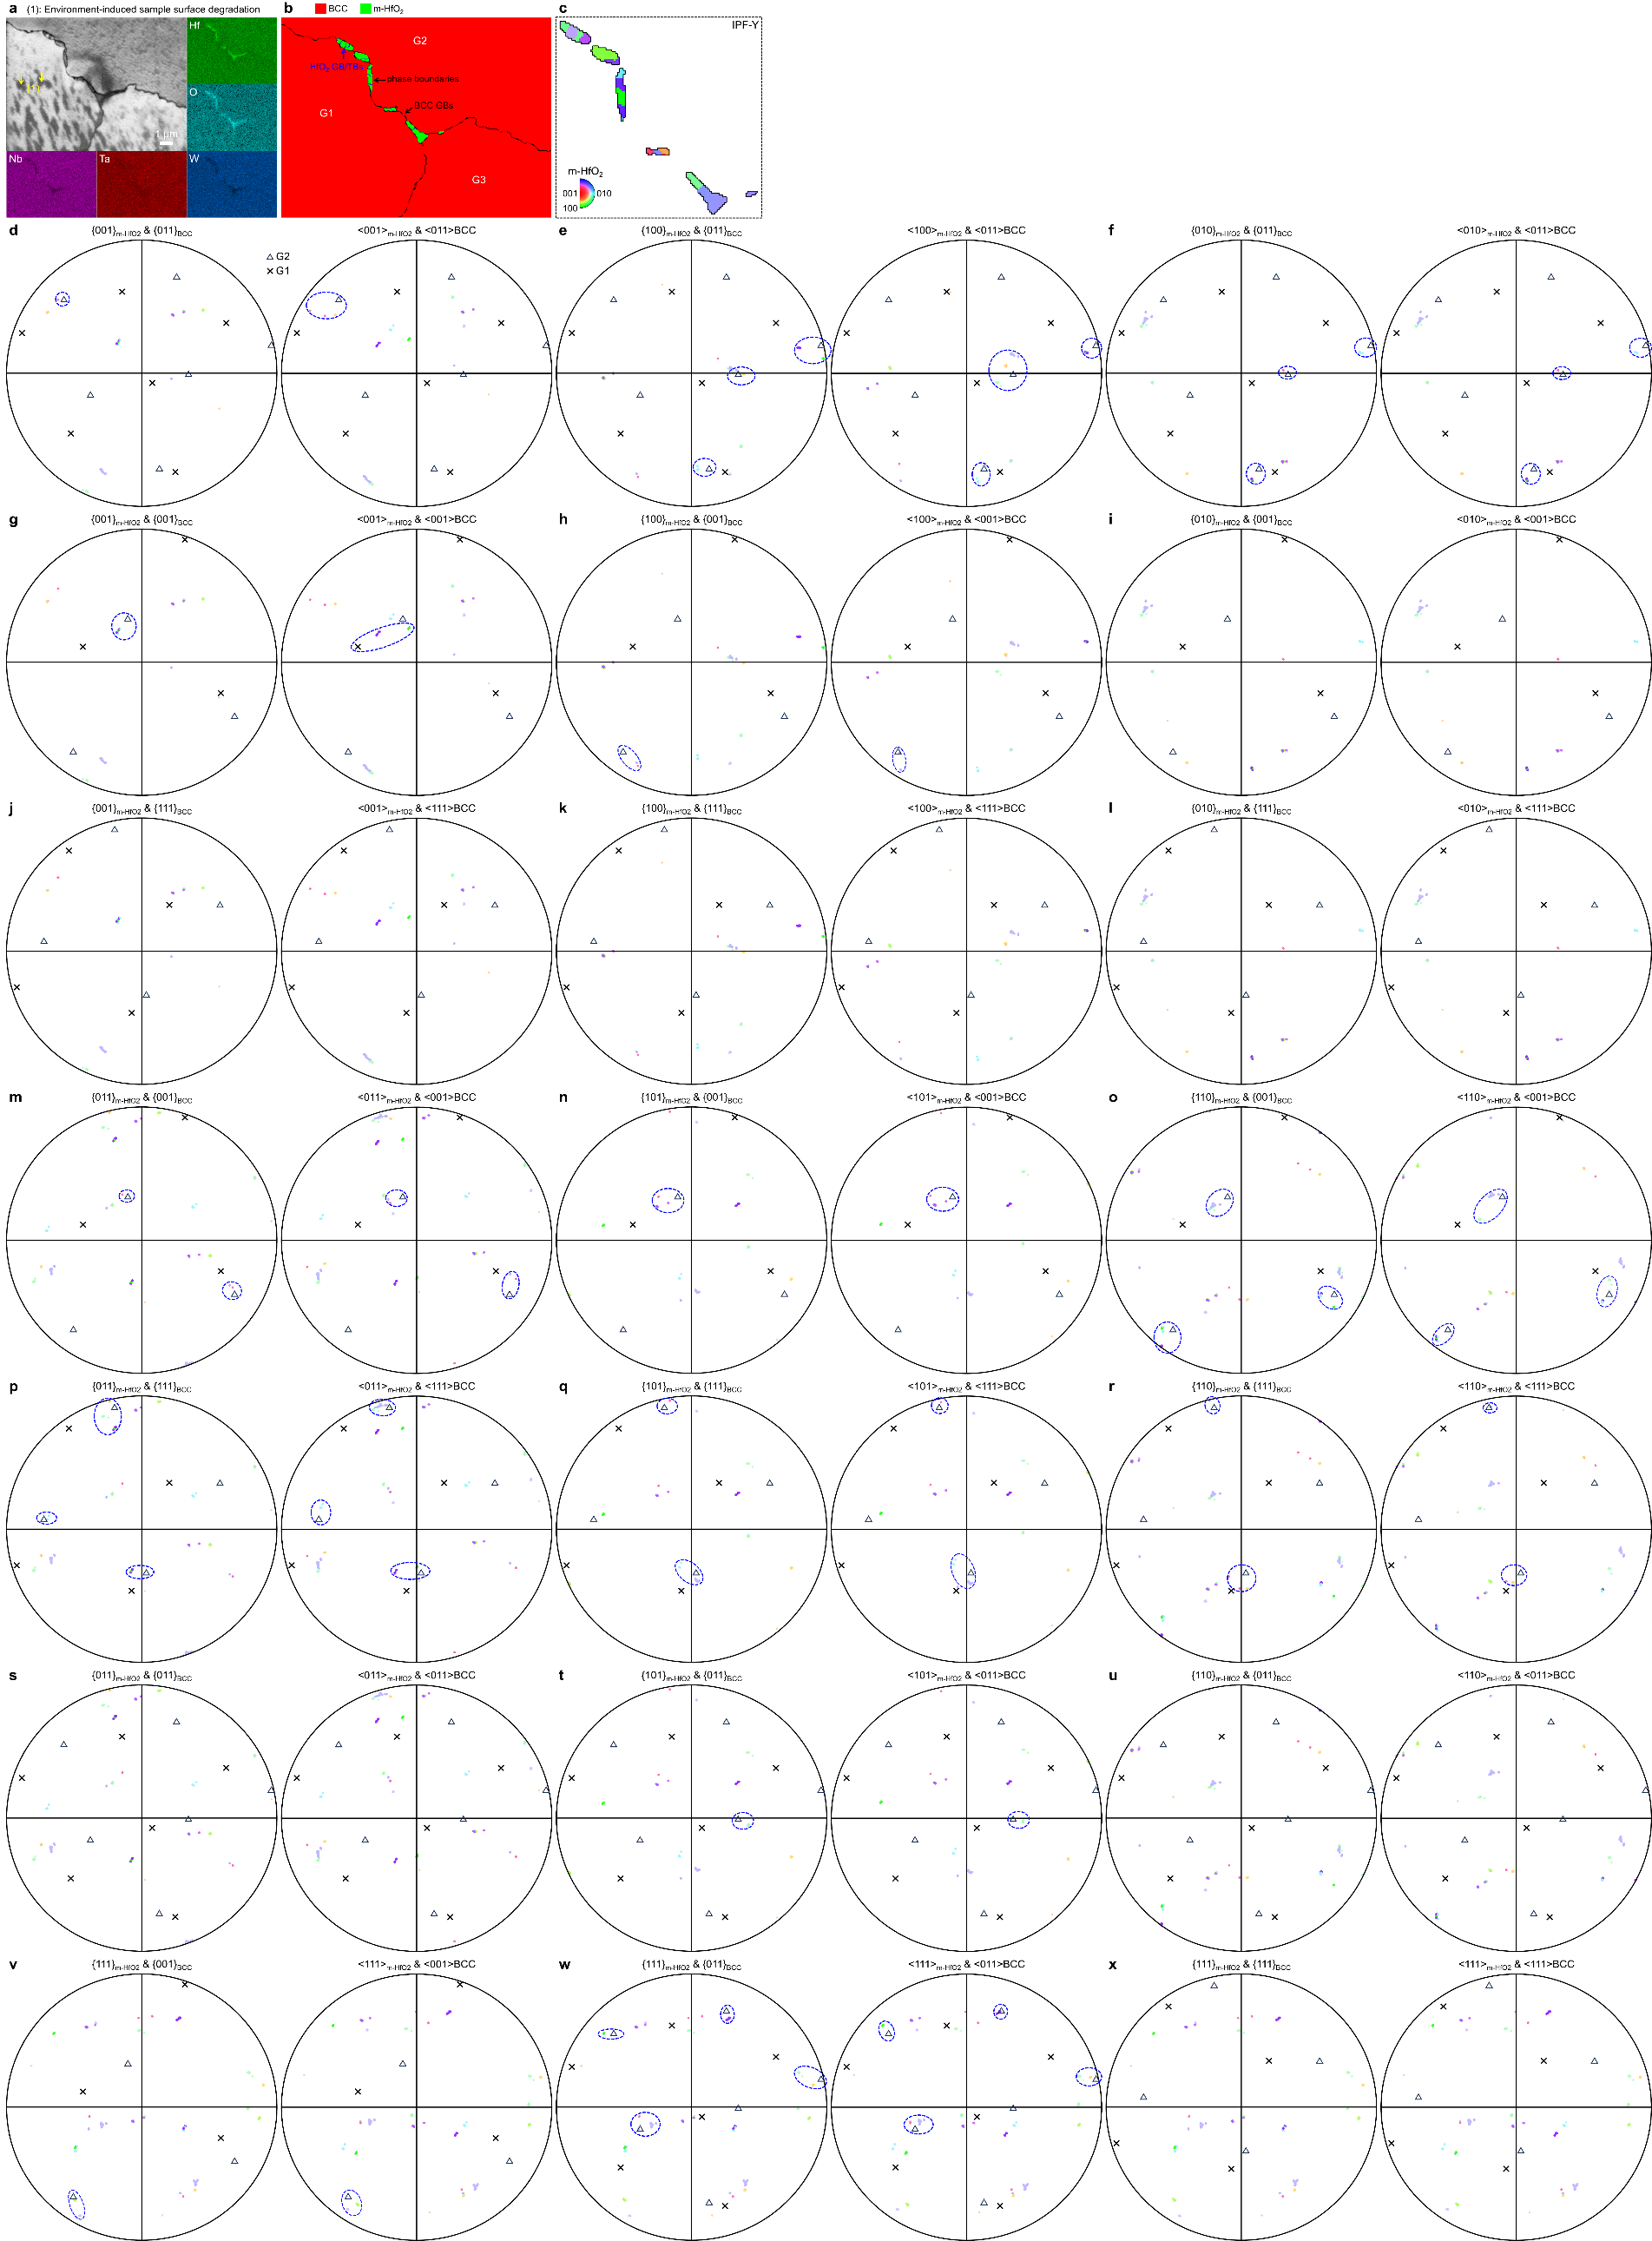


**Supplementary Fig. 6 |** **a**, BC and EDS; **b**, phase; **c**, IPF-Y maps of another studied GB region in 0C alloy. **d-x**, All pole figures of m-HfO2 superimposed by BCC (both within maximum Miller index of 1). Colors of the HfO2 poles are taken from IPF-Y map. (Near) orientation relationships are marked in blue for G2-HfO2.


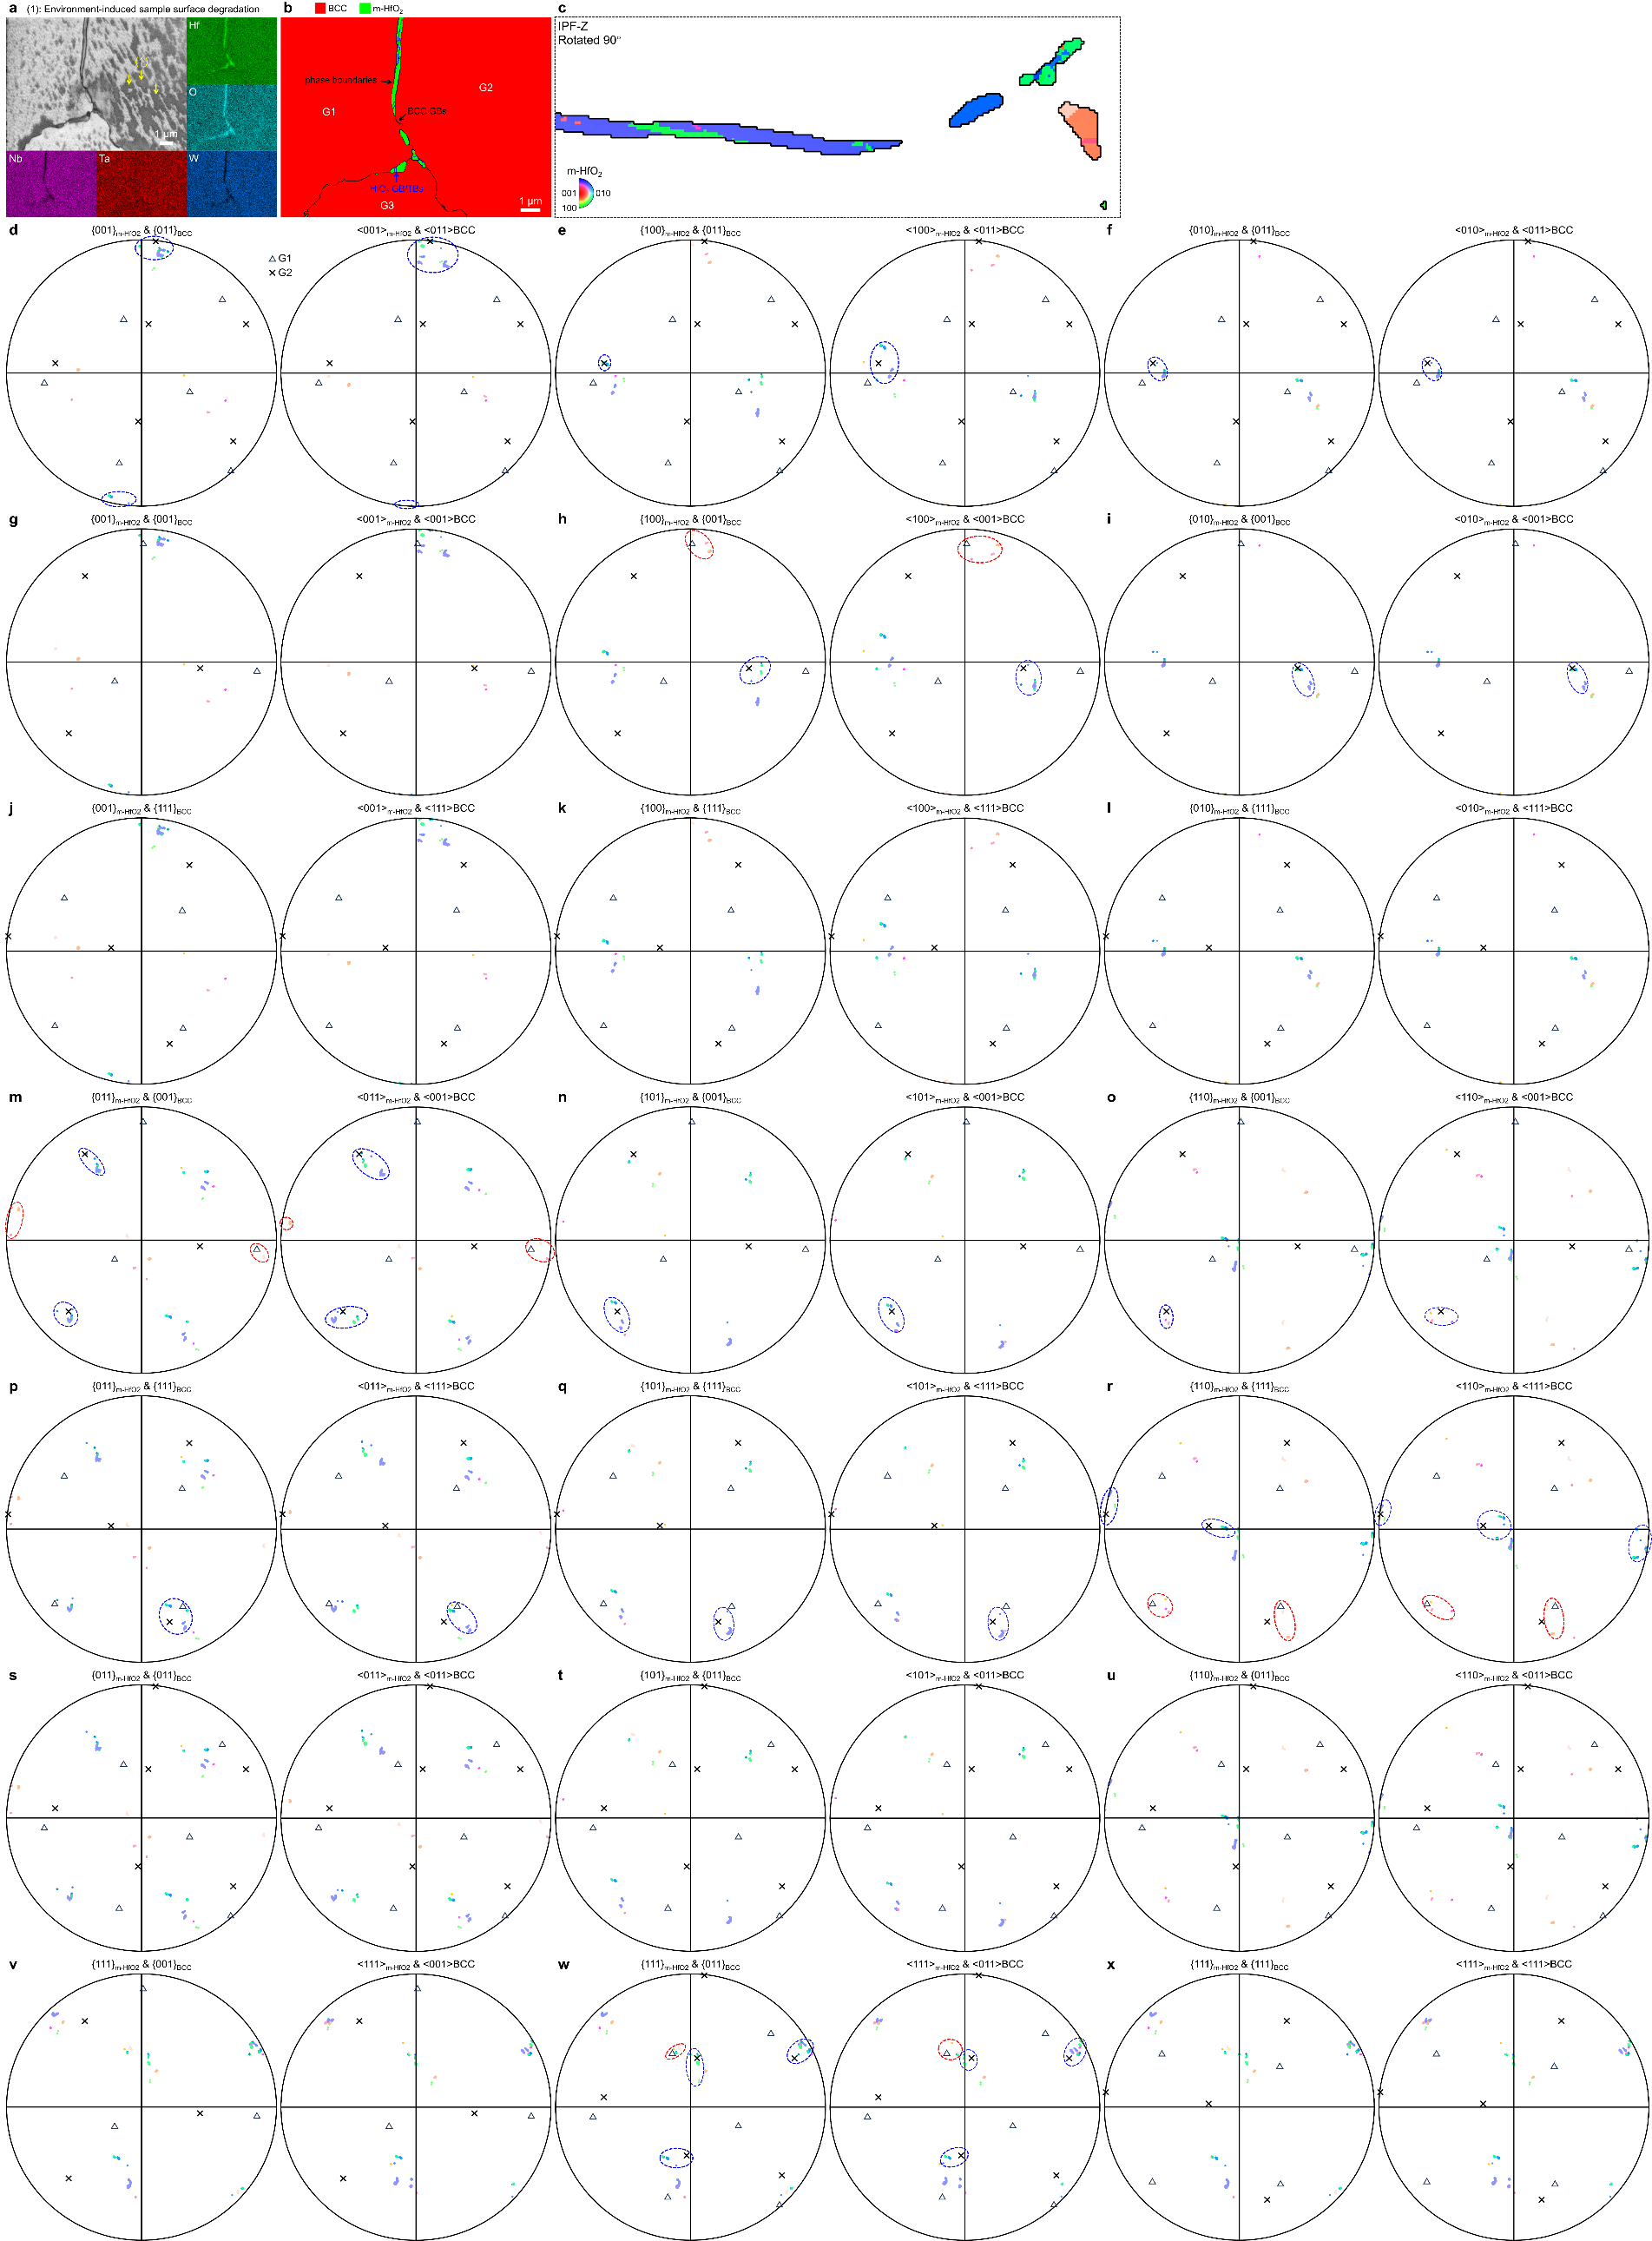


**Supplementary Fig. 7 |** **a**, BC and EDS; **b**, phase; **c**, IPF-Z maps (rotated 90° visually, not crystallographically) of a third studied GB region in 0C alloy. **d-x**, All pole figures of m-HfO2 superimposed by BCC (both within maximum Miller index of 1). Colors of the HfO2 poles are taken from IPF-Z map. (Near) orientation relationships are marked in blue for G2-HfO2, and marked in red for G1-HfO2.


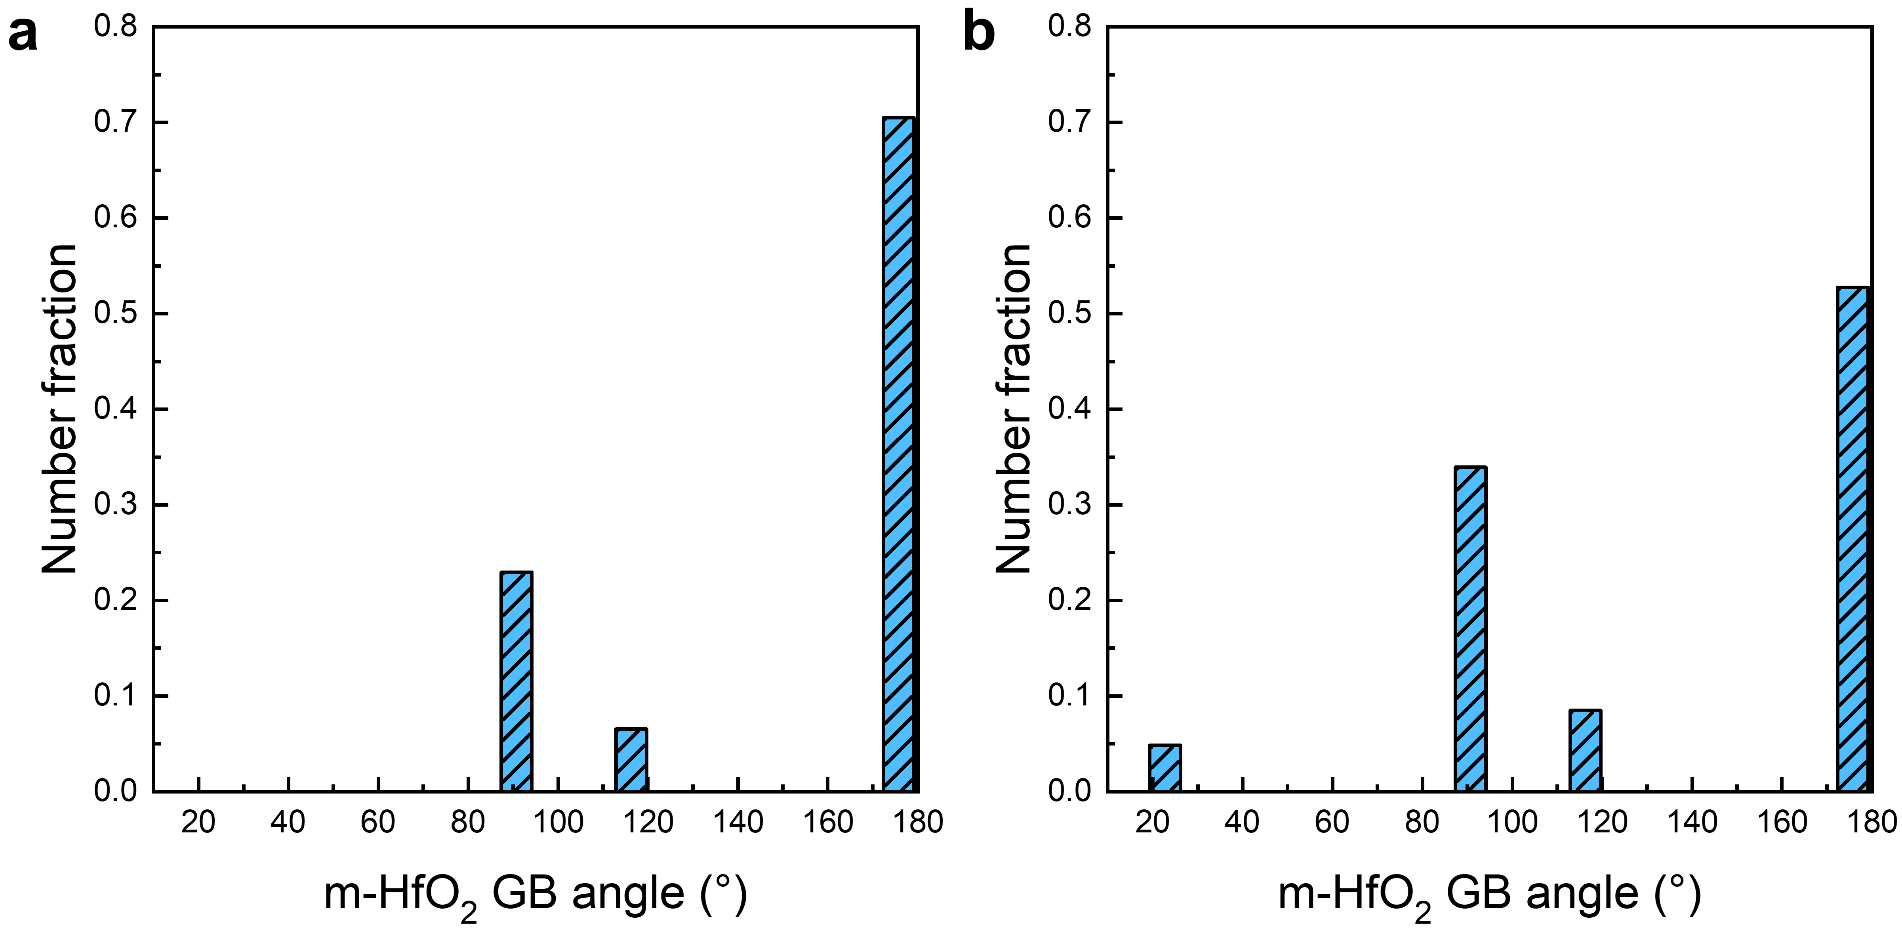


**Supplementary Fig. 8 | Distribution of grain boundary angles inside m-HfO2 phase regions.** **a, b**, Maps corresponding with Supplementary Fig. 6 and Supplementary Fig. 7, respectively.


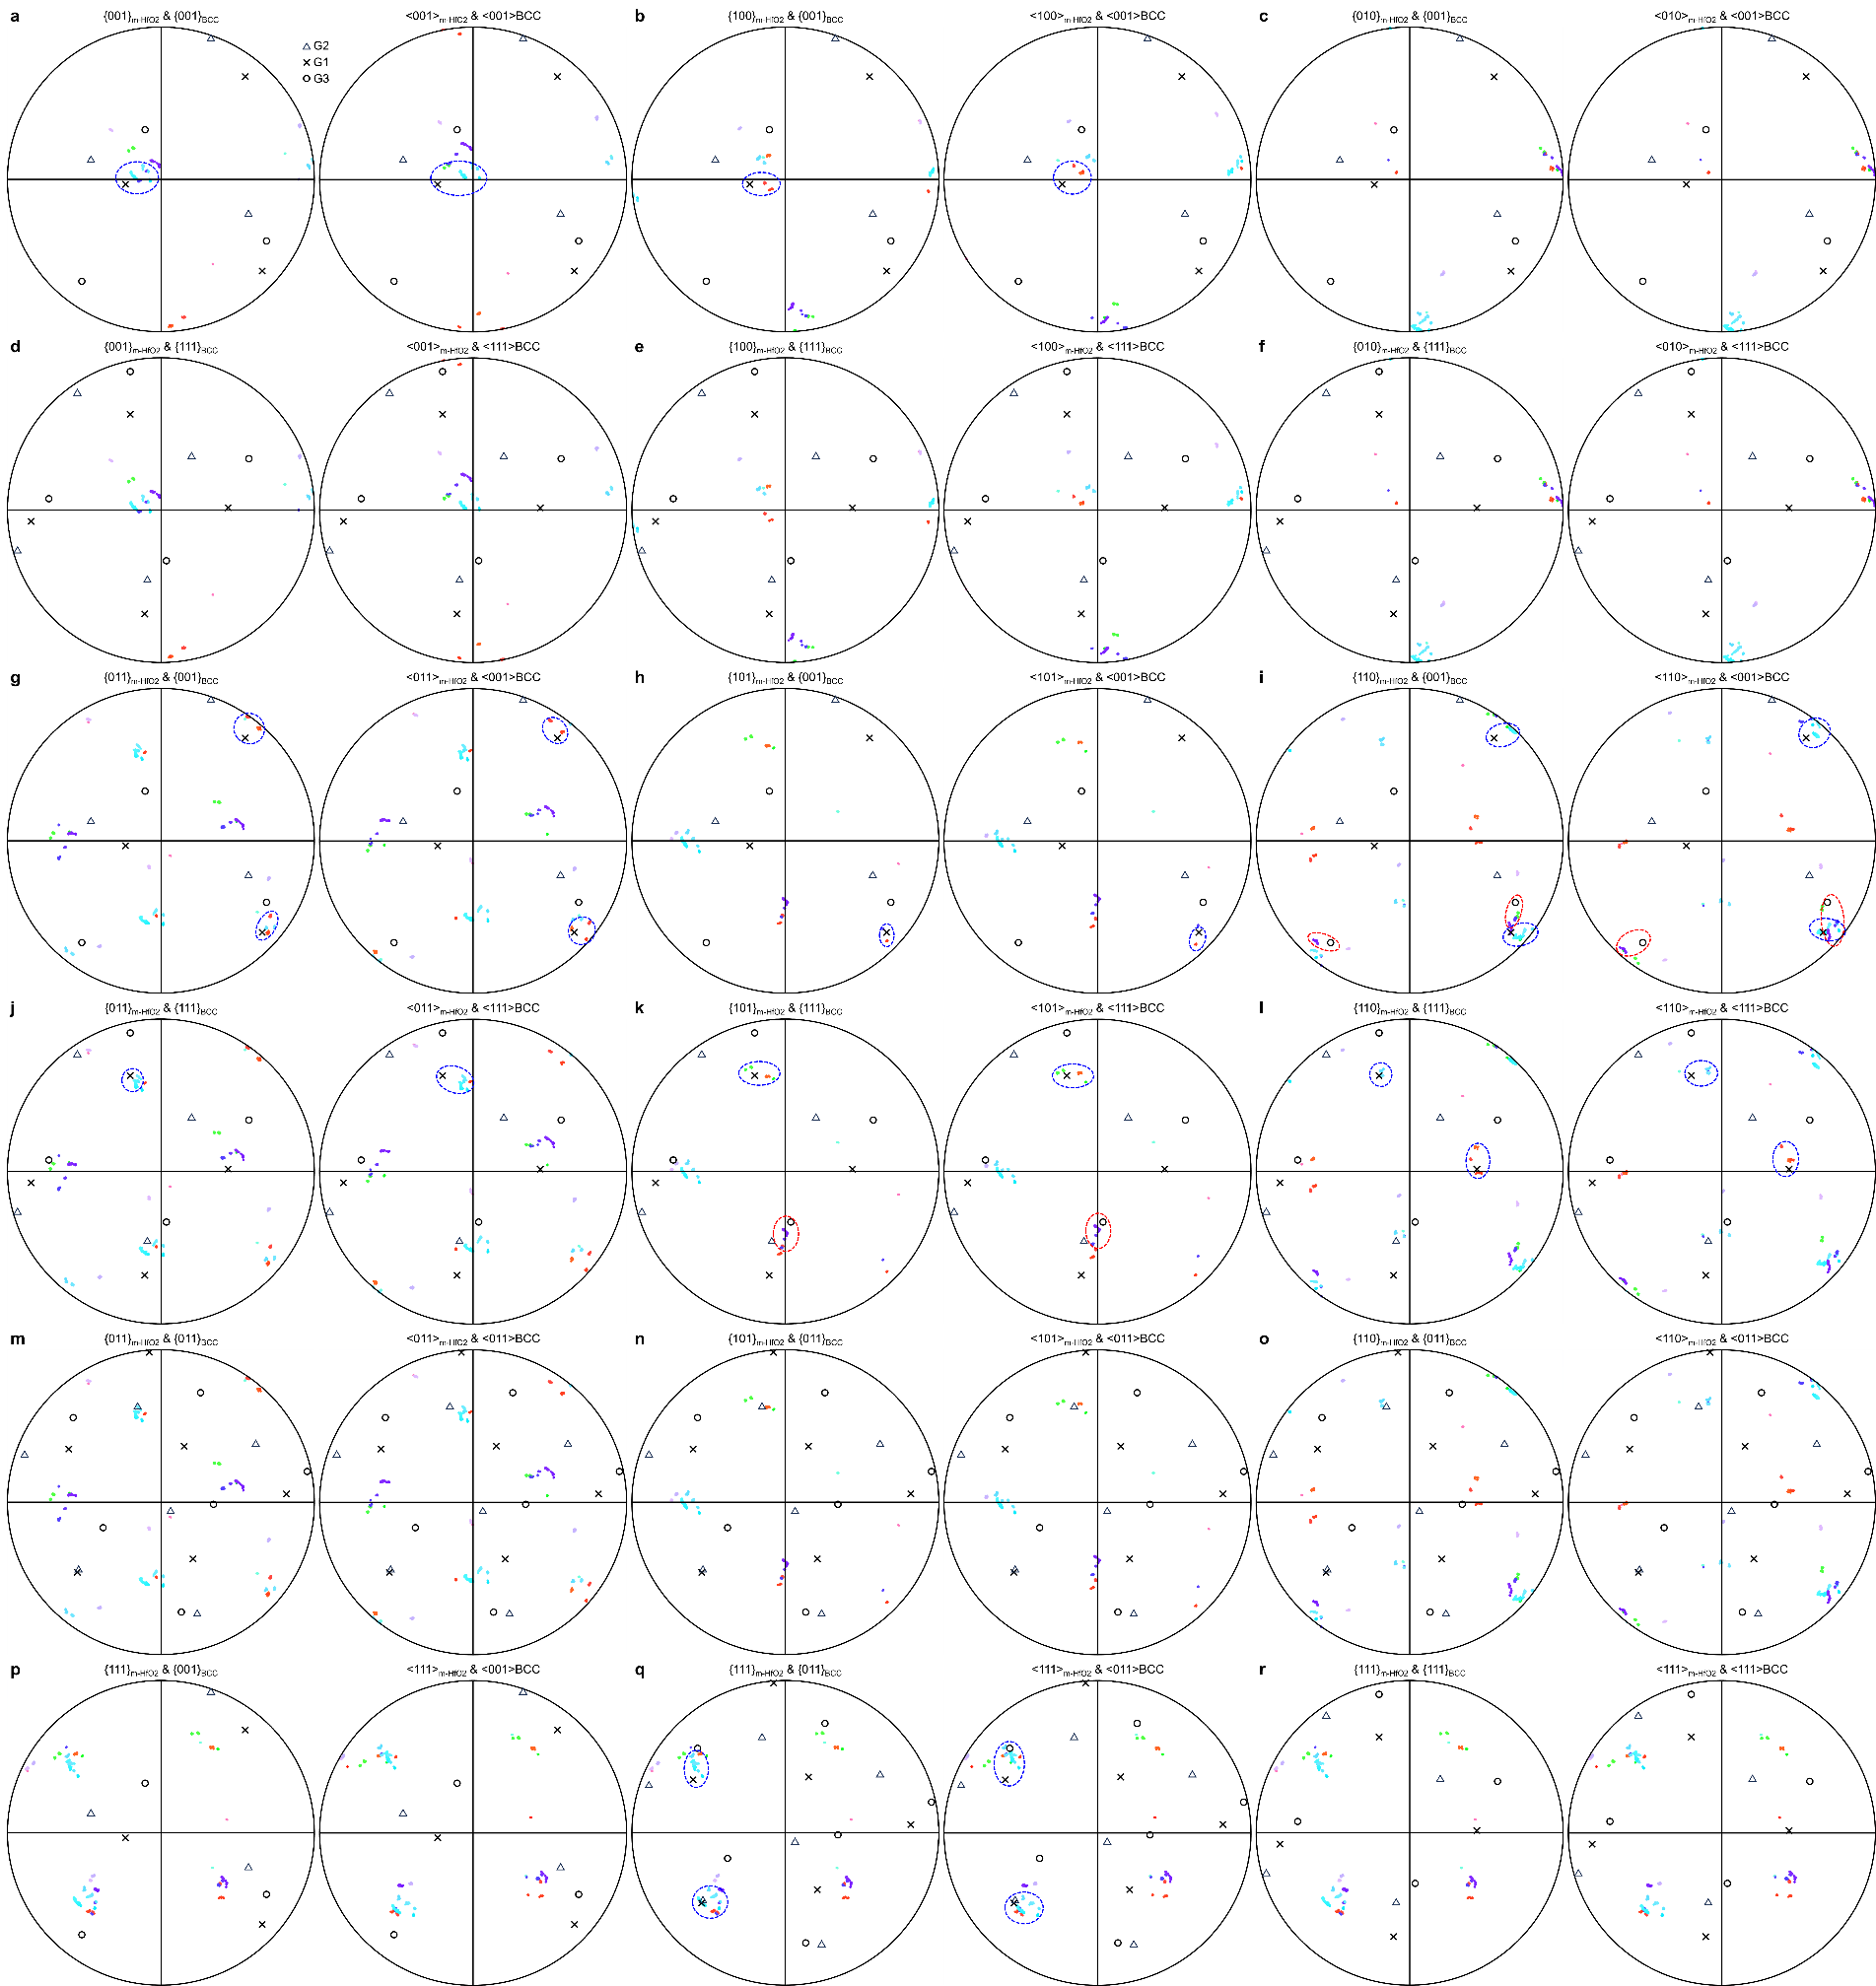


**Supplementary Fig. 9 | All other pole figures** of BCC superimposing on m-HfO2 than the existing pole figures in Fig. 3 (but both within maximum Miller index of 1). Colors of the HfO2 poles are taken from the IPF-X map in Fig. 3c. (Near) orientation relationships are marked in blue for G1-HfO2, and marked in red for G3-HfO2.


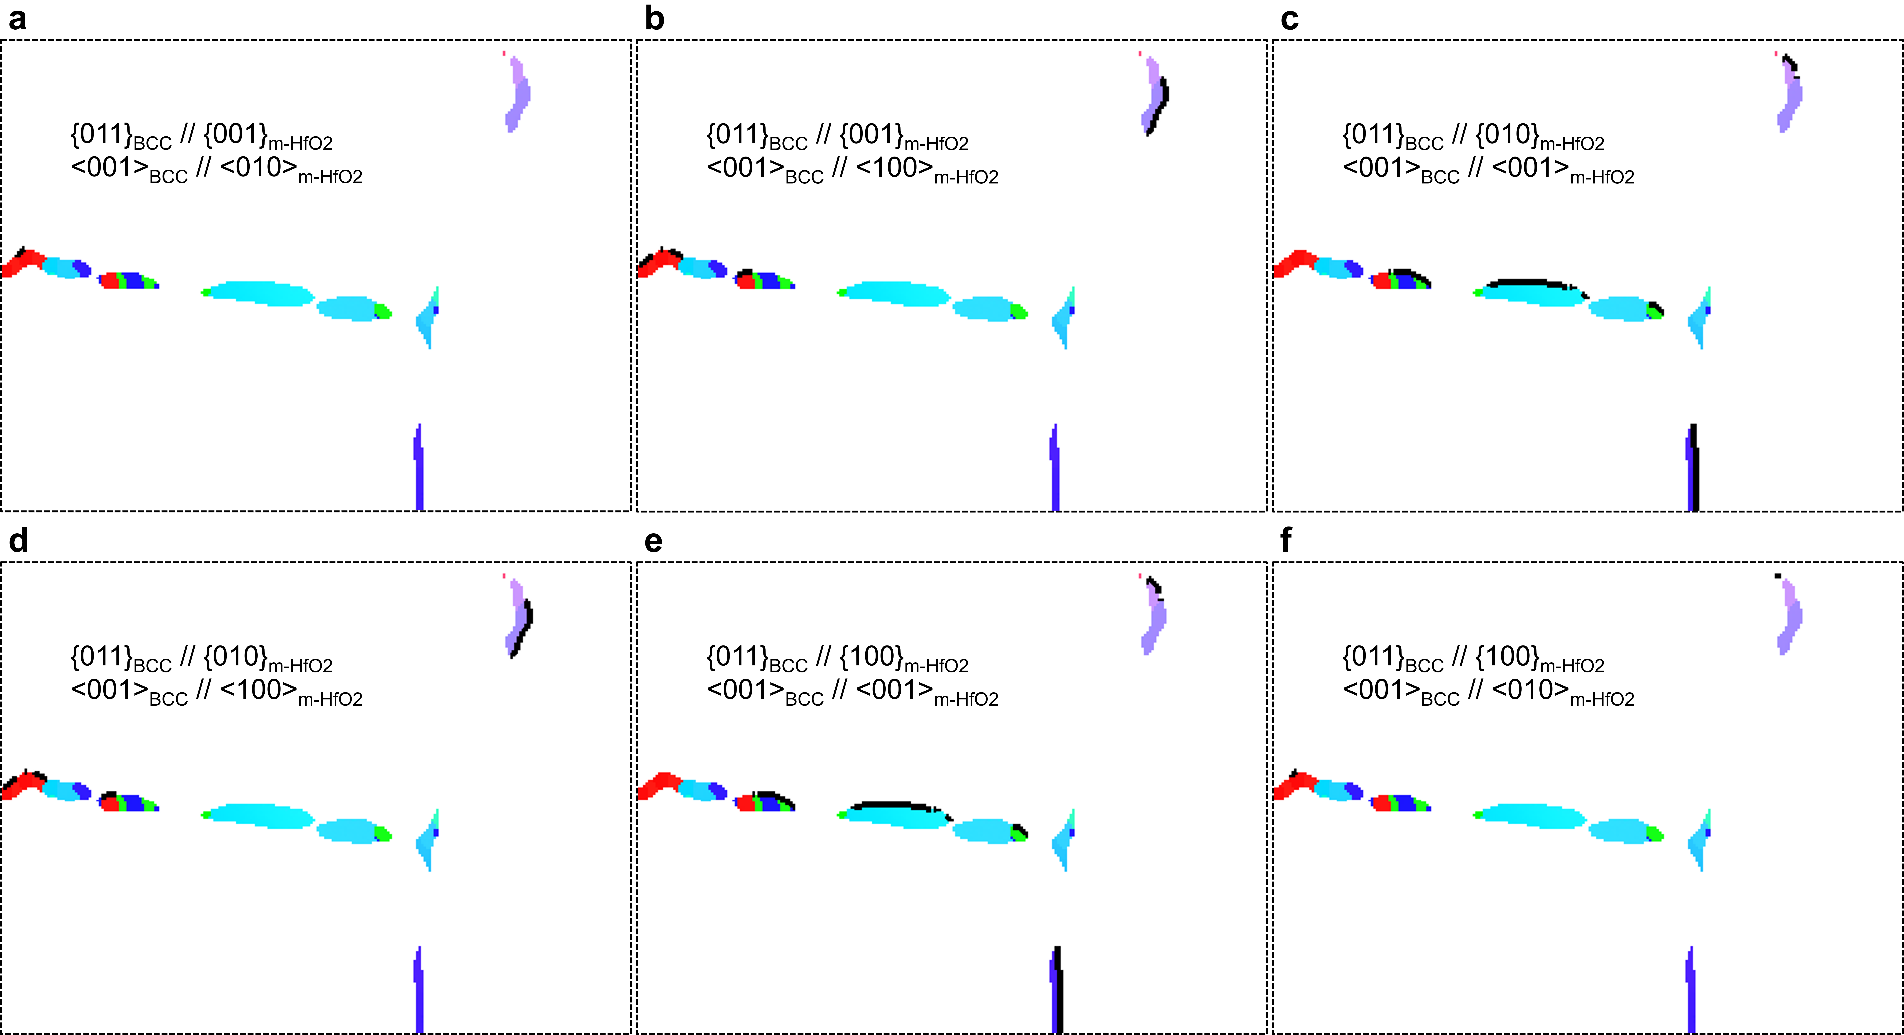


**Supplementary Fig. 10 | Phase boundaries with specific orientation relationships delineated in black.** Corresponding to the IPF-X map in Fig. 3c.


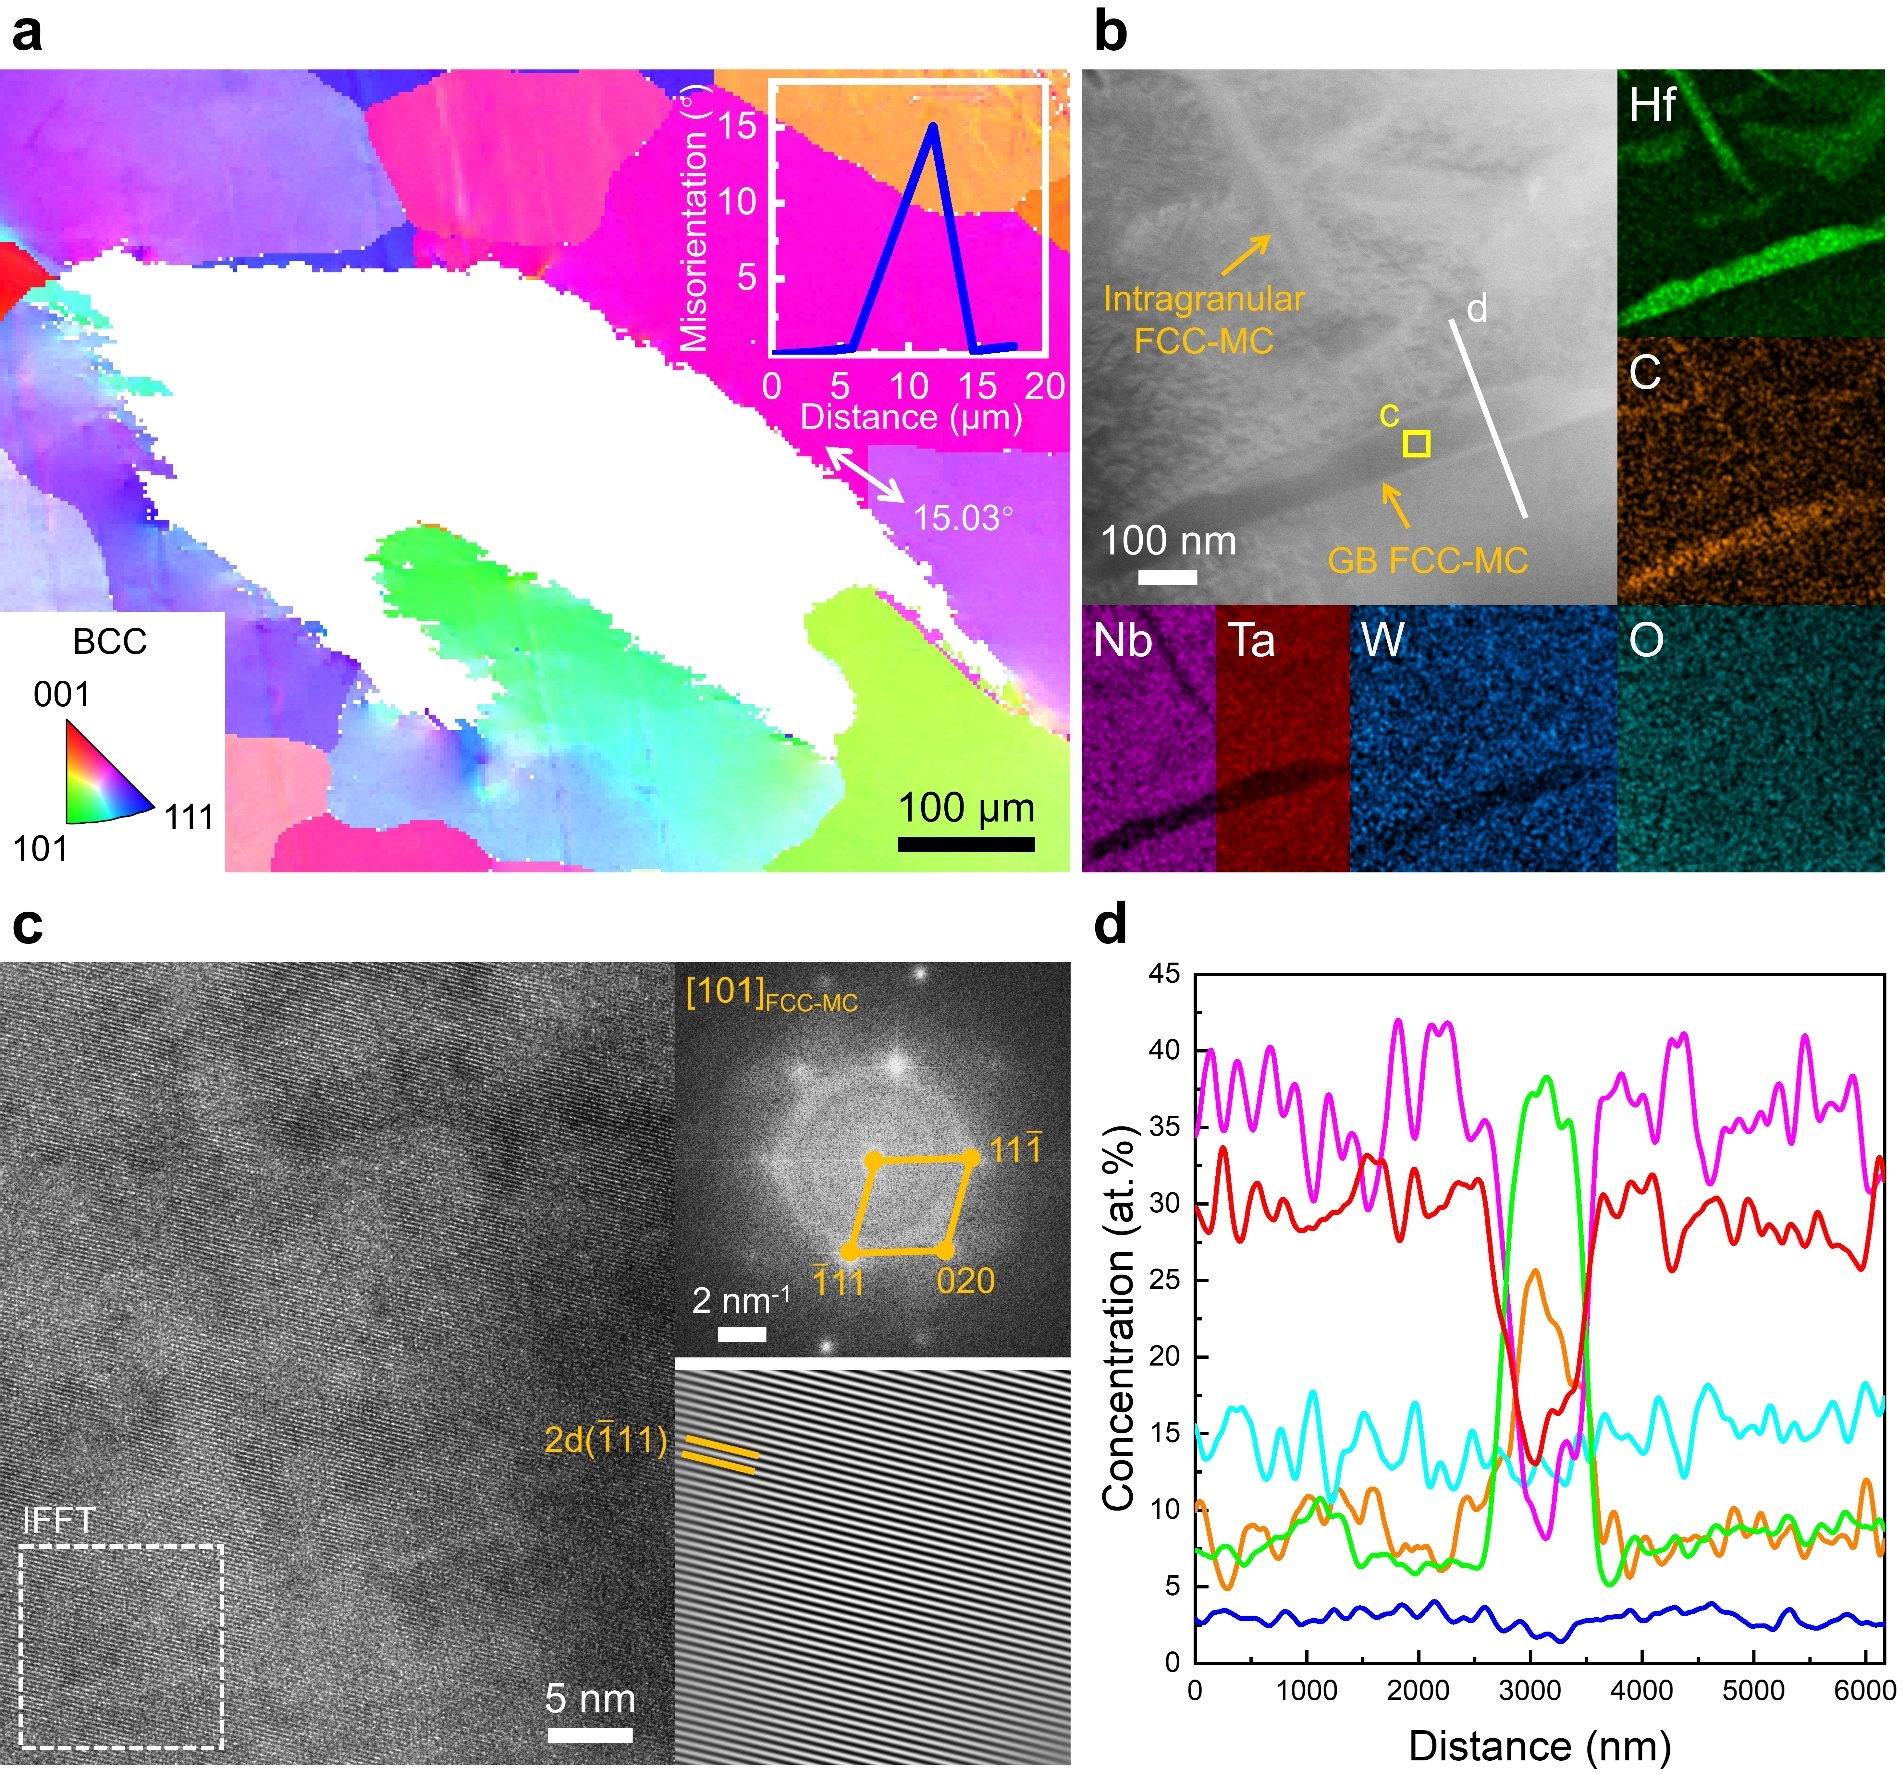


**Supplementary Fig. 11 | FCC-MC carbide at a 15.03° grain boundary in as-cast 0.8C alloy.** **a**, EBSD-IPF map of the region around the ion-milled perforation, and the misorientation profile of the studied GB. **b**, STEM-HAADF image and EDS mapping of the studied GB. **c**, HRTEM image of the GB FCC-MC carbide, corresponding FFT pattern and IFFT image. **d**, EDS line scanning as marked in **b**, with colors of each element line taken from the mapping in **b**.


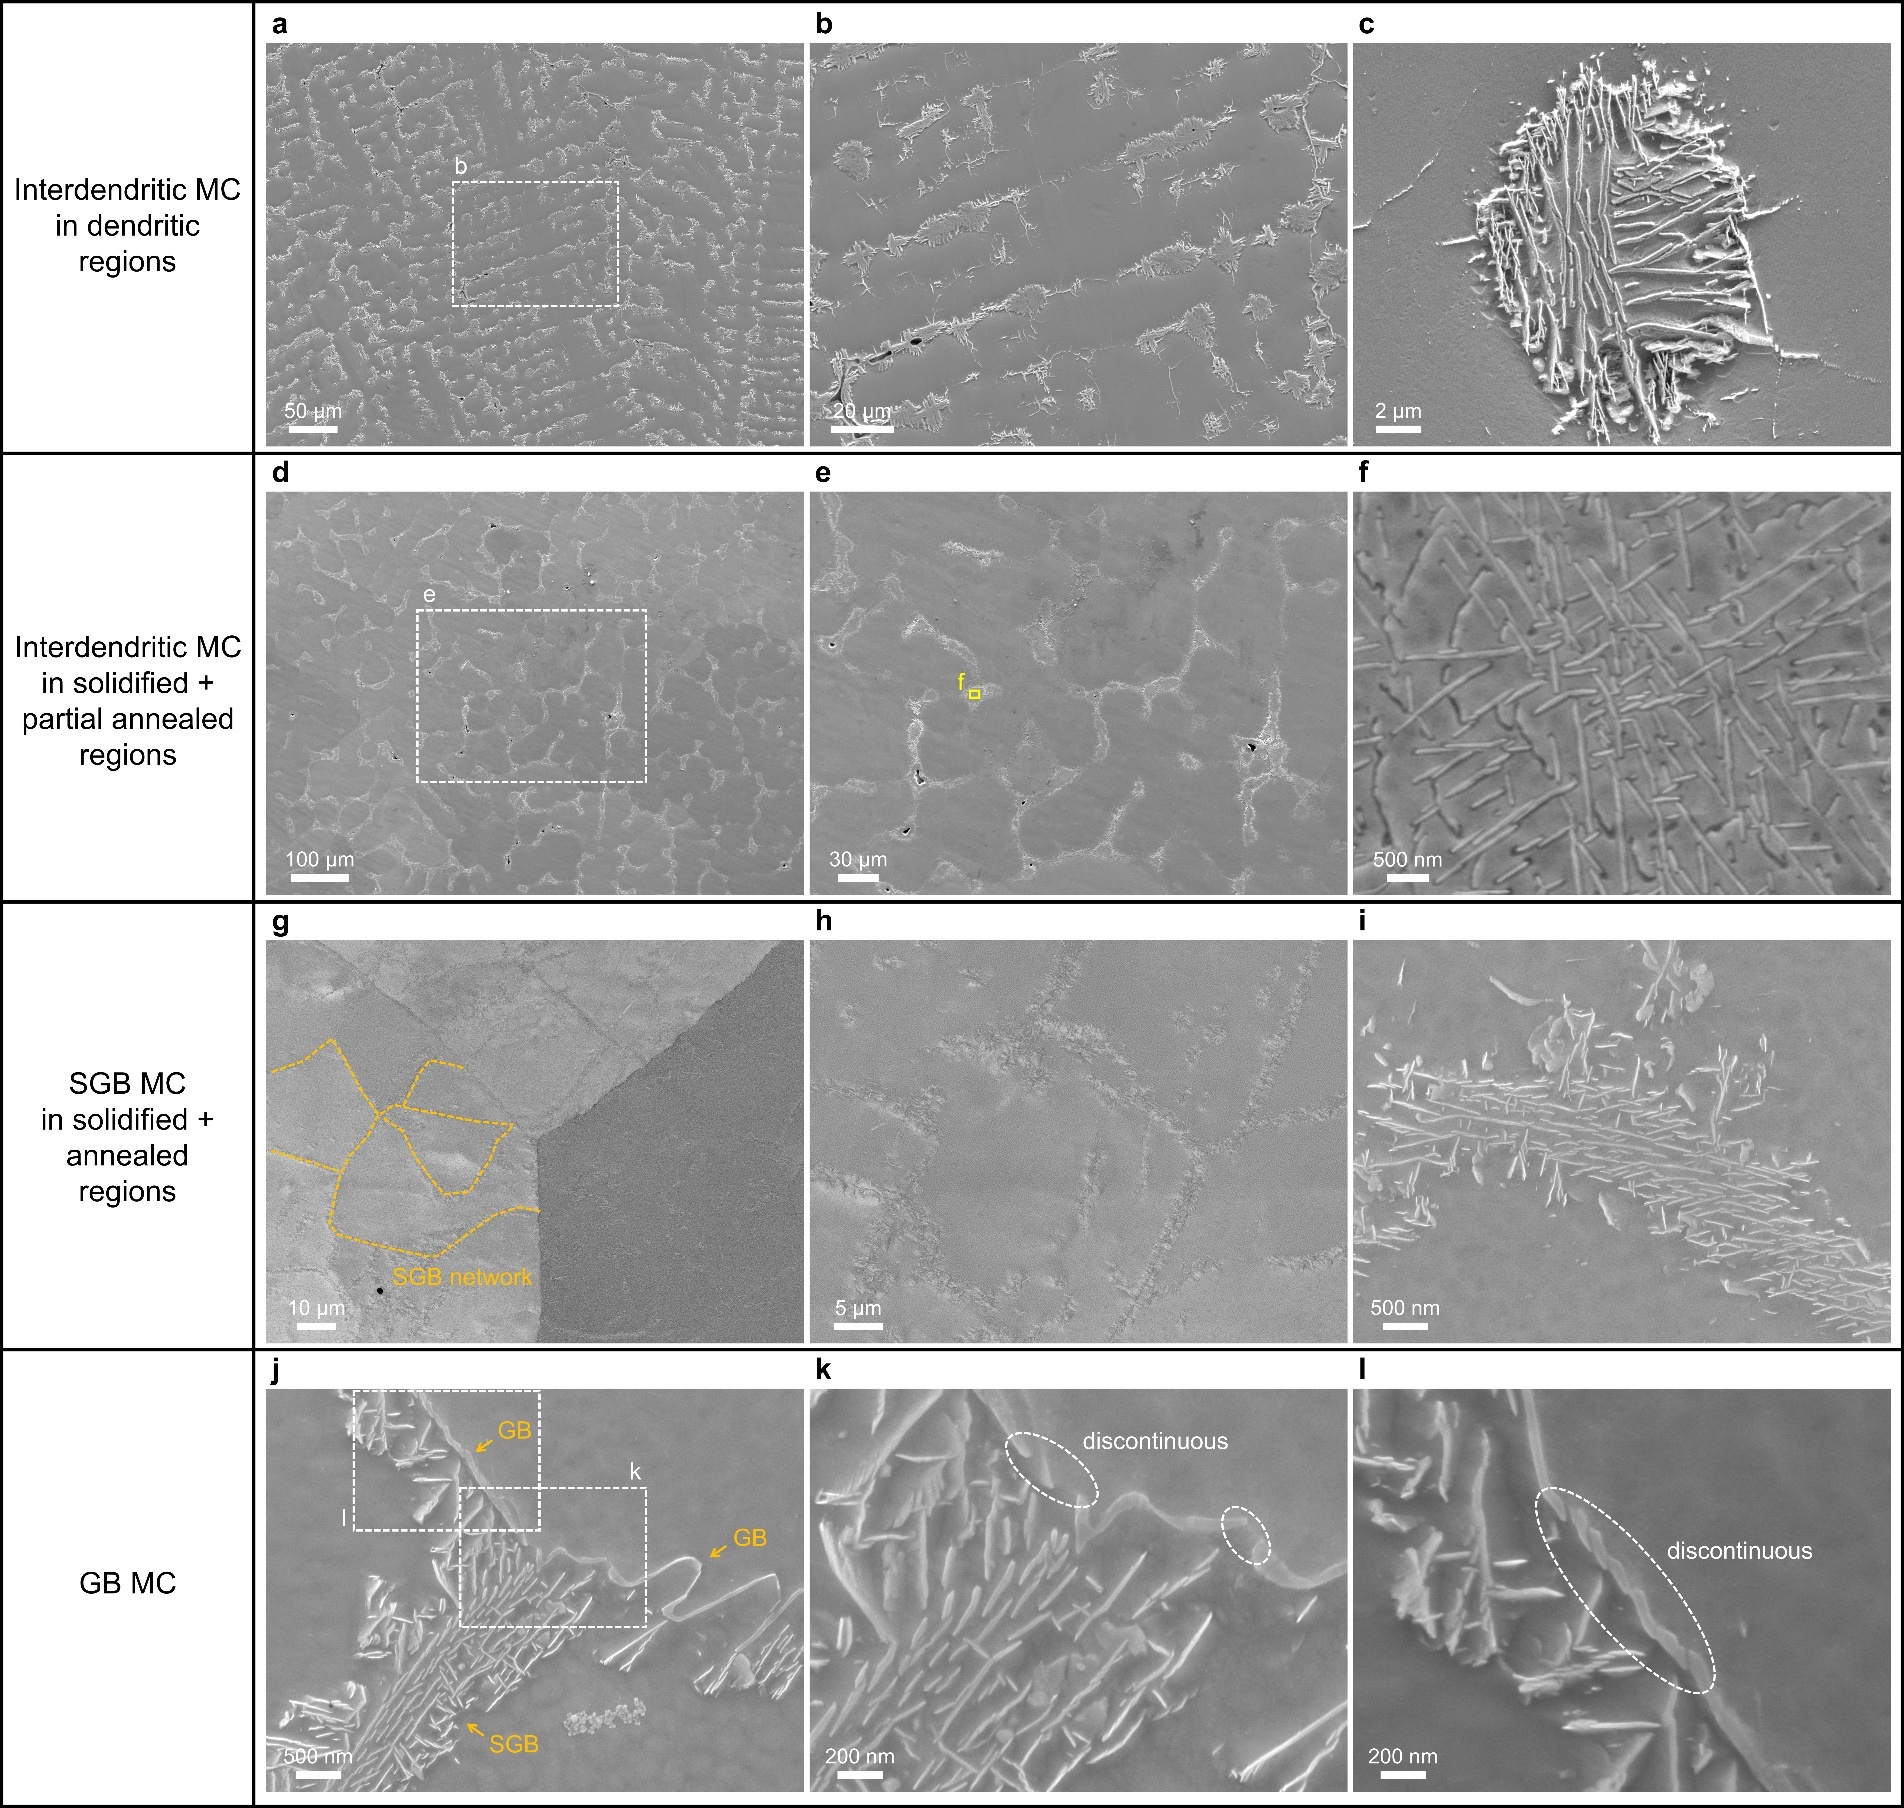


**Supplementary Fig. 12 | Evolution of FCC-MC carbides in 0.8C alloy.** **a**, Overall distribution of interdendritic MC in dendritic regions, corresponding to region 2 in Supplementary Fig. 2c. **b**, Magnified region in **a**. **c**, High-mag image showing the morphology of MC in a single interdendritic MC cluster. **d**, Overall distribution of interdendritic MC in solidified + partial annealed regions, corresponding to the transitional zone between region 2 and region 3 in Supplementary Fig. 2c. **e**, Magnified region in **d**. **f**, Magnified region in **e** showing the morphology of MC. **g**, Overall distribution of subgrain boundary (SGB) MC in solidified + completely annealed regions, corresponding to region 3 in Supplementary Fig. 2c. **h**, Magnified image showng the SGBs in a region to the left of **g**. **i**, High-mag image showing the morphology of MC at SGBs. **j-l**, Morphology of MC at GBs.


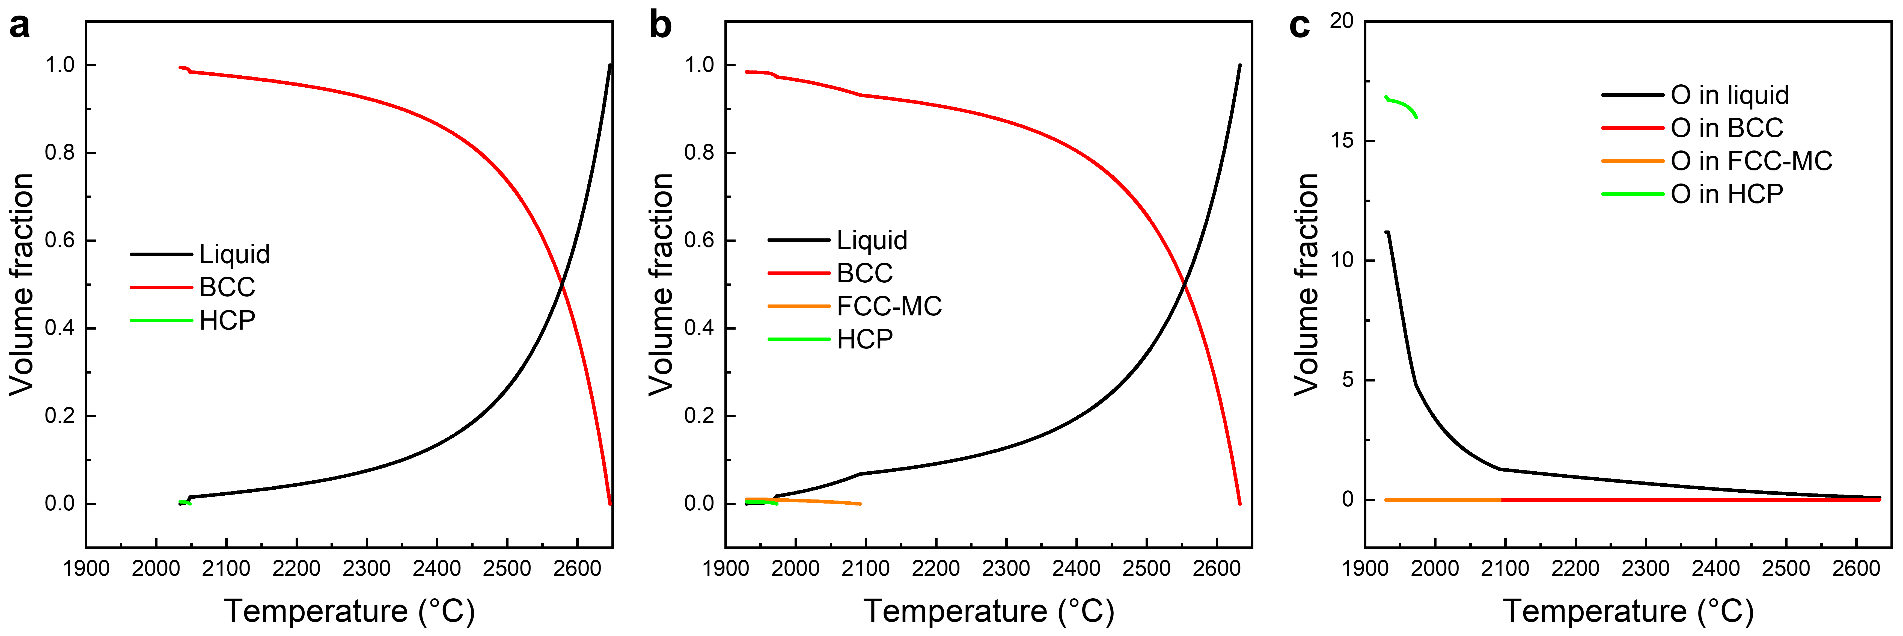


**Supplementary Fig. 13 | CALPHAD results of non-equilibrium cooling using Scheil solidification condition for 0C and 0.8C alloys.** **a**, 0C alloy. **b**, 0.8C alloy. **c**, Oxygen concentration in each phase in 0.8C alloy. Measured oxygen contents (0.09 at.% for 0C alloy and 0.054 at.% for 0.8C alloy) were incorporated as inputs. These results are partially erroneous, but can nevertheless point to certain solid conclusions, as analyzed in Supplementary Note 7.


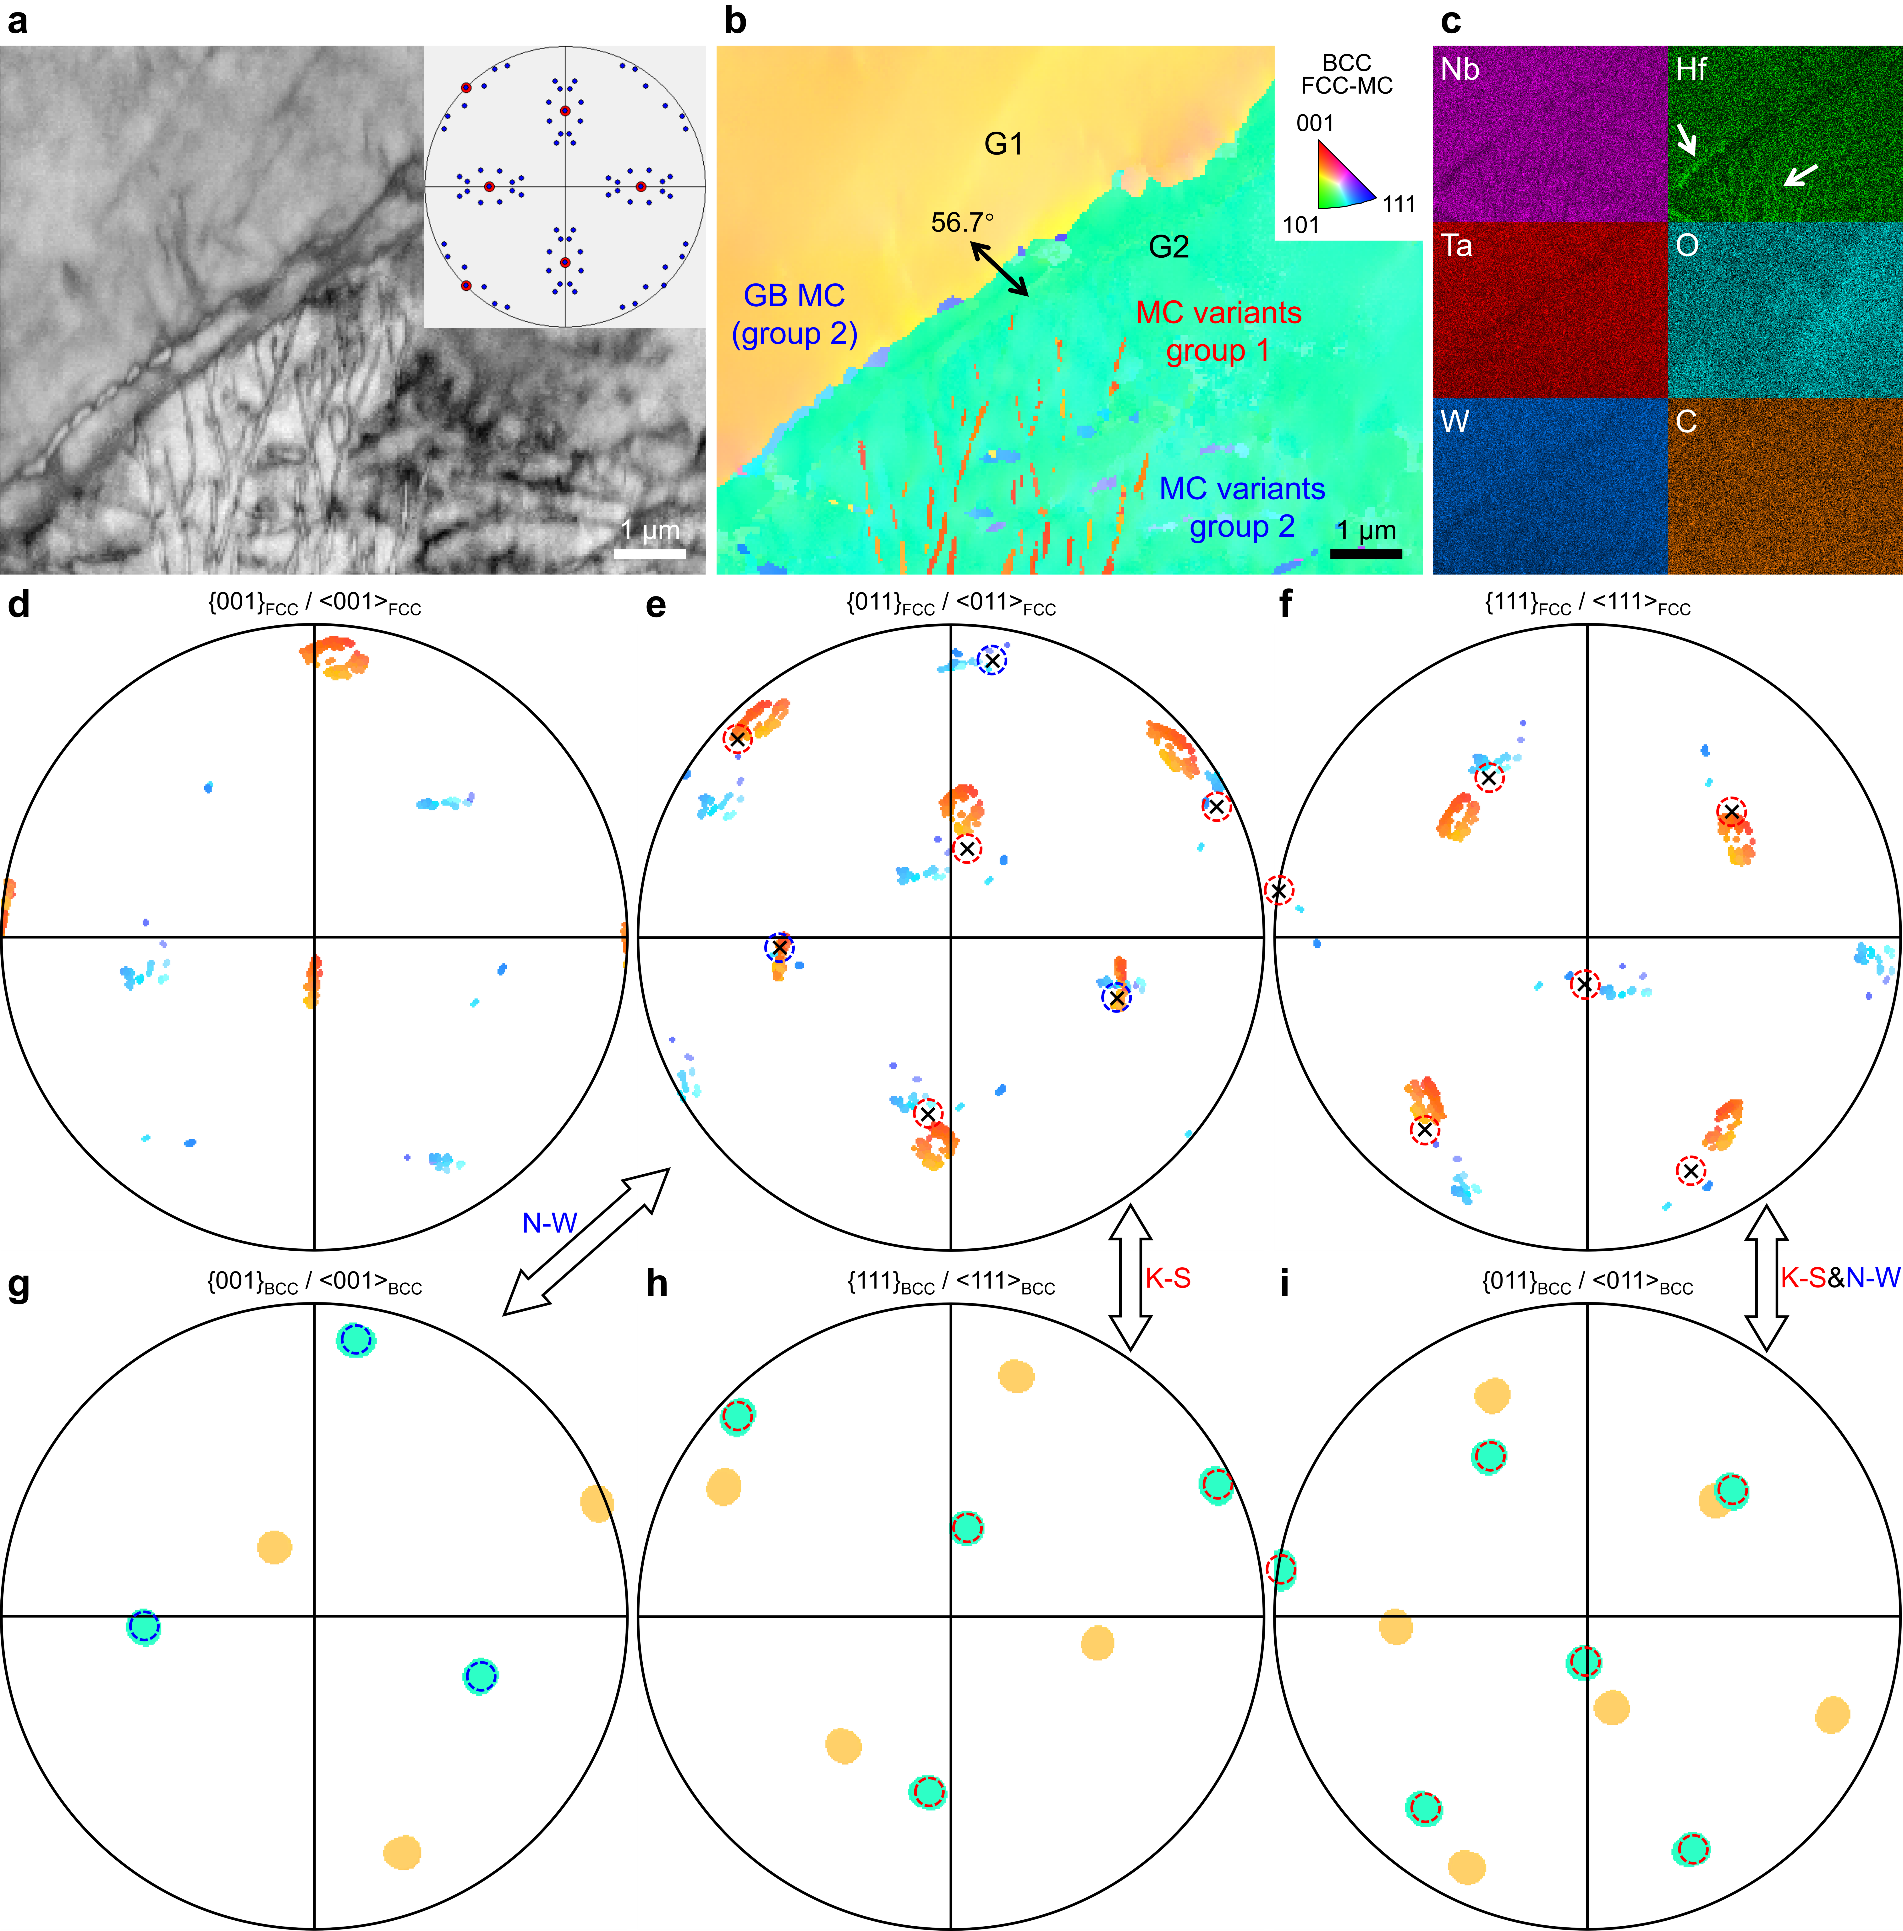


**Supplementary Fig. 14 | EBSD study of another grain boundary region containg both GB FCC-MC and intragranular FCC-MC in 0.8C alloy.** **a**, BC map; **b**, IPF map; **c**, corresponding elemental distributions (with white arrows pointing to Hf enrichment). The inset of **a** is a standard pole figure showing the {110} poles of the parent BCC phase (red) and the {111} poles of the 24 K-S variants (blue), generated via GenOVa software187. **d-i**, Pole figures of certain crystal plane/direction poles of the BCC grains and all the FCC-MC.


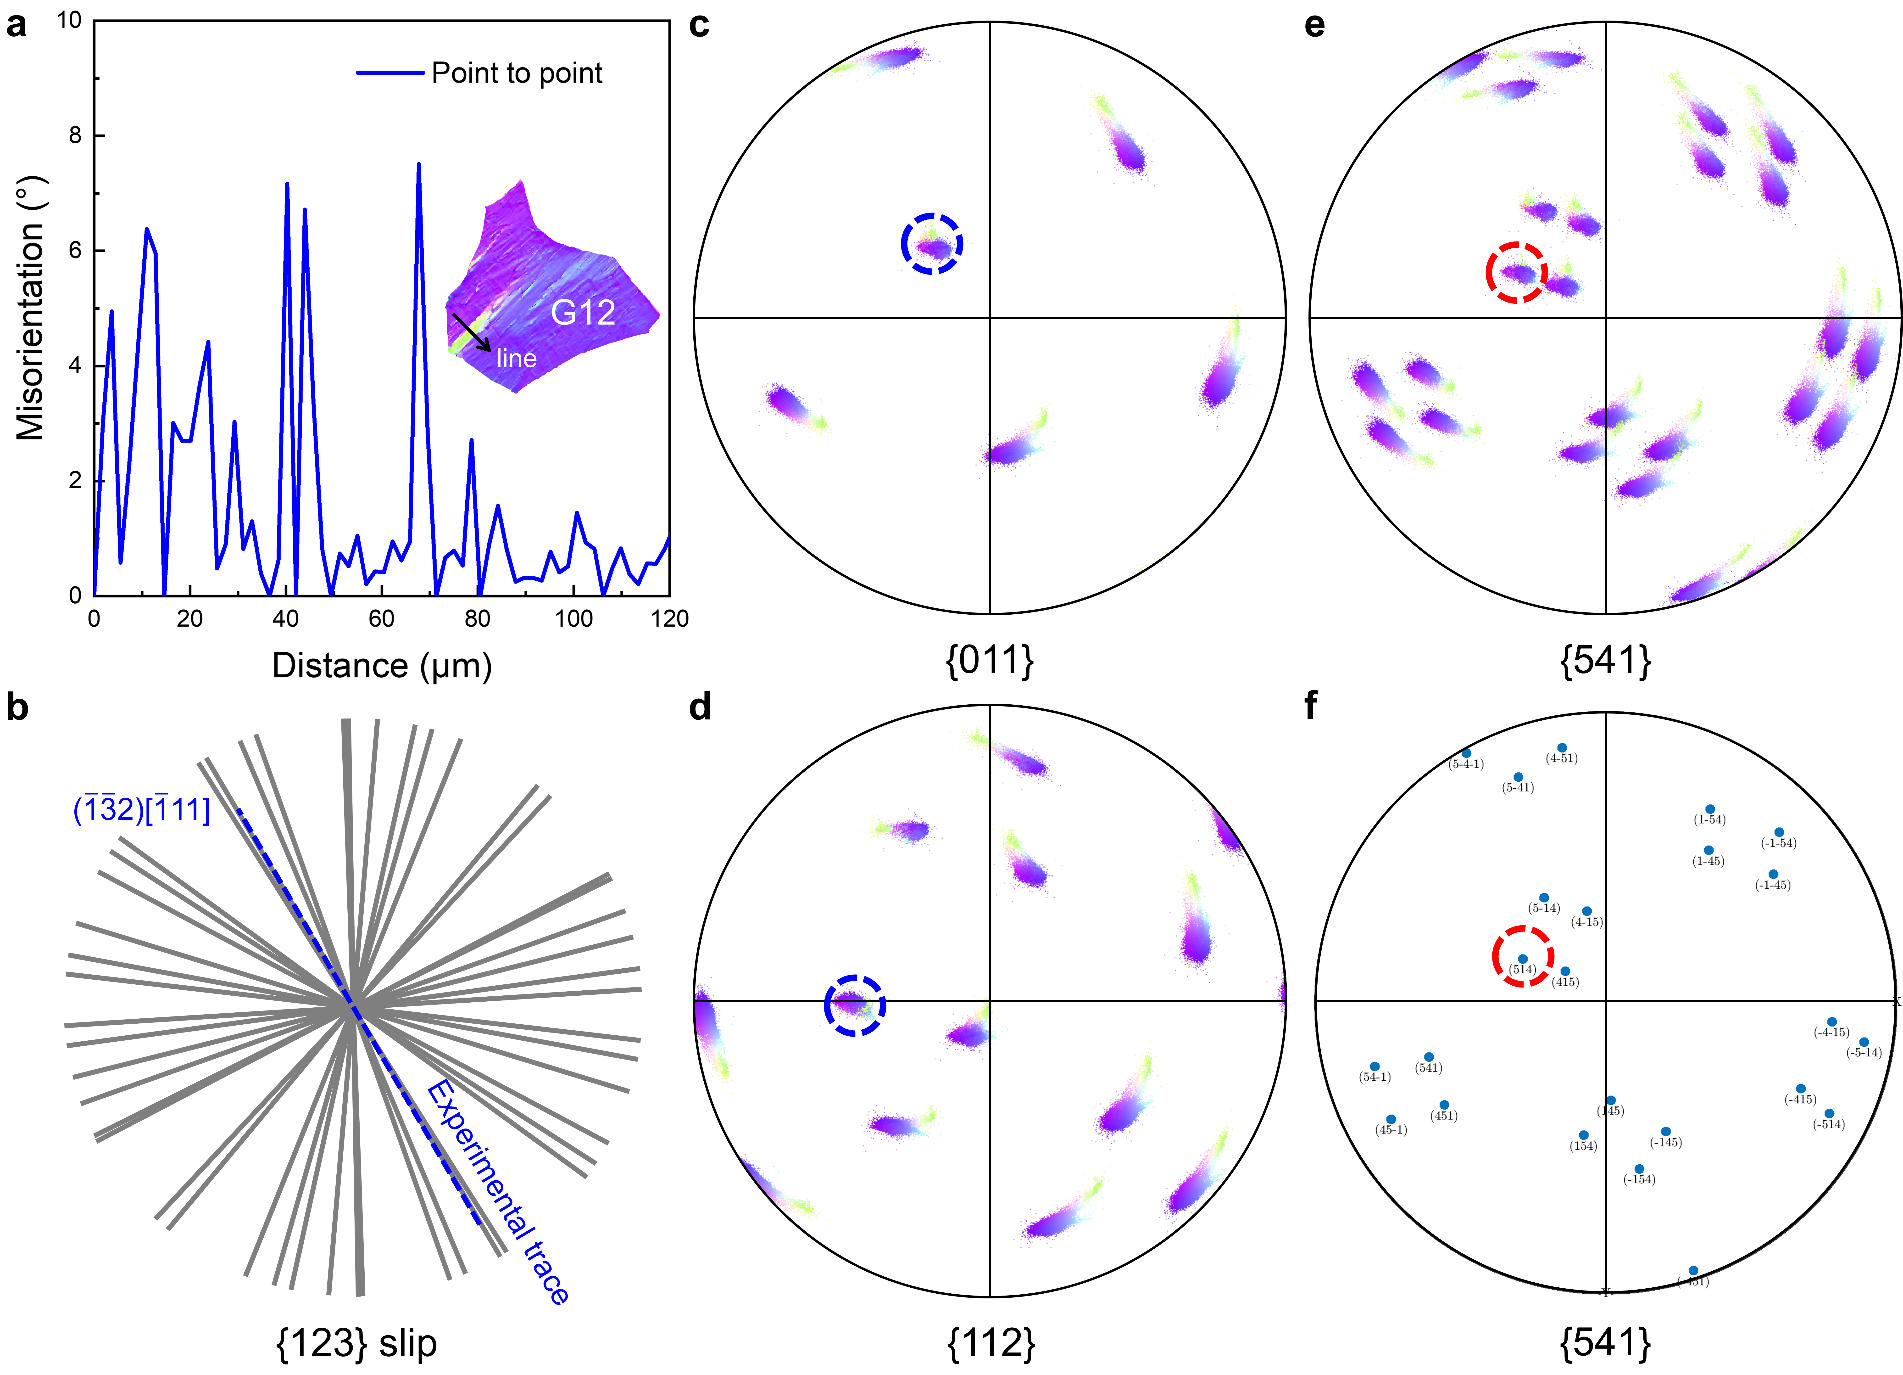


**Supplementary Fig. 15 | Identification of activated slip system of Grain 12 (G12) of 0.8C alloy in room temperature tension.** Both angular matching of experimental trace and intragranular misorientation aixs (IGMA) analysis were utilized and mutually verified. Corresponding to Fig. 5m and Supplementary Note 8. **a**, Misorientation profile along a line drawn in the grain inset. **b**, All theoretical {123}<111> slip traces of G12 and the comparison with the experimental trace. **c**, {011}; **d**, {112}; **e**, {541} pole figures of G12. **f**, {541} pole figure containing specific Miller indexes generated by MTEX.

**Supplementary Table 1 |** Room temperature tensile properties of Nb-Ta-Hf-W-C RCCAs with different contents of carbon microalloyed.

|  | **Yield strength**  ***σ*s (MPa)** | **Tensile strength**  ***σ*b (MPa)** | **Total elongation**  ***ε*t (%)** | **Uniform elongation**  ***ε*u (%)** | |
| --- | --- | --- | --- | --- | --- |
| **0C** | / | 487.9 | 0.33 | | / |
| **0.2C** | / | 308.3 | 0.11 | | / |
| **0.4C** | / | 674.7 | 0.41 | | / |
| **0.6C** | 653.3 | 743.1 | 12.7 | | 9.9 |
| **0.8C** | 682.2 | 807.0 | 13.3 | | 10.1 |
| **1C** | 602.7 | 718.9 | 11.4 | | 8.1 |

**Supplementary Table 2 |** Tensile yield strengths of various conventional refractory alloys at elevated temperatures188-192 for Fig. 1c.

|  | **wt%** | **at%** | **Temperature**  **(℃)** | **Yield strength (MPa)** |
| --- | --- | --- | --- | --- |
| **Nb-1Zr** | Nb-1Zr | Nb98.98Zr1.02 | 1093.333333 | 147.553 |
| 1371.111111 | 48.265 |
| 1482.222222 | 34.475 |
| 1648.888889 | 20.2713 |
| **D14** | Nb-5Zr | Nb94.91Zr5.09 | 648.8888889 | 386.12 |
| 871.1111111 | 372.33 |
| 1093.333333 | 193.06 |
| 1315.555556 | 89.635 |
| **B-33** | Nb-5V | Nb91.24V8.76 | 1093.333333 | 201.334 |
| 1204.444444 | 129.626 |
| 1315.555556 | 89.635 |
| 1371.111111 | 74.466 |
| 1510 | 57.2285 |
| 1704.444444 | 28.8211 |
| 1871.111111 | 16.548 |
| **C-103** | Nb-10Hf-1Ti | Nb92.57Hf5.41Ti2.02 | 1093.333333 | 126.868 |
| 1371.111111 | 71.0185 |
| 1482.222222 | 59.297 |
| 1648.888889 | 28.959 |
| **Cb-291** | Nb-10Ta-10W | Nb88.71Ta5.69W5.6 | 871.1111111 | 241.325 |
| 982.2222222 | 206.85 |
| 1093.333333 | 165.48 |
| 1204.444444 | 137.9 |
| 1315.555556 | 103.425 |
| 1371.111111 | 89.635 |
| 1426.666667 | 75.845 |
| 1537.777778 | 58.6075 |
| 1648.888889 | 48.265 |
| 1760 | 41.37 |
| 1871.111111 | 33.096 |
| **FS-85** | Nb-28Ta-10W-1Zr | Nb74.9Ta17.65Zr1.25W6.2 | 871.1111111 | 223.398 |
| 982.2222222 | 206.85 |
| 1093.333333 | 202.713 |
| 1260 | 148.2425 |
| 1371.111111 | 107.562 |
| 1426.666667 | 97.2195 |
| 1648.888889 | 71.708 |
| 1760 | 57.2285 |
| 1926.666667 | 39.991 |
| 2037.777778 | 19.9955 |
| **FS-82** | Nb-33Ta-1Zr | Nb78.61Ta20.18Zr1.21 | 871.1111111 | 393.015 |
| 1093.333333 | 293.0375 |
| 1204.444444 | 179.27 |
| 1371.111111 | 82.74 |
| **D-36** | Nb-10Ti-5Zr | Nb77.63Ti17.72Zr4.65 | 871.1111111 | 237.8775 |
| 1093.333333 | 158.585 |
| 1148.888889 | 137.9 |
| **D-31** | Nb-10Ti-10Mo-0.1C | Nb72.8Ti17.68Mo8.82C0.7 | 871.1111111 | 248.9095 |
| 982.2222222 | 225.4665 |
| 1093.333333 | 177.891 |
| 1260 | 110.32 |
| 1426.666667 | 55.16 |
| **AS-55** | Nb-5W-1Zr | Nb96.37Zr1.04W2.59 | 871.1111111 | 160.6535 |
| 1093.333333 | 125.489 |
| 1204.444444 | 110.32 |
| **D-43** | Nb-10W-1Zr-0.1C | Nb92.85Zr1.06W5.28C0.81 | 1093.333333 | 268.905 |
| 1204.444444 | 158.585 |
| 1315.555556 | 137.9 |
| 1426.666667 | 82.74 |
| **Cb-752** | Nb-10W-2.5Zr | Nb92.01Zr2.68W5.31 | 1093.333333 | 191.681 |
| 1204.444444 | 157.206 |
| 1315.555556 | 137.2105 |
| **C-129** | Nb-10W-10Hf | Nb88.63Hf5.77W5.6 | 1093.333333 | 200.6445 |
| 1371.111111 | 141.3475 |
| 1482.222222 | 120.6625 |
| 1648.888889 | 79.982 |
| **F-48** | Nb-15W-5Mo-1Zr | Nb85.46Zr1.1W8.2Mo5.24 | 1204.444444 | 270.284 |
| 1371.111111 | 177.891 |
| 1482.222222 | 160.6535 |
| **F-50** | Nb-15W-5Mo-5Ti-1Zr | Nb76.18Ti9.99Zr1.05W7.8Mo4.98 | 1093.333333 | 255.115 |
| 1204.444444 | 193.06 |
| **D-41** | Nb-20W-10Ti-6Mo | Nb64.43Ti19.54W10.18Mo5.85 | 982.2222222 | 330.96 |
| 1093.333333 | 313.7225 |
| 1260 | 158.585 |
| 1426.666667 | 137.9 |
| **B-66** | Nb-5V-5Mo-1Zr | Nb85.59V8.77Zr0.98Mo4.66 | 1093.333333 | 303.38 |
| 1204.444444 | 248.22 |
| 1315.555556 | 179.27 |
| 1426.666667 | 137.9 |
| **NTsAV8** | Nb-8W-4.25Zr-0.4N | Nb88.79Zr4.4W4.11N2.7 | 1200 | 300 |
| **WC-3009** | Nb-30Hf-9W | Nb75.16Hf19.24W5.6 | 1207 | 365 |
| 1317 | 190 |
| **Ta-10W** | Ta-10W | Ta90.14W9.86 | 1093.333333 | 379.9145 |
| 1204.444444 | 235.1195 |
| 1315.555556 | 239.2565 |
| 1371.111111 | 199.955 |
| 1648.888889 | 113.078 |
| **Ta-12.5W** | Ta-12.5W | Ta87.67W12.33 | 1198.888889 | 199.955 |
| 1482.222222 | 159.964 |
| 1648.888889 | 115.1465 |
| 1926.666667 | 68.95 |
| **Ta-30Nb-7.5V** | Ta-30Nb-7.5V | Nb39.6Ta42.3V18.1 | 982.2222222 | 379.225 |
| 1204.444444 | 241.325 |
| 1315.555556 | 186.165 |
| 1426.666667 | 137.9 |
| 1482.222222 | 117.215 |
| 1648.888889 | 55.16 |
| **Ta-5W-2.5Mo** | Ta-5W-2.5Mo | Ta90.57W4.82Mo4.62 | 1204.444444 | 275.8 |
| 1315.555556 | 206.85 |
| 1482.222222 | 117.215 |
| 1648.888889 | 82.74 |
| 1926.666667 | 55.16 |
| **T-111** | Ta-8W-2Hf | Ta90.09Hf2.03W7.88 | 1093.333333 | 240.6355 |
| 1204.444444 | 197.197 |
| 1315.555556 | 162.0325 |
| 1482.222222 | 168.238 |
| 1648.888889 | 82.0505 |
| 1926.666667 | 86.877 |
| **T-222** | Ta-10W-2.5Hf | Ta87.61Hf2.54W9.85 | 1093.333333 | 277.8685 |
| 1204.444444 | 264.768 |
| 1315.555556 | 260.631 |
| 1426.666667 | 202.0235 |
| 1537.777778 | 190.9915 |
| 1648.888889 | 166.1695 |
| 1926.666667 | 97.909 |
| **Ta-10W-2.5Mo** | Ta-10W-2.5Mo | Ta85.74W9.64Mo4.62 | 1482.222222 | 158.585 |
| 1648.888889 | 124.11 |
| 1926.666667 | 62.055 |
| **ASTAR-811C** | Ta-8W-1Re-0.7Hf-0.025C | Ta90.09Hf0.71W7.86Re0.96C0.38 | 1093.333333 | 206.85 |
| 1204.444444 | 186.165 |
| 1315.555556 | 179.27 |
| 1426.666667 | 172.375 |
| 1537.777778 | 158.585 |
| **Ta-8W-3.15Hf-0.01C** | Ta-8W-3.15Hf-0.01C | Ta88.79Hf3.19W7.87C0.15 | 1315.555556 | 232.3615 |
| 1648.888889 | 170.3065 |
| **ASTAR-1211C** | Ta-12W-1Re-0.7Hf-0.025C | Ta86.16Hf0.71W11.79Re0.96C0.38 | 1315.555556 | 301 |
| **ASTAR-1511C** | Ta-15W-1Re-0.7Hf-0.025C | Ta83.2Hf0.71W14.75Re0.96C0.38 | 1315.555556 | 317 |

**Supplementary Table 3 |** Schmid fators (*SF*s) of the activated slip systems of 0C alloy in room temperature tension. Slip systems with the maximum *SF* in the same slip plane family or in all three slip plane families are marked in blue.

|  | **Slip system** | ***SF*** | **Max *SF*** | **Slip plane with max *SF*** | **Max *SF* in same plane family** |
| --- | --- | --- | --- | --- | --- |
| **G1** | (0-11)[-111] | 0.395 | 0.499 | (-2-31) | 0.462 |
| (110)[-111] | 0.462 |
| (2-11)[11-1] | 0.271 | 0.495 |
| (112)[11-1] | 0.128 |
| (21-3)[111] | 0.153 | 0.499 |
| (-2-31)[-111] | 0.499 |
| **G2** | (2-11)[11-1] | 0.495 | 0.495 | (2-11) | 0.495 |
| **G3** | (011)[1-11] | 0.445 | 0.494 | (-112) | 0.445 |
|  | (-12-3)[-111] | 0.428 | 0.491 |
| **G4** | (21-1)[1-11] | 0.361 | 0.456 | (-110) | 0.410 |
| **G5** | (121)[1-11] | 0.488 | 0.499 | (2-3-1) | 0.491 |
| (12-1)[-111] | 0.395 |
| (-2-31)[-111] | 0.377 | 0.499 |
| **G6** | (110)[1-11] | 0.477 | 0.497 | (32-1) | 0.477 |
| (121)[1-11] | 0.344 | 0.483 |
| (21-1)[1-11] | 0.483 |
| **G7** | (121)[1-11] | 0.267 | 0.499 | (-12-3) | 0.496 |
|  | (-213)[1-11] | 0.371 | 0.499 |
| **G8** | (13-2)[-111] | 0.367 | 0.478 | (1-2-3) | 0.478 |
| **G9** | (10-1)[1-11] | 0.429 | 0.498 | (-112) | 0.434 |

**Supplementary Table 4 |** Semi-quantitative concentration of grain boundary HfO2 in as-cast 0C alloy obtained from TEM-EDS. The position is taken inside the oxide phase in Extended Data Fig. 3b.

|  | **Concentration (at.%)** |
| --- | --- |
| **Nb** | 4.74 ± 1.23 |
| **Ta** | 2.3 ± 0.32 |
| **Hf** | 32.94 ± 2.44 |
| **W** | 0.49 ± 0.18 |
| **O** | 59.53 ± 2.31 |

**Supplementary Table 5 |** Observed orientation relationships (ORs) between HfO2/ZrO2 (whether monoclinic or tetragonal) and metallic BCC phase in literature. Marked in blue if the oxide is HfO2 instead of ZrO2.

|  | **State** | **Characterization** | **OR (plane)** | **OR (direction)** |
| --- | --- | --- | --- | --- |
| **C-103 - m**2 | Hot forged | EBSD | (001)BCC // (001)m | [001]BCC // [103]m |
| **Nb521 - m**193 | LPBF + HT at 1400℃ | HRTEM-FFT | (110)BCC // (01)m | [10]BCC // [100]m |
| **Nb521 - m**115 | LPBF + HT at 1400℃ | SAED | (011)BCC // (100)m (01)BCC // (00)m | [100]BCC // [010]m |
| **α-Fe - t**194 | Mechanical alloyed | HRTEM-FFT | (002)BCC // (002)t | [120]BCC // [010]t |
| **Nb-1Zr - t**134 | HT at 1700℃ | SAED | (110)BCC // (200)t | [001]BCC // [001]t |
| **Nb - t'**195 | Diffusion bonded | Laue X-ray | (125)BCC // (110)t' | [16 5]BCC // [001]t' |
| **Nb - t'**196 | Hot pressed at 1500℃ | HRTEM-FFT | (110)BCC // (110)t' | / |

**Notes:** Here m stands for monoclinic phase, t for retained tetragonal phase due to small grain sizes, t’ for stabilized tetragonal phase by Y2O3 addition, LPBF for laser powder bed fusion, HT for heat treatment, HRTEM for high resolution transmission electron microscopy, FFT for fast Fourier transform, and SAED for selected area electron diffraction.

**Supplementary Table 6 |** Semi-quantitative concentration of grain boundary FCC-MC in as-cast 0.8C alloy obtained from TEM-EDS. The position is taken inside the carbide phase in Fig. 4h.

|  | **Concentration (at.%)** |
| --- | --- |
| **Nb** | 9.34 ± 0.99 |
| **Ta** | 22.30 ± 1.54 |
| **Hf** | 32.37 ± 2.68 |
| **W** | 1.58 ± 0.13 |
| **O** | 10.60 ± 1.25 |
| **C** | 23.81 ± 2.06 |

**Supplementary Table 7 |** Schmid fators (*SF*s) of the activated slip systems of 0.8C alloy in room temperature tension. Slip systems with the maximum *SF* in the same slip plane family or in all three slip plane families are marked in blue.

|  | **Slip system** | ***SF*** | **Max *SF*** | **Slip plane with max *SF*** | **Max *SF* in same plane family** |
| --- | --- | --- | --- | --- | --- |
| **G5** | (13-2)[-111] | 0.455 | 0.461 | (12-1) | 0.455 |
| (312)[-111] | 0.143 |
| **G6** | (011)[1-11] | 0.273 | 0.498 | (2-13) | 0.483 |
| (10-1)[1-11] | 0.428 |
| **G7** | (10-1)[1-11] | 0.428 | 0.498 | (2-13) | 0.483 |
| **G8** | (-110)[11-1] | 0.449 | 0.493 | (-121) | 0.471 |
| (231)[1-11] | 0.479 | 0.492 |
| **G9** | (231)[1-11] | 0.440 | 0.489 | (110) | 0.485 |
| **G10** | (0-11)[-111] | 0.491 | 0.491 | (0-11) | 0.491 |
| **G12** | (-1-32)[-111] | 0.398 | 0.454 | (-2-31) | 0.454 |
| **G13** | (2-11)[11-1] | 0.497 | 0.498 | (3-21) | 0.497 |
| **G14** | (-110)[11-1] | 0.456 | 0.498 | (3-21) | 0.456 |
| **G15** | (110)[1-11] | 0.325 | 0.496 | (101) | 0.496 |

**Supplementary references**

1 Belcher, C. H. *et al.* The origin and control of interstitial impurities in refractory complex concentrated alloys. *Journal of Alloys and Compounds* **1010**, 177520 (2025). <https://doi.org:https://doi.org/10.1016/j.jallcom.2024.177520>

2 Dhole, A., Bhattacharya, A., Gupta, R. K., Gokhale, A. A. & Samajdar, I. The role of the metal-oxide Interface’s terminating layer on the selective cold cracking of a commercial Niobium–Hafnium–Titanium (C-103) alloy. *Journal of Alloys and Compounds* **856**, 157427 (2021). <https://doi.org:https://doi.org/10.1016/j.jallcom.2020.157427>

3 Sahragard-Monfared, G. *et al.* Tensile creep behavior of the Nb45Ta25Ti15Hf15 refractory high entropy alloy. *Acta Materialia* **272** (2024). <https://doi.org:10.1016/j.actamat.2024.119940>

4 Hahn, G. T., Gilbert, A. & Jaffee, R. I. *The Effects of Solutes on the Ductile-to-brittle Transition of Refractory Metals*. Vol. 155 (Defense Metals Information Center, Battelle Memorial Institute, 1962).

5 Backman, L., Gild, J., Luo, J. & Opila, E. J. Part I: Theoretical predictions of preferential oxidation in refractory high entropy materials. *Acta Materialia* **197**, 20-27 (2020). <https://doi.org:10.1016/j.actamat.2020.07.003>

6 Belcher, C. H., MacDonald, B. E., Apelian, D. & Lavernia, E. J. The role of interstitial constituents in refractory complex concentrated alloys. *Progress in Materials Science* **137** (2023). <https://doi.org:10.1016/j.pmatsci.2023.101140>

7 Messmer, R. P. & Briant, C. L. The role of chemical bonding in grain boundary embrittlement. *Acta Metallurgica* **30**, 457-467 (1982). <https://doi.org:https://doi.org/10.1016/0001-6160(82)90226-7>

8 Zou, Y. *et al.* Fracture properties of a refractory high-entropy alloy: In situ micro-cantilever and atom probe tomography studies. *Scripta Materialia* **128**, 95-99 (2017). <https://doi.org:https://doi.org/10.1016/j.scriptamat.2016.09.036>

9 Wang, Z. *et al.* Solving oxygen embrittlement of refractory high-entropy alloy via grain boundary engineering. *Materials Today* **54**, 83-89 (2022). <https://doi.org:10.1016/j.mattod.2022.02.006>

10 Sun, Z., Du, R., Zhang, F., Zhuo, E. & Qiao, Y. Comparative study of microstructure and mechanical properties of Nb-Ti-Al alloy fabricated by as-cast and laser directed energy deposition processing. *International Journal of Refractory Metals and Hard Materials* **131** (2025). <https://doi.org:10.1016/j.ijrmhm.2025.107220>

11 Jing, K. *et al.* Excellent high-temperature strength and ductility of the ZrC nanoparticles dispersed molybdenum. *Acta Materialia* **227** (2022). <https://doi.org:10.1016/j.actamat.2022.117725>

12 Leitner, K. *et al.* How grain boundary chemistry controls the fracture mode of molybdenum. *Materials & Design* **142**, 36-43 (2018). <https://doi.org:10.1016/j.matdes.2018.01.012>

13 Liu, T. *et al.* Oxygen content effect on mechanical properties and microstructure of TZM alloy. *Materials Characterization* **203**, 113075 (2023). <https://doi.org:https://doi.org/10.1016/j.matchar.2023.113075>

14 Gludovatz, B., Wurster, S., Weingärtner, T., Hoffmann, A. & Pippan, R. Influence of impurities on the fracture behaviour of tungsten. *Philosophical Magazine* **91**, 3006-3020 (2011). <https://doi.org:10.1080/14786435.2011.558861>

15 Duan, X. *et al.* Effect of Ta on the microstructure and mechanical properties of WTa alloys prepared by arc melting. *Materials Characterization* **188**, 111823 (2022). <https://doi.org:https://doi.org/10.1016/j.matchar.2022.111823>

16 Zou, Y., Maiti, S., Steurer, W. & Spolenak, R. Size-dependent plasticity in an Nb25Mo25Ta25W25 refractory high-entropy alloy. *Acta Materialia* **65**, 85-97 (2014). <https://doi.org:https://doi.org/10.1016/j.actamat.2013.11.049>

17 Tong, Y. *et al.* Mechanical performance of (NbTaW)1−xMox (x = 0, 0.05, 0.15, 0.25) refractory high entropy alloys: Perspective from experiments and first principles calculations. *Journal of Alloys and Compounds* **873** (2021). <https://doi.org:10.1016/j.jallcom.2021.159740>

18 Sun, B. *et al.* Promoted high-temperature strength and room-temperature plasticity synergy by tuning dendrite segregation in NbMoTaW refractory high-entropy alloy. *International Journal of Refractory Metals and Hard Materials* **118** (2024). <https://doi.org:10.1016/j.ijrmhm.2023.106469>

19 Chen, W. *et al.* Revealing the room temperature superplasticity in bulk recrystallized molybdenum. *Nature Communications* **14** (2023). <https://doi.org:10.1038/s41467-023-44056-7>

20 Tsuru, T. *et al.* Intrinsic factors responsible for brittle versus ductile nature of refractory high-entropy alloys. *Nature Communications* **15** (2024). <https://doi.org:10.1038/s41467-024-45639-8>

21 Borges, P. P. P. O., Ritchie, R. O. & Asta, M. Electronic descriptors for dislocation deformation behavior and intrinsic ductility in bcc high-entropy alloys. *Science Advances* **10**, eadp7670 (2024). <https://doi.org:doi:10.1126/sciadv.adp7670>

22 Borges, P. P. P. O., Ritchie, R. O. & Asta, M. Tunable energy landscape of screw dislocation cores by compositional fluctuations in bcc high-entropy alloys from first-principles calculations. *Physical Review Materials* **9**, 093602 (2025). <https://doi.org:10.1103/2xb2-7nn7>

23 Duesbery, M. S. & Vitek, V. Plastic anisotropy in b.c.c. transition metals. *Acta Materialia* **46**, 1481-1492 (1998). <https://doi.org:https://doi.org/10.1016/S1359-6454(97)00367-4>

24 Wadsworth, J., Nieh, T. & Stephens, J. Recent advances in aerospace refractory metal alloys. *International materials reviews* **33**, 131-150 (1988).

25 Noda, T., Okada, M. & Tominaga, N. AES analysis of embrittled molybdenum and TZM-Mo alloy in an oxidizing atmosphere. *Journal of Nuclear Materials* **101**, 354-358 (1981). <https://doi.org:https://doi.org/10.1016/0022-3115(81)90177-X>

26 Krajnikov, A. V., Morito, F. & Danylenko, M. I. Embrittlement of molybdenum–rhenium welds under low and high temperature neutron irradiation. *Journal of Nuclear Materials* **444**, 404-415 (2014). <https://doi.org:https://doi.org/10.1016/j.jnucmat.2013.10.027>

27 Kumar, P. *et al.* Degradation of the mechanical properties of NbMoTaW refractory high-entropy alloy in tension. *Acta Materialia* **279** (2024). <https://doi.org:10.1016/j.actamat.2024.120297>

28 Brosse, J. B., Fillit, R. & Biscondi, M. Intrinsic intergranular brittleness of molybdenum. *Scripta Metallurgica* **15**, 619-623 (1981). <https://doi.org:https://doi.org/10.1016/0036-9748(81)90038-7>

29 Krajnikov, A. V., Drachinskiy, A. S. & Slyunyaev, V. N. Grain boundary segregation in recrystallized molybdenum alloys and its effect on brittle intergranular fracture. *International Journal of Refractory Metals and Hard Materials* **11**, 175-180 (1992). <https://doi.org:https://doi.org/10.1016/0263-4368(92)90060-F>

30 Kanchi, A., Rajulapati, K. V., Rao, B. S., Sivaprahasam, D. & Gundakaram, R. C. Influence of Thermomechanical Processing on Microstructure and Mechanical Properties of MoNbTaW Refractory High-Entropy Alloy. *Journal of Materials Engineering and Performance* **31**, 7964-7972 (2022). <https://doi.org:10.1007/s11665-022-06855-9>

31 Wang, Z.-Q. *et al.* Suppressing effect of carbon on oxygen-induced embrittlement in molybdenum grain boundary. *Computational Materials Science* **198**, 110676 (2021). <https://doi.org:https://doi.org/10.1016/j.commatsci.2021.110676>

32 Ahmadian, A. *et al.* Aluminum depletion induced by co-segregation of carbon and boron in a bcc-iron grain boundary. *Nat Commun* **12**, 6008 (2021). <https://doi.org:10.1038/s41467-021-26197-9>

33 Dong, X. *et al.* Interfacial boron segregation in a high-Mn and high-Al multiphase lightweight steel. *Acta Materialia* **283** (2025). <https://doi.org:10.1016/j.actamat.2024.120568>

34 Zhou, X. *et al.* Boron triggers grain boundary structural transformation in steel. *Nature Communications* **16**, 6927 (2025). <https://doi.org:10.1038/s41467-025-62264-1>

35 Kumar, A. & Eyre, B. L. Grain boundary segregation and intergranular fracture in molybdenum. *Proceedings of the Royal Society of London: A* **370**, 431-458 (1980). <https://doi.org:https://doi.org/10.1098/rspa.1980.0043>

36 Leitner, K. *et al.* Grain boundary segregation engineering in as-sintered molybdenum for improved ductility. *Scripta Materialia* **156**, 60-63 (2018). <https://doi.org:10.1016/j.scriptamat.2018.07.008>

37 Wurmshuber, M. *et al.* Tuning mechanical properties of ultrafine-grained tungsten by manipulating grain boundary chemistry. *Acta Materialia* **232** (2022). <https://doi.org:10.1016/j.actamat.2022.117939>

38 Kang, B. *et al.* Effect of boron addition on the microstructure and mechanical properties of refractory Al0.1CrNbVMo high-entropy alloy. *International Journal of Refractory Metals and Hard Materials* **100** (2021). <https://doi.org:10.1016/j.ijrmhm.2021.105636>

39 Yin, Y. *et al.* Research on Microstructure, Mechanical Properties, and High-Temperature Stability of Hot-Rolled Tungsten Hafnium Alloy. *Materials (Basel)* **17** (2024). <https://doi.org:10.3390/ma17153663>

40 Xu, J. *et al.* Enhancing the strength and plasticity of laser powder bed fused NbMoTaW refractory high-entropy alloy via Ti alloying. *Journal of Alloys and Compounds* **1001** (2024). <https://doi.org:10.1016/j.jallcom.2024.175043>

41 Li, Y. *et al.* Ultrastrong, high plasticity, and softening-resistant refractory high-entropy alloy via stable isostructural coherent interfaces. *Scripta Materialia* **254** (2025). <https://doi.org:10.1016/j.scriptamat.2024.116337>

42 Bonnekoh, C. *et al.* The brittle-to-ductile transition in cold rolled tungsten plates: Impact of crystallographic texture, grain size and dislocation density on the transition temperature. *International Journal of Refractory Metals and Hard Materials* **78**, 146-163 (2019). <https://doi.org:10.1016/j.ijrmhm.2018.09.010>

43 Lloyd, M. J. *et al.* Ductilisation of tungsten using rolling and rhenium alloying. *International Journal of Refractory Metals and Hard Materials* **133** (2025). <https://doi.org:10.1016/j.ijrmhm.2025.107352>

44 Ren, C. *et al.* An investigation of the microstructure and ductility of annealed cold-rolled tungsten. *Acta Materialia* **162**, 202-213 (2019). <https://doi.org:10.1016/j.actamat.2018.10.002>

45 Xu, H. *et al.* Mechanical and microstructural responses in molybdenum-rhenium alloys under hot compressions. *Journal of Materials Research and Technology* **30**, 3877-3885 (2024). <https://doi.org:https://doi.org/10.1016/j.jmrt.2024.04.063>

46 Lied, P. *et al.* Comparison of K-doped and pure cold-rolled tungsten sheets: Tensile properties and brittle-to-ductile transition temperatures. *Journal of Nuclear Materials* **544** (2021). <https://doi.org:10.1016/j.jnucmat.2020.152664>

47 Lied, P. *et al.* Comparison of K-doped and pure cold-rolled tungsten sheets: Microstructure restoration in different temperature regimes. *International Journal of Refractory Metals and Hard Materials* **113** (2023). <https://doi.org:10.1016/j.ijrmhm.2023.106198>

48 Miao, S., Zhao, Y., Xie, Z., Zeng, L. & Lin, Y. On the ductilisation and the resistance to annealing-induced embrittlement of high-strength W–Re and nano-particle doped W-Re-ZrC alloys. *Materials Science and Engineering: A* **861** (2022). <https://doi.org:10.1016/j.msea.2022.144334>

49 Chen, Y. *et al.* The origin of exceptionally large ductility in molybdenum alloys dispersed with irregular-shaped La(2)O(3) nano-particles. *Nat Commun* **15**, 4105 (2024). <https://doi.org:10.1038/s41467-024-48439-2>

50 Zhang, W., Chen, W., Li, Y., He, X. & Zhou, Z. Achieving synergistic strength-ductility enhancement of HfC fine-particle dispersed molybdenum alloy. *Journal of Alloys and Compounds* **1027** (2025). <https://doi.org:10.1016/j.jallcom.2025.180600>

51 Chen, W. *et al.* In-situ EBSD investigation on deformation mechanism of room temperature superplasticity of bulk recrystallized molybdenum. *Materials Characterization* **216** (2024). <https://doi.org:10.1016/j.matchar.2024.114248>

52 Huang, L. *et al.* Enhancing strength-ductility in fine-grain Mo re alloy fibers. *International Journal of Refractory Metals and Hard Materials* **133** (2025). <https://doi.org:10.1016/j.ijrmhm.2025.107335>

53 Lin, X. *et al.* Enhanced mechanical property in molybdenum-rhenium alloy via high-temperature aging. *Journal of Alloys and Compounds* **1034** (2025). <https://doi.org:10.1016/j.jallcom.2025.181251>

54 Bamisaye, O. S., Maledi, N., Merwe, J. V. d., Klenam, D. & Bodunrin, M. Flow Behavior and Microstructure of Hot‐Worked TiNbTaVW Refractory High‐Entropy Alloy. *Advanced Engineering Materials* **26** (2024). <https://doi.org:10.1002/adem.202400538>

55 Ko, P.-H., Lee, Y.-J., Wang, J.-H., Tsai, C.-Y. & Chang, S.-Y. Boron interstitials strengthening grain boundary for toughening Hf Mo0.5NbTa TiV1.5-Zr refractory high-entropy alloys. *Materials Science and Engineering: A* **923** (2025). <https://doi.org:10.1016/j.msea.2024.147694>

56 Li, Y. *et al.* Effect of rolling reduction on the texture evolution and mechanical properties hot-rolled WMoTaV refractory high entropy alloy with interfacial segregation. *Materials Science and Engineering: A* **927** (2025). <https://doi.org:10.1016/j.msea.2025.148010>

57 Bowling, L. S. *et al.* A unified model of tensile and creep deformation for use in niobium alloy materials selection and design for high-temperature applications. *Materialia* **38** (2024). <https://doi.org:10.1016/j.mtla.2024.102210>

58 Buckman Jr, R. & Goodspeed, R. C. Precipitation strengthened tantalum base alloys. (NASA, 1971).

59 Li, H. Y. *et al.* Achieving synergistic strength-ductility in a novel refractory high-entropy alloy from room to high temperatures through nano-silicide precipitation-mediated dislocation dynamics. *International Journal of Plasticity* **191** (2025). <https://doi.org:10.1016/j.ijplas.2025.104402>

60 Zhang, Z. *et al.* A novel NbTaV0.5Hf0.1 complex concentrated alloy with superior room-temperature tensile plasticity and elevated-temperature strength. *Materials Letters* **368** (2024). <https://doi.org:10.1016/j.matlet.2024.136632>

61 Sankar, M., Baligidad, R. G., Satyanarayana, D. V. V. & Gokhale, A. A. Effect of internal oxidation on the microstructure and mechanical properties of C-103 alloy. *Materials Science and Engineering: A* **574**, 104-112 (2013). <https://doi.org:https://doi.org/10.1016/j.msea.2013.02.057>

62 Corn, D. L., Douglass, D. L. & Smith, C. A. The internal oxidation of Nb-Hf alloys. *Oxidation of Metals* **35**, 139-173 (1991). <https://doi.org:10.1007/BF00666504>

63 Carpenter, R. & Liu, C. Intercrystalline fracture in an internally oxidized bcc alloy. (Oak Ridge National Lab., Tenn.(USA), 1973).

64 Han, Q. *et al.* Excellent mechanical properties and thermal stability in a Zr gettering treated (VNb)80(TaTi)20 refractory multi-principal element alloy. *Materials Science and Engineering: A* **934** (2025). <https://doi.org:10.1016/j.msea.2025.148299>

65 Taylor, A. & Doyle, N. J. The solid-solubility of oxygen in Nb and Nb-rich, Nb-Hf, Nb-Mo and Nb-W alloys: Part II: the ternary system Nb-Hf-O. *Journal of the Less Common Metals* **13**, 331-337 (1967). <https://doi.org:https://doi.org/10.1016/0022-5088(67)90141-5>

66 Pöhl, C., Schatte, J. & Leitner, H. Solid solution softening of polycrystalline molybdenum–hafnium alloys. *Journal of Alloys and Compounds* **576**, 250-256 (2013). <https://doi.org:10.1016/j.jallcom.2013.04.138>

67 Argibay, N. *et al.* Achieving High Tensile Strength and Ductility in Refractory Alloys by Tuning Electronic Structure. (2025). <https://doi.org:10.21203/rs.3.rs-6422281/v1>

68 Chong, Y. *et al.* Grain refinement in titanium prevents low temperature oxygen embrittlement. *Nat Commun* **14**, 404 (2023). <https://doi.org:10.1038/s41467-023-36030-0>

69 Inouye, H. in *Refractory Metal Alloys Metallurgy and Technology.* (eds I. Machlin, R. T. Begley, & E. D. Weisert) 165-195 (Springer US).

70 Barin, I. & Platzki, G. *Thermochemical data of pure substances*. Vol. 304 (VCh Weinheim, 1989).

71 Sankar, M., Chaudhary, S., Prasad, V. V. S. & Gopalakrishna, B. Microstructure and Mechanical Properties of Electron Beam Melted Nb–W and Nb–W–Zr Alloys. *Transactions of the Indian Institute of Metals* **77**, 427-434 (2023). <https://doi.org:10.1007/s12666-023-03117-7>

72 Hajitabar, A. & Naffakh-Moosavy, H. The microstructure analysis, mechanical properties, and fracture behavior of electron beam welded C-103 niobium-based refractory alloy. *Journal of Materials Research and Technology* **24**, 7366-7380 (2023). <https://doi.org:10.1016/j.jmrt.2023.05.070>

73 Xie, Z. M. *et al.* Extraordinary high ductility/strength of the interface designed bulk W-ZrC alloy plate at relatively low temperature. *Scientific Reports* **5**, 16014 (2015). <https://doi.org:10.1038/srep16014>

74 Wei, Q. Q. *et al.* A carbide-reinforced Re0.5MoNbW(TaC)0.8 eutectic high-entropy composite with outstanding compressive properties. *Scripta Materialia* **200** (2021). <https://doi.org:10.1016/j.scriptamat.2021.113909>

75 Wei, Q. *et al.* High-temperature ultra-strength of dual-phase Re0.5MoNbW(TaC)0.5 high-entropy alloy matrix composite. *Journal of Materials Science & Technology* **84**, 1-9 (2021). <https://doi.org:10.1016/j.jmst.2020.12.015>

76 Wei, Q. *et al.* Metal-carbide eutectics with multiprincipal elements make superrefractory alloys. *Science Advances* **8**, eabo2068 (2022). <https://doi.org:doi:10.1126/sciadv.abo2068>

77 Zhang, Y., Wei, Q., Xie, P. & Xu, X. An ultrastrong niobium alloy enabled by refractory carbide and eutectic structure. *Materials Research Letters* **11**, 169-178 (2022). <https://doi.org:10.1080/21663831.2022.2133977>

78 Shen, Q. *et al.* Enhanced an eutectic carbide reinforced niobium alloy by optimizing Mo and W alloying elements. *International Journal of Refractory Metals and Hard Materials* **125** (2024). <https://doi.org:10.1016/j.ijrmhm.2024.106893>

79 Gou, X., Cao, R., Zhou, W., Shen, Z. & Li, Y. Microstructures, mechanical properties, and strengthening mechanisms of the (NbMoTa)100−C refractory medium-entropy alloys. *Journal of Materials Science & Technology* **214**, 105-119 (2025). <https://doi.org:10.1016/j.jmst.2024.06.034>

80 Shen, Q. *et al.* A strong-ductile niobium alloy enhanced by eutectic Nb2C. *Materials Science and Engineering: A* **882** (2023). <https://doi.org:10.1016/j.msea.2023.145448>

81 Wei, Q., Liu, Z., Shen, Q., Chen, J. & Xu, X. Enhanced strength and plasticity in a Nb2MoWC0.5 alloy via eutectic dilute carbide. *Materials Science and Engineering: A* **872** (2023). <https://doi.org:10.1016/j.msea.2023.144920>

82 Tian, Y. *et al.* Promoted room-temperature deformability and high-temperature strength synergy through zig-zag faceted interface design in TiNbTaWC0.7 eutectic refractory high-entropy alloy. *Journal of Materials Research and Technology* **33**, 9507-9518 (2024). <https://doi.org:https://doi.org/10.1016/j.jmrt.2024.11.245>

83 Wang, X. *et al.* Superior high-temperature strength of a carbide-reinforced high-entropy alloy with ultrafine eutectoid structure. *Scripta Materialia* **255** (2025). <https://doi.org:10.1016/j.scriptamat.2024.116393>

84 Mustafi, L. *et al.* Effect of oxygen on the microstructure, tensile properties and deformation behaviours of a biocompatible Ti40Zr25Nb25Ta10 high entropy alloy. *Journal of Materials Science & Technology* **214**, 62-73 (2025). <https://doi.org:10.1016/j.jmst.2024.06.022>

85 Wang, S. *et al.* The effects of interstitial oxygen on mechanical properties of TiZrNb medium-entropy alloy over a wide temperature range. *Journal of Alloys and Compounds* **989** (2024). <https://doi.org:10.1016/j.jallcom.2024.174394>

86 Senkov, O. N. *et al.* Microstructure and elevated temperature properties of a refractory TaNbHfZrTi alloy. *Journal of Materials Science* **47**, 4062-4074 (2012). <https://doi.org:10.1007/s10853-012-6260-2>

87 Han, S. *et al.* Effects of HCP elements Ti and Zr on the plastic deformation behavior of Ti-Zr-Nb medium-entropy alloys with the BCC structure. *Acta Materialia*, 121367 (2025). <https://doi.org:https://doi.org/10.1016/j.actamat.2025.121367>

88 Charpagne, M. A., Stinville, J. C., Wang, F., Philips, N. & Pollock, T. M. Orientation dependent plastic localization in the refractory high entropy alloy HfNbTaTiZr at room temperature. *Materials Science and Engineering: A* **848**, 143291 (2022). <https://doi.org:https://doi.org/10.1016/j.msea.2022.143291>

89 Li, Z. *et al.* Dislocation behavior and slip plane preferences in refractory multi-principal element alloys: Insights into strength-ductility trade-offs. *Journal of Materials Science & Technology* (2025). <https://doi.org:https://doi.org/10.1016/j.jmst.2025.05.052>

90 Li, Z. *et al.* Tuning deformation mechanisms in refractory high-entropy alloys: slip plane preference and dislocation behavior. *International Journal of Plasticity*, 104424 (2025). <https://doi.org:https://doi.org/10.1016/j.ijplas.2025.104424>

91 Zhang, C. *et al.* Strong and ductile refractory high-entropy alloys with super formability. *Acta Materialia* **245** (2023). <https://doi.org:10.1016/j.actamat.2022.118602>

92 Wang, S., Wu, M., Shu, D. & Sun, B. Kinking in a refractory TiZrHfNb0.7 medium-entropy alloy. *Materials Letters* **264** (2020). <https://doi.org:10.1016/j.matlet.2020.127369>

93 Gao, J. *et al.* Deformation mechanisms in a metastable beta titanium twinning induced plasticity alloy with high yield strength and high strain hardening rate. *Acta Materialia* **152**, 301-314 (2018). <https://doi.org:10.1016/j.actamat.2018.04.035>

94 Wang, S. *et al.* TiZrHfNb refractory high-entropy alloys with twinning-induced plasticity. *Journal of Materials Science & Technology* **187**, 72-85 (2024). <https://doi.org:10.1016/j.jmst.2023.11.047>

95 Xiao, J. *et al.* Unveiling deformation twin nucleation and growth mechanisms in BCC transition metals and alloys. *Materials Today* **65**, 90-99 (2023). <https://doi.org:10.1016/j.mattod.2023.03.028>

96 Abdolvand, H. & Wilkinson, A. J. Assessment of residual stress fields at deformation twin tips and the surrounding environments. *Acta Materialia* **105**, 219-231 (2016). <https://doi.org:https://doi.org/10.1016/j.actamat.2015.11.036>

97 Sheikh, S. *et al.* Alloy design for intrinsically ductile refractory high-entropy alloys. *Journal of Applied Physics* **120** (2016). <https://doi.org:10.1063/1.4966659>

98 Han, Z. *et al.* Superior cryogenic strength and ductility in VNbTa body-centered cubic medium-entropy alloys. *Materials Characterization* **204** (2023). <https://doi.org:10.1016/j.matchar.2023.113247>

99 Yang, L. *et al.* An ambient ductile VNbTa refractory medium-entropy alloy with super rolling formability. *Materials Science and Engineering: A* **889** (2024). <https://doi.org:10.1016/j.msea.2023.145841>

100 Rosenberg, J. M. & Piehler, H. R. Calculation of the taylor factor and lattice rotations for bcc metals deforming by pencil glide. *Metallurgical Transactions* **2**, 257-259 (1971). <https://doi.org:10.1007/BF02662666>

101 Gilormini, P., Bacroix, B. & Jonas, J. J. Theoretical analyses of 〈111〉 pencil glide in b.c.c. crystals. *Acta Metallurgica* **36**, 231-256 (1988). <https://doi.org:https://doi.org/10.1016/0001-6160(88)90001-6>

102 Douat, B. *et al.* Atomic-scale insight into non-crystallographic slip traces in body-centred cubic crystals. *Scripta Materialia* **162**, 292-295 (2019). <https://doi.org:10.1016/j.scriptamat.2018.10.032>

103 Marichal, C., Van Swygenhoven, H., Van Petegem, S. & Borca, C. {110} Slip with {112} slip traces in bcc Tungsten. *Scientific Reports* **3**, 2547 (2013). <https://doi.org:10.1038/srep02547>

104 Charpagne, M. A., Stinville, J. C., Wang, F., Philips, N. & Pollock, T. M. Orientation dependent plastic localization in the refractory high entropy alloy HfNbTaTiZr at room temperature. *Materials Science and Engineering: A* **848** (2022). <https://doi.org:10.1016/j.msea.2022.143291>

105 Chen, N. K. & Maddin, R. Slip planes and the energy of dislocations in a bodycentered cubic structure. *Acta Metallurgica* **2**, 49-51 (1954). <https://doi.org:https://doi.org/10.1016/0001-6160(54)90093-0>

106 He, Q., Yoshida, S., Okajo, S., Tanaka, M. & Tsuji, N. Characteristic dislocation slip behavior in polycrystalline HfNbTiZr refractory medium entropy alloy. *Journal of Materials Science & Technology* **210**, 29-39 (2025). <https://doi.org:10.1016/j.jmst.2024.05.029>

107 Tanaka, M., Okajo, S., Yamasaki, S. & Morikawa, T. Persistent slip observed in TiZrNbHfTa: A body-centered high-entropy cubic alloy. *Scripta Materialia* **200**, 113895 (2021). <https://doi.org:https://doi.org/10.1016/j.scriptamat.2021.113895>

108 Bieler, T. R., Eisenlohr, P., Zhang, C., Phukan, H. J. & Crimp, M. A. Grain boundaries and interfaces in slip transfer. *Current Opinion in Solid State and Materials Science* **18**, 212-226 (2014). <https://doi.org:10.1016/j.cossms.2014.05.003>

109 Luster, J. & Morris, M. A. Compatibility of deformation in two-phase Ti-Al alloys: Dependence on microstructure and orientation relationships. *Metallurgical and Materials Transactions A* **26**, 1745-1756 (1995). <https://doi.org:10.1007/BF02670762>

110 Vitek, K. I. V. Atomistic study of non-Schmid effects in the plastic yielding of bcc metals. *Philosophical Magazine A* **81**, 1387-1407 (2001). <https://doi.org:10.1080/01418610110033885>

111 Dezerald, L., Rodney, D., Clouet, E., Ventelon, L. & Willaime, F. Plastic anisotropy and dislocation trajectory in BCC metals. *Nat Commun* **7**, 11695 (2016). <https://doi.org:10.1038/ncomms11695>

112 Yang, B. *et al.* Grain size dependence of microscopic strain distribution in a high entropy alloy at the onset of plastic deformation. *Acta Materialia* **285** (2025). <https://doi.org:10.1016/j.actamat.2024.120682>

113 Li, Z. & Cui, Y. Non-Schmid Effect on the Fracture Behavior of Tungsten. *Crystals* **13** (2023). <https://doi.org:10.3390/cryst13030417>

114 Hajitabar, A. & Naffakh-Moosavy, H. The influence of weld fluid flow on the formation mechanism of intermetallics and HfO2 precipitates in dissimilar electron beam welding of C-103 niobium alloy to nickel. *Materials Chemistry and Physics* **315** (2024). <https://doi.org:10.1016/j.matchemphys.2024.129069>

115 Qin, M. *et al.* Achieving an excellent synergy of strength and ductility in heat-treated laser powder bed fused niobium-based alloys via ZrO2-induced sub-grains. *Materials Science and Engineering: A* **940**, 148575 (2025). <https://doi.org:https://doi.org/10.1016/j.msea.2025.148575>

116 Sunagawa, I. Growth and morphology of crystals. *FORMA-TOKYO-* **14**, 147-166 (1999).

117 Xian, J. W. *et al.* Cu6Sn5 crystal growth mechanisms during solidification of electronic interconnections. *Acta Materialia* **126**, 540-551 (2017). <https://doi.org:https://doi.org/10.1016/j.actamat.2016.12.043>

118 Yu, G. B., Tao, F. H., Wang, S. H., Cao, L. J. & Ma, Q. Solidification Behavior of Lined Al2O3-ZrO2 Multiphase Ceramics in SHS Composite Pipes. *Advanced Materials Research* **905**, 109-112 (2014). <https://doi.org:10.4028/www.scientific.net/AMR.905.109>

119 Zheng, L., Malfliet, A., Wollants, P., Blanpain, B. & Guo, M. Effect of Impurity Te on the Morphology of Alumina Particles in Molten Iron. *ISIJ International* **56**, 1529-1536 (2016). <https://doi.org:10.2355/isijinternational.ISIJINT-2015-621>

120 Sibil, A. *et al.* Microcracking of high zirconia refractories after t→m phase transition during cooling: An EBSD study. *Journal of the European Ceramic Society* **31**, 1525-1531 (2011). <https://doi.org:https://doi.org/10.1016/j.jeurceramsoc.2011.02.033>

121 Kral, M. V. & Spanos, G. Crystallography of grain boundary cementite dendrites. *Acta Materialia* **51**, 301-311 (2003). <https://doi.org:https://doi.org/10.1016/S1359-6454(02)00231-8>

122 Spanos*, G. & Kral, M. V. The proeutectoid cementite transformation in steels. *International Materials Reviews* **54**, 19-47 (2009). <https://doi.org:10.1179/174328009X392949>

123 Chien, F. R., Ubic, F. J., Prakash, V. & Heuer, A. H. Stress-induced martensitic transformation and ferroelastic deformation adjacent microhardness indents in tetragonal zirconia single crystals. *Acta Materialia* **46**, 2151-2171 (1998). <https://doi.org:https://doi.org/10.1016/S1359-6454(97)00444-8>

124 Baither, D. *et al.* Ferroelastic and Plastic Deformation of t′-Zirconia Single Crystals. *Journal of the American Ceramic Society* **84**, 1755-1762 (2001). <https://doi.org:https://doi.org/10.1111/j.1151-2916.2001.tb00911.x>

125 Stephens, J. R. in *Symposium on Space Nuclear Power Systems.*

126 Li, H. *et al.* The phase stability of t-ZrO2 realized by grain size at cryogenic temperature in ZrO2/TiO2 composite. *Materials & Design* **239** (2024). <https://doi.org:10.1016/j.matdes.2024.112741>

127 Harlow, W., Lang, A. C., Demaske, B. J., Phillpot, S. R. & Taheri, M. L. Thickness-dependent stabilization of tetragonal ZrO2 in oxidized zirconium. *Scripta Materialia* **145**, 95-98 (2018). <https://doi.org:10.1016/j.scriptamat.2017.09.014>

128 Kelly, P. M. & Francis Rose, L. R. The martensitic transformation in ceramics — its role in transformation toughening. *Progress in Materials Science* **47**, 463-557 (2002). <https://doi.org:https://doi.org/10.1016/S0079-6425(00)00005-0>

129 Slagter, A. & Schuh, C. A. Crystallographic correspondences and variant selection in zirconia-based shape memory ceramics: Insights from EBSD mapping. *Acta Materialia* **296**, 121286 (2025). <https://doi.org:https://doi.org/10.1016/j.actamat.2025.121286>

130 Hayakawa, M., Kuntani, N. & Oka, M. Structural study on the tetragonal to monoclinic transformation in arc-melted ZrO2-2mol.%Y2O3—I. Experimental observations. *Acta Metallurgica* **37**, 2223-2228 (1989). <https://doi.org:https://doi.org/10.1016/0001-6160(89)90148-X>

131 Yang, Q., Tatsuoka, H. & Tanaka, M. The (011) Twin Structure Periodical in Monoclinic ZrO2 Nanofiber. *e-Journal of Surface Science and Nanotechnology* **12**, 418-419 (2014). <https://doi.org:10.1380/ejssnt.2014.418>

132 White, L. F. *et al.* Evidence of extensive lunar crust formation in impact melt sheets 4,330 Myr ago. *Nature Astronomy* **4**, 974-978 (2020). <https://doi.org:10.1038/s41550-020-1092-5>

133 Cayron, C., Douillard, T., Sibil, A., Fantozzi, G. & Sao-Jao, S. Reconstruction of the Cubic and Tetragonal Parent Grains from Electron Backscatter Diffraction Maps of Monoclinic Zirconia. *Journal of the American Ceramic Society* **93**, 2541-2544 (2010). <https://doi.org:https://doi.org/10.1111/j.1551-2916.2010.03894.x>

134 Chiao, Y. H. & Chen, I. W. Martensitic growth in ZrO2—An in situ, small particle, TEM study of a single-interface transformation. *Acta Metallurgica et Materialia* **38**, 1163-1174 (1990). <https://doi.org:https://doi.org/10.1016/0956-7151(90)90189-N>

135 Silvestroni, L. *et al.* Microstructure and properties of HfC and TaC-based ceramics obtained by ultrafine powder. *Journal of the European Ceramic Society* **31**, 619-627 (2011). <https://doi.org:https://doi.org/10.1016/j.jeurceramsoc.2010.10.036>

136 Gruber, H. Consumable-electrode vacuum arc melting. *JOM* **10**, 193-198 (1958). <https://doi.org:10.1007/BF03397883>

137 Yan, X. *et al.* The mechanisms for removing O, N, C and metal impurities in the purification of tungsten by electron beam smelting. *Separation and Purification Technology* **376** (2025). <https://doi.org:10.1016/j.seppur.2025.133893>

138 A.J. Singh. Ultrapurification of Refractory Metals. *High Temperature Materials and Processes* **11**, 305-350 (1993). <https://doi.org:doi:10.1515/HTMP.1993.11.1-4.305>

139 Sankar, M., Mirji, K. V., Prasad, V. V. S., Baligidad, R. G. & Gokhale, A. A. Purification of Niobium by Electron Beam Melting. *High Temperature Materials and Processes* **35**, 621-627 (2016). <https://doi.org:doi:10.1515/htmp-2014-0218>

140 Hu, P. *et al.* Synthesis and oxygen evolution mechanism of hypoxia carbon-control titanium-zirconium-molybdenum alloy. *Journal of Alloys and Compounds* **870** (2021). <https://doi.org:10.1016/j.jallcom.2021.159429>

141 Vutova, K., Stefanova, V., Markov, M. & Vassileva, V. Study of the Possibility of Recycling of Technogenic Hafnium during Electron Beam Refining. *Materials (Basel)* **15** (2022). <https://doi.org:10.3390/ma15238518>

142 Lang, D. *et al.* On the chemistry of the carbides in a molybdenum base Mo-Hf-C alloy produced by powder metallurgy. *Journal of Alloys and Compounds* **654**, 445-454 (2016). <https://doi.org:https://doi.org/10.1016/j.jallcom.2015.09.126>

143 Wei, S., Zhu, G. & Tasan, C. C. Slip-twinning interdependent activation across phase boundaries: An in-situ investigation of a Ti-Al-V-Fe (α+β) alloy. *Acta Materialia* **206**, 116520 (2021). <https://doi.org:https://doi.org/10.1016/j.actamat.2020.116520>

144 Livingston, J. D. & Chalmers, B. Multiple slip in bicrystal deformation. *Acta Metallurgica* **5**, 322-327 (1957). <https://doi.org:https://doi.org/10.1016/0001-6160(57)90044-5>

145 Shen, Z., Wagoner, R. H. & Clark, W. A. T. Dislocation pile-up and grain boundary interactions in 304 stainless steel. *Scripta Metallurgica* **20**, 921-926 (1986). <https://doi.org:https://doi.org/10.1016/0036-9748(86)90467-9>

146 Shen, Z., Wagoner, R. H. & Clark, W. A. T. Dislocation and grain boundary interactions in metals. *Acta Metallurgica* **36**, 3231-3242 (1988). <https://doi.org:https://doi.org/10.1016/0001-6160(88)90058-2>

147 Xu, Z. *et al.* Systematic analysis of tensile properties of the TiVNbMoCr high entropy alloys in terms of the physical parameters. *Journal of Materials Research and Technology* **33**, 7914-7930 (2024). <https://doi.org:10.1016/j.jmrt.2024.11.053>

148 Mercier, D., Zambaldi, C. & Bieler, T. R. A Matlab toolbox to analyze slip transfer through grain boundaries. *IOP Conference Series: Materials Science and Engineering* **82**, 012090 (2015). <https://doi.org:10.1088/1757-899X/82/1/012090>

149 Hachet, G., Caillard, D., Ventelon, L. & Clouet, E. Mobility of screw dislocation in BCC tungsten at high temperature in presence of carbon. *Acta Materialia* **222** (2022). <https://doi.org:10.1016/j.actamat.2021.117440>

150 Ventelon, L. *et al.* Mobility of carbon-decorated screw dislocations in bcc iron. *Acta Materialia* **247** (2023). <https://doi.org:10.1016/j.actamat.2023.118716>

151 Leveau, T., Ventelon, L. & Clouet, E. Interaction of C, N and O interstitial solute atoms with screw dislocations in HfNbTaTiZr high entropy alloy. *Acta Materialia* **275** (2024). <https://doi.org:10.1016/j.actamat.2024.120062>

152 Suzuki, T., Takeuchi, S. & Yoshinaga, H. in *Dislocation Dynamics and Plasticity* (eds Taira Suzuki, Shin Takeuchi, & Hideo Yoshinaga) 63-76 (Springer Berlin Heidelberg, 1991).

153 Huang, S. *et al.* Strengthening or softening: On the impact of off-stoichiometry on the mechanical properties of ZrC. *Acta Materialia* **289** (2025). <https://doi.org:10.1016/j.actamat.2025.120892>

154 Han, Y. *et al.* Ultra-dense dislocations stabilized in high entropy oxide ceramics. *Nature Communications* **13**, 2871 (2022). <https://doi.org:10.1038/s41467-022-30260-4>

155 Jiang, B. *et al.* Structural studies of TiC1−xOx solid solution by Rietveld refinement and first-principles calculations. *Journal of Solid State Chemistry* **204**, 1-8 (2013). <https://doi.org:10.1016/j.jssc.2013.05.009>

156 Xiao, J., Jiang, B., Huang, K. & Zhu, H. Structural and elastic properties of TiCxN1−x, TiCxO1−x, TiOxN1−x solid solutions from first-principles calculations. *Computational Materials Science* **88**, 86-91 (2014). <https://doi.org:10.1016/j.commatsci.2014.02.042>

157 Zhang, Y., Liu, B. & Wang, J. Self-assembly of Carbon Vacancies in Sub-stoichiometric ZrC1−x. *Scientific Reports* **5**, 18098 (2015). <https://doi.org:10.1038/srep18098>

158 Tsetseris, L. & Pantelides, S. T. Vacancies, interstitials and their complexes in titanium carbide. *Acta Materialia* **56**, 2864-2871 (2008). <https://doi.org:https://doi.org/10.1016/j.actamat.2008.02.020>

159 Gusev, A. I. Melting temperature and elastic constants of disordered nonstoichiometric cubic TiCy, ZrCy and HfCy carbides. *International Journal of Refractory Metals and Hard Materials* **126**, 106920 (2025). <https://doi.org:https://doi.org/10.1016/j.ijrmhm.2024.106920>

160 Wen, R. M., Liang, W. Y., Sun, L., Fan, J. L. & Gong, H. R. Effects of Ti, Zr, Ta, and W on elastic properties, stacking fault energy, and ductility of HfC. *International Journal of Refractory Metals and Hard Materials* **111**, 106056 (2023). <https://doi.org:https://doi.org/10.1016/j.ijrmhm.2022.106056>

161 Sangiovanni, D. G., Kaufmann, K. & Vecchio, K. Valence electron concentration as key parameter to control the fracture resistance of refractory high-entropy carbides. *Science Advances* **9**, eadi2960 (2023). <https://doi.org:doi:10.1126/sciadv.adi2960>

162 Vecchio, K. *et al.* Fermi energy engineering of enhanced plasticity in high-entropy carbides. *Acta Materialia* **276**, 120117 (2024). <https://doi.org:https://doi.org/10.1016/j.actamat.2024.120117>

163 Watkins, B. R., Huang, Y., Stubbers, A., Thompson, G. B. & Weinberger, C. R. Plasticity-fracture competition and anomalous hardness in the hard metals. *Acta Materialia*, 121350 (2025). <https://doi.org:https://doi.org/10.1016/j.actamat.2025.121350>

164 Yu, C., Lian, L., Bao, Z., Zhang, R. & Liu, Y. Enhanced Strength–Ductility Synergy in Nb-Mo-Ta-W-Ti Refractory High-Entropy Alloys via Dislocation Regulation and MC Carbide Precipitation. *SSRN* <https://doi.org:https://dx.doi.org/10.2139/ssrn.5491389>

165 Nishiyama, Z. X-ray investigation of the mechanism of the transformation from face centered cubic lattice to body centered cubic. *Sci. Rep. Tohoku Univ.* **23**, 637 (1934).

166 Liu, T.-W. & Wu, X.-L. Martensitic transformation pathways and crystallographic orientation relationships in steel. *Journal of Materials Science & Technology* **174**, 74-84 (2024). <https://doi.org:https://doi.org/10.1016/j.jmst.2023.06.060>

167 Kurdjumov, G. Over the mechanisms of steel hardening. *Z. Phys.* **64**, 325 (1930).

168 He, Y., Godet, S. & Jonas, J. J. Representation of misorientations in Rodrigues–Frank space: application to the Bain, Kurdjumov–Sachs, Nishiyama–Wassermann and Pitsch orientation relationships in the Gibeon meteorite. *Acta Materialia* **53**, 1179-1190 (2005). <https://doi.org:https://doi.org/10.1016/j.actamat.2004.11.021>

169 Karthikeyan, T., Dash, M. K., Saroja, S. & Vijayalakshmi, M. Estimation of martensite feature size in a low-carbon alloy steel by microtexture analysis of boundaries. *Micron* **68**, 77-90 (2015). <https://doi.org:https://doi.org/10.1016/j.micron.2014.09.008>

170 Hata, K. *et al.* In Situ EBSD Analysis on the Crystal Orientation Relationship between Ferrite and Austenite during Reverse Transformation of an Fe-Mn-C Alloy. *MATERIALS TRANSACTIONS* **57**, 1514-1519 (2016). <https://doi.org:10.2320/matertrans.MAW201602>

171 Pitsch, W. The martensite transformation in thin foils of iron-nitrogen alloys. *The Philosophical Magazine: A Journal of Theoretical Experimental and Applied Physics* **4**, 577-584 (1959). <https://doi.org:10.1080/14786435908238253>

172 Morito, S., Tanaka, H., Konishi, R., Furuhara, T. & Maki, T. The morphology and crystallography of lath martensite in Fe-C alloys. *Acta Materialia* **51**, 1789-1799 (2003). <https://doi.org:https://doi.org/10.1016/S1359-6454(02)00577-3>

173 Sun, H. *et al.* The morphology and crystallography of lath martensite via high pressure martensitic transformation in Fe-0.45 wt.% C steel. *Acta Materialia* **284**, 120624 (2025). <https://doi.org:https://doi.org/10.1016/j.actamat.2024.120624>

174 Li, X. L., Deng, X. T., Lei, C. S. & Wang, Z. D. New orientation relationship with low interfacial energy in MC/ferrite system observed in Nb-Ti bearing steel during isothermal quenching process. *Scripta Materialia* **163**, 101-106 (2019). <https://doi.org:https://doi.org/10.1016/j.scriptamat.2019.01.008>

175 Li, X. *et al.* A new orientation relationship observed between MC and ferrite in TiMo microalloyed steel produced by ultra-fast cooling. *Materials Characterization* **192**, 112233 (2022). <https://doi.org:https://doi.org/10.1016/j.matchar.2022.112233>

176 Zhang, Y. *et al.* Thermal stabilizing and toughening of a dual-phase Nb alloy by tuning stabilizing element C in Nb-BCC. *Journal of Materials Science & Technology* **186**, 207-218 (2024). <https://doi.org:10.1016/j.jmst.2023.09.060>

177 Yang, J., Huang, Y., Liu, B., Guo, C. & Sun, J. Precipitation behavior in a Nb-5W-2Mo-1Zr niobium alloy fabricated by electron beam selective melting. *Materials Characterization* **174** (2021). <https://doi.org:10.1016/j.matchar.2021.111019>

178 Kondrat’ev, S. Y., Sviatysheva, E. V., Anastasiadi, G. P. & Petrov, S. N. Fragmented structure of niobium carbide particles in as-cast modified HP alloys. *Acta Materialia* **127**, 267-276 (2017). <https://doi.org:https://doi.org/10.1016/j.actamat.2017.01.043>

179 Pöhl, C., Lang, D., Schatte, J. & Leitner, H. Strain induced decomposition and precipitation of carbides in a molybdenum–hafnium–carbon alloy. *Journal of Alloys and Compounds* **579**, 422-431 (2013). <https://doi.org:10.1016/j.jallcom.2013.06.086>

180 Wilde, J., Cerezo, A. & Smith, G. D. W. Three-dimensional atomic-scale mapping of a cottrell atmosphere around a dislocation in iron. *Scripta Materialia* **43**, 39-48 (2000). <https://doi.org:https://doi.org/10.1016/S1359-6462(00)00361-4>

181 Sénac, C. Mechanisms and micromechanics of intergranular ductile fracture. *International Journal of Solids and Structures* **301**, 112951 (2024). <https://doi.org:https://doi.org/10.1016/j.ijsolstr.2024.112951>

182 Pineau, A., Benzerga, A. A. & Pardoen, T. Failure of metals I: Brittle and ductile fracture. *Acta Materialia* **107**, 424-483 (2016). <https://doi.org:10.1016/j.actamat.2015.12.034>

183 Launey, M. E. & Ritchie, R. O. On the Fracture Toughness of Advanced Materials. *Advanced Materials* **21**, 2103-2110 (2009). <https://doi.org:10.1002/adma.200803322>

184 Kumar, S. & Curtin, W. A. Crack interaction with microstructure. *Materials Today* **10**, 34-44 (2007). <https://doi.org:10.1016/s1369-7021(07)70207-9>

185 Xu, L. *et al.* Heterostructural nanolamellar oxide-dispersion-strengthened ferritic alloy with exceptional strength and ductility. *Scripta Materialia* **242** (2024). <https://doi.org:10.1016/j.scriptamat.2023.115949>

186 Shi, P. *et al.* Hierarchical crack buffering triples ductility in eutectic herringbone high-entropy alloys. *Science* **373**, 912-918 (2021). <https://doi.org:doi:10.1126/science.abf6986>

187 Cayron, C. GenOVa: a computer program to generate orientational variants. *Journal of Applied Crystallography* **40**, 1179-1182 (2007). <https://doi.org:doi:10.1107/S0021889807048741>

188 Schmidt, F. & Ogden, H. R. *The engineering properties of columbium and columbium alloys*. Vol. 188 (Defense Metals Information Center, Battelle Memorial Institute, 1963).

189 Hebsur, M. G. & Titran, R. H. in *TMS-AIME Fall Meeting.*

190 Schmidt, F. & Ogden, H. R. *The engineering properties of tantalum and tantalum alloys*. Vol. 189 (Defense Metals Information Center, Battelle Memorial Institute, 1963).

191 Ammon, R. Process development of two high strength tantalum base alloys (ASTAR-1211C and ASTAR-1511C). (1974).

192 Ban'kovskii, O. I., Vasil'ev, A. D., Malashenko, I. S., Moiseev, V. F. & Trefilov, V. I. Fracture mechanism in a dispersion hardened cast niobium alloy. *Strength of Materials* **9**, 868-874 (1977). <https://doi.org:10.1007/BF01529029>

193 Chen, J. *et al.* Strong and ductile niobium-based refractory alloy via deformable zirconia nanoparticles. *International Journal of Refractory Metals and Hard Materials* **118**, 106451 (2024). <https://doi.org:https://doi.org/10.1016/j.ijrmhm.2023.106451>

194 Xu, W. Z. *et al.* Nano ZrO2 particles in nanocrystalline Fe–14Cr–1.5Zr alloy powders. *Journal of Nuclear Materials* **452**, 434-439 (2014). <https://doi.org:https://doi.org/10.1016/j.jnucmat.2014.05.067>

195 Morozumi, S., Kikuchi, M., Saito, K. & Mukaiyama, S.-i. Diffusion Bonding of Niobium and Y2O3-Stabilized ZrO2 or HfO2. *ISIJ International* **30**, 1066-1070 (1990). <https://doi.org:10.2355/isijinternational.30.1066>

196 Bartolomé, J. F. *et al.* Influence of ceramic–metal interface adhesion on crack growth resistance of ZrO2–Nb ceramic matrix composites. *Acta Materialia* **56**, 3358-3366 (2008). <https://doi.org:https://doi.org/10.1016/j.actamat.2008.03.021>
